# Supplementary material for: Synthesis of 1,3,5-trisubstituted pyrazolesvia1,3-dipolar cycloaddition of nitrile imines with ninhydrin-derived Morita–Baylis–Hillman carbonates
Source: Royal Society of Chemistry journal article supplement (doi:10.1039/d2ob01253g), 2022-01-01

# Synthesis of 1,3,5-trisubstituted pyrazoles via 1,3-dipolar cycloaddition of nitrile imines with ninhydrin-derived Morita–Baylis–Hillman carbonates

Kai-Kai Wang,<sup>a</sup> Yan-Li Li,<sup>b</sup> Jun Jing,<sup>a</sup> Rongxiang Chen,<sup>\*a</sup> Na-Na Zhao,<sup>a</sup> Zhi-Hui Li,<sup>a</sup> Ming-Yue Wang,<sup>a</sup> Shuo-Ke Ji<sup>a</sup>

<sup>a</sup> School of Pharmacy, Xinxiang University, Xinxiang, Henan 453000, P. R. China.

<sup>b</sup> Medical College, Xinxiang University, Xinxiang, Henan 453000, P. R. China.

chenhlmei@163.com (R. Chen)

## Supporting Information

### Table of Contents

1. General methods
2. General procedure for synthesis of the 1,3,5-trisubstituted pyrazoles 3.
3. Transformations of product 3a
4. Crystal data and structural refinement for 3b and 5b
5. NMR spectra

### 1. General methods

NMR data were obtained for <sup>1</sup>H at 400 MHz, and for <sup>13</sup>C at 100 MHz. Chemical shifts were reported in

ppm from tetramethylsilane with the solvent resonance as the internal standard in CDCl<sub>3</sub> solution. ESI HRMS was recorded on a Waters SYNAPT G2. Column chromatography was performed on silica gel (200-300 mesh) eluting with ethyl acetate/petroleum ether. TLC was performed on glass-backed silica plates. UV light, I<sub>2</sub>, and solution of potassium permanganate were used to visualize products. All chemicals were used without purification as commercially available unless otherwise noted. Petroleum ether and ethyl acetate were distilled. THF was freshly distilled from sodium/benzophenone. Unless otherwise noted, experiments involving moisture and/or air sensitive components were performed under a positive pressure of argon in oven-dried glassware equipped with a rubber septum inlet. Dried solvents and liquid reagents were transferred by oven-dried syringes. The ninhydrin-derived Morita–Baylis–Hillman carbonates **1**<sup>1</sup> and hydrazoneyl chloride **2**<sup>2</sup> were prepared according to the literature procedures.

(1) (a) Lu, Z.; Jia, Y.; Chen, X.; Li, P., Organocatalytic Regio- and Enantioselective [3 + 2]-Annulations of Ninhydrin-Derived Morita–Baylis–Hillman Carbonates with 3-Methyleneoxindoles. *J. Org. Chem.* **2022**, *87*, 3184-3194. (b) Tang, X.; Wu, Y.; Jiang, J.; Fang, H.; Zhou, W.-J.; Huang, W.; Zhan, G., Formal (3 + 1) Carboannulation of Morita–Baylis–Hillman Carbonates with Pyridinium Ylides: Access to Spiro-Cyclopentadiene Oxindoles. *Org. Lett.* **2021**, *23*, 8937-8941.

(2) (a) Wang, G.; Liu, X.; Huang, T.; Kuang, Y.; Lin, L.; Feng, X., Asymmetric Catalytic 1,3-Dipolar Cycloaddition Reaction of Nitrile Imines for the Synthesis of Chiral Spiro-Pyrazoline-Oxindoles. *Org. Lett.* **2013**, *15*, 76-79. (b) Garve, L. K. B.; Petzold, M.; Jones, P. G.; Werz, D. B., [3 + 3]-Cycloaddition of Donor–Acceptor Cyclopropanes with Nitrile Imines Generated in Situ: Access to Tetrahydropyridazines. *Org. Lett.* **2016**, *18*, 564-567.

## 2. General procedure for synthesis of the 1,3,5-trisubstituted pyrazoles **3**.

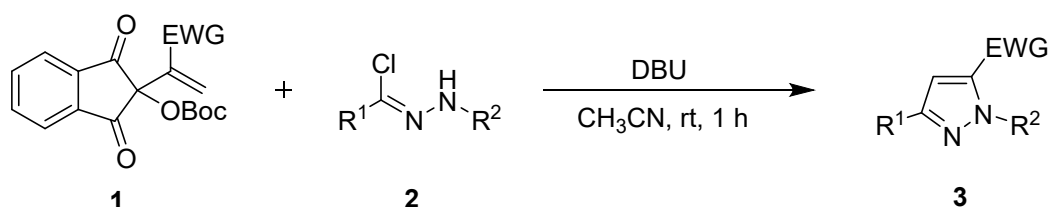

To a solution of ninhydrin-derived Morita–Baylis–Hillman carbonates **1** (0.2 mmol, 1.0 equiv), hydrazoneyl chloride **2** (0.22 mmol, 1.1 equiv), and DBU (0.22 mmol, 1.1 equiv) in CH<sub>3</sub>CN (1.0 mL) was stirred at room temperature for 1 h. After completion, product **3** was obtained by flash chromatography on silica gel (petroleum ether/ethyl acetate = 15:1 to 5:1).

**Methyl 1,3-diphenyl-1H-pyrazole-5-carboxylate (3a)**. Purification by flash chromatography (PE/EA = 15:1) gave a white solid (50.6 mg, 91% yield); m.p. 106-107 °C; <sup>1</sup>H NMR (400 MHz, CDCl<sub>3</sub>) δ 7.87 (d, *J* = 7.6 Hz, 2H), 7.49 – 7.41 (m, 7H), 7.36 (d, *J* = 7.2 Hz, 1H), 7.32 (s, 1H), 3.81 (s, 3H) ppm. <sup>13</sup>C{<sup>1</sup>H} NMR (100 MHz, CDCl<sub>3</sub>) δ 159.6, 151.5, 140.3,

134.2, 132.1, 128.75, 128.73, 128.6, 128.4, 126.1, 125.8, 109.5, 52.1 ppm. HRMS (ESI)  $m/z$ :  $[M + H]^+$  calcd for:  $C_{17}H_{15}N_2O_2$  279.1128, found 279.1121.

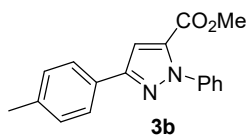

**Methyl 1-phenyl-3-(p-tolyl)-1H-pyrazole-5-carboxylate (3b)**. Purification by flash chromatography (PE/EA = 15:1) gave a white solid (53.7 mg, 92% yield); m.p. 58-59 °C;  $^1H$  NMR (400 MHz,  $CDCl_3$ )  $\delta$  7.76 (d,  $J = 7.6$  Hz, 2H), 7.49 – 7.44 (m, 5H), 7.29

(s, 1H), 7.23 (d,  $J = 7.6$  Hz, 2H), 3.81 (s, 3H), 2.38 (s, 3H) ppm.  $^{13}C\{^1H\}$  NMR (100 MHz,  $CDCl_3$ )  $\delta$  159.6, 151.6, 140.3, 138.3, 134.1, 129.4, 129.3, 128.7, 128.6, 126.1, 125.7, 109.3, 52.0, 21.3 ppm. HRMS (ESI)  $m/z$ :  $[M + H]^+$  calcd for:  $C_{18}H_{17}N_2O_2$  293.1285, found 293.1276.

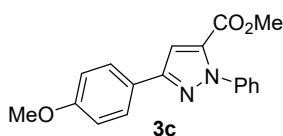

**Methyl 3-(4-methoxyphenyl)-1-phenyl-1H-pyrazole-5-carboxylate (3c)**. Purification by flash chromatography (PE/EA = 10:1) gave a white solid (55.4 mg, 90% yield); m.p. 72-73 °C;  $^1H$  NMR (400 MHz,  $CDCl_3$ )  $\delta$  7.80 (d,  $J = 8.4$  Hz,

2H), 7.49 – 7.44 (m, 5H), 7.25 (s, 1H), 6.95 (d,  $J = 8.8$  Hz, 2H), 3.84 (s, 3H), 3.81 (s, 3H) ppm.  $^{13}C\{^1H\}$  NMR (100 MHz,  $CDCl_3$ )  $\delta$  159.9, 159.6, 151.4, 140.3, 134.1, 128.63, 128.61, 127.1, 126.1, 124.9, 114.1, 109.0, 55.3, 52.0 ppm. HRMS (ESI)  $m/z$ :  $[M + H]^+$  calcd for:  $C_{18}H_{17}N_2O_3$  309.1234, found 309.1227.

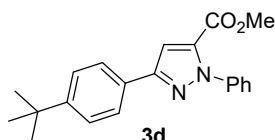

**Methyl 3-(4-(tert-butyl)phenyl)-1-phenyl-1H-pyrazole-5-carboxylate (3d)**. Purification by flash chromatography (PE/EA = 15:1) gave a white solid (60.1 mg, 90% yield); m.p. 53-54 °C;  $^1H$  NMR (400 MHz,  $CDCl_3$ )  $\delta$  7.85 (d,  $J = 7.6$  Hz, 2H),

7.55 – 7.47 (m, 7H), 7.35 (s, 1H), 3.84 (s, 3H), 1.39 (s, 9H) ppm.  $^{13}C\{^1H\}$  NMR (100 MHz,  $CDCl_3$ )  $\delta$  159.7, 151.60, 151.56, 140.4, 134.1, 129.4, 128.7, 128.6, 126.1, 125.7, 125.6, 109.4, 52.1, 34.7, 31.4 ppm. HRMS (ESI)  $m/z$ :  $[M + H]^+$  calcd for:  $C_{21}H_{23}N_2O_2$  335.1754, found 335.1744.

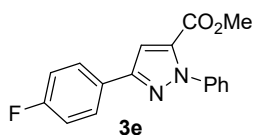

**Methyl 3-(4-fluorophenyl)-1-phenyl-1H-pyrazole-5-carboxylate (3e)**. Purification by flash chromatography (PE/EA = 15:1) gave a white solid (62.8 mg, 94% yield); m.p. 88-89 °C;  $^1H$  NMR (400 MHz,  $CDCl_3$ )  $\delta$  7.84 (dd,  $J = 7.2, 5.6$  Hz, 2H), 7.48 (s,

5H), 7.26 (d,  $J = 5.2$  Hz, 1H), 7.11 (t,  $J = 8.4$  Hz, 2H), 3.81 (s, 3H) ppm.  $^{13}C\{^1H\}$  NMR (100 MHz,  $CDCl_3$ )  $\delta$  163.0 (d,  $J = 246.1$  Hz), 159.5, 150.6, 140.2, 134.3, 128.8, 128.6, 128.4 (d,  $J = 3.2$  Hz), 127.5 (d,  $J = 8.2$  Hz), 126.0, 115.7 (d,  $J = 21.6$  Hz), 109.3, 52.1 ppm.  $^{19}F$  NMR (376 MHz,  $CDCl_3$ )  $\delta$  -113.4 ppm. HRMS (ESI)  $m/z$ :  $[M + H]^+$  calcd for:  $C_{17}H_{14}FN_2O_2$  297.1034, found 297.1030.

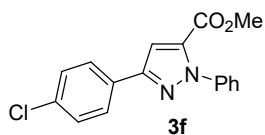

**Methyl 3-(4-chlorophenyl)-1-phenyl-1H-pyrazole-5-carboxylate (3f)**. Purification by flash chromatography (PE/EA = 15:1) gave a white solid (57.4 mg, 92% yield); m.p. 92-93 °C;  $^1H$  NMR (400 MHz,  $CDCl_3$ )  $\delta$  7.81 (d,  $J = 8.0$  Hz, 2H),

7.48 (s, 5H), 7.39 (d,  $J = 8.0$  Hz, 2H), 7.29 (s, 1H), 3.82 (s, 3H) ppm.  $^{13}C\{^1H\}$  NMR (100 MHz,  $CDCl_3$ )  $\delta$  159.4, 150.4, 140.1, 134.4, 134.2, 130.7, 129.0, 128.9, 128.7, 127.1, 126.0, 109.4, 52.1 ppm. HRMS (ESI)  $m/z$ :  $[M + H]^+$  calcd for:  $C_{17}H_{14}ClN_2O_2$  313.0738, found 313.0735.

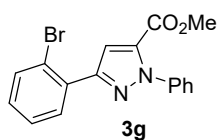

**Methyl 3-(2-bromophenyl)-1-phenyl-1H-pyrazole-5-carboxylate (3g)**. Purification by flash chromatography (PE/EA = 15:1) gave a white solid (66.2 mg, 93% yield); m.p. 85-86 °C; <sup>1</sup>H NMR (400 MHz, CDCl<sub>3</sub>) δ 7.79 (d, *J* = 8.0 Hz, 1H), 7.68 (d, *J* = 8.0 Hz, 1H), 7.54 – 7.43 (m, 6H), 7.36 (t, *J* = 7.6 Hz, 1H), 7.22 (t, *J* = 8.0 Hz, 1H), 3.82 (s, 3H) ppm. <sup>13</sup>C{<sup>1</sup>H} NMR (100 MHz, CDCl<sub>3</sub>) δ 159.6, 150.6, 140.1, 133.6, 133.23, 133.15, 131.2, 129.7, 128.8, 128.6, 127.5, 126.0, 122.0, 113.4, 52.1 ppm. HRMS (ESI) *m/z*: [M + H]<sup>+</sup> calcd for: C<sub>17</sub>H<sub>14</sub>BrN<sub>2</sub>O<sub>2</sub> 357.0233(<sup>79</sup>Br) and 359.0213(<sup>81</sup>Br), found 357.0224, 359.0203.

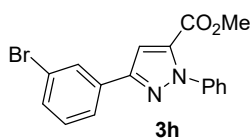

**Methyl 3-(3-bromophenyl)-1-phenyl-1H-pyrazole-5-carboxylate (3h)**. Purification by flash chromatography (PE/EA = 15:1) gave a white solid (64.8 mg, 91% yield); m.p. 91-92 °C; <sup>1</sup>H NMR (400 MHz, CDCl<sub>3</sub>) δ 8.05 (s, 1H), 7.78 (d, *J* = 7.6 Hz, 1H), 7.49 (s, 6H), 7.31 – 7.26 (m, 2H), 3.82 (s, 3H) ppm. <sup>13</sup>C{<sup>1</sup>H} NMR (100 MHz, CDCl<sub>3</sub>) δ 159.4, 150.0, 140.1, 134.4, 134.2, 131.3, 130.3, 128.9, 128.8, 128.7, 126.0, 124.3, 123.0, 109.6, 52.2 ppm. HRMS (ESI) *m/z*: [M + H]<sup>+</sup> calcd for: C<sub>17</sub>H<sub>14</sub>BrN<sub>2</sub>O<sub>2</sub> 357.0233(<sup>79</sup>Br) and 359.0213(<sup>81</sup>Br), found 357.0223, 359.0202.

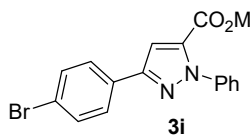

**Methyl 3-(4-bromophenyl)-1-phenyl-1H-pyrazole-5-carboxylate (3i)**. Purification by flash chromatography (PE/EA = 15:1) gave a white solid (66.9 mg, 94% yield); m.p. 79-80 °C; <sup>1</sup>H NMR (400 MHz, CDCl<sub>3</sub>) δ 7.74 (d, *J* = 8.4 Hz, 2H), 7.55 (d, *J* = 8.4 Hz, 2H), 7.48 (s, 5H), 7.29 (s, 1H), 3.82 (s, 3H) ppm. <sup>13</sup>C{<sup>1</sup>H} NMR (100 MHz, CDCl<sub>3</sub>) δ 159.4, 150.4, 140.1, 134.4, 131.9, 131.1, 128.9, 128.7, 127.3, 126.0, 122.4, 109.4, 52.1. HRMS (ESI) *m/z*: [M + H]<sup>+</sup> calcd for: C<sub>17</sub>H<sub>14</sub>BrN<sub>2</sub>O<sub>2</sub> 357.0233(<sup>79</sup>Br) and 359.0213(<sup>81</sup>Br), found 357.0223, 359.0204.

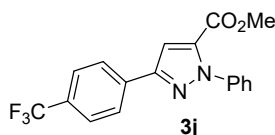

**Methyl 1-phenyl-3-(4-(trifluoromethyl)phenyl)-1H-pyrazole-5-carboxylate (3j)**. Purification by flash chromatography (PE/EA = 15:1) gave a white solid (64.4 mg, 93% yield); m.p. 76-77 °C; <sup>1</sup>H NMR (400 MHz, CDCl<sub>3</sub>) δ 7.99 (d, *J* = 7.6 Hz, 2H), 7.68 (d, *J* = 8.0 Hz, 2H), 7.50 (s, 5H), 7.37 (s, 1H), 3.83 (s, 3H) ppm. <sup>13</sup>C{<sup>1</sup>H} NMR (100 MHz, CDCl<sub>3</sub>) δ 159.3, 150.1, 140.1, 135.6, 134.6, 130.2 (q, *J* = 32.1 Hz), 129.0, 128.7, 128.23 (s), 126.0 (q, *J* = 7.5 Hz), 125.7 (q, *J* = 3.6 Hz), 124.2 (q, *J* = 270.4 Hz), 109.8, 52.2 ppm. <sup>19</sup>F NMR (376 MHz, CDCl<sub>3</sub>) δ -62.6 ppm. HRMS (ESI) *m/z*: [M + H]<sup>+</sup> calcd for: C<sub>18</sub>H<sub>14</sub>F<sub>3</sub>N<sub>2</sub>O<sub>2</sub> 347.1002, found 347.0997.

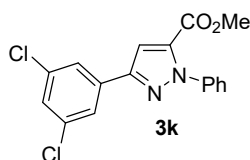

**Methyl 3-(3,5-dichlorophenyl)-1-phenyl-1H-pyrazole-5-carboxylate (3k)**. Purification by flash chromatography (PE/EA = 15:1) gave a white solid (65.7 mg, 95% yield); m.p. 153-154 °C; <sup>1</sup>H NMR (400 MHz, CDCl<sub>3</sub>) δ 7.76 (s, 2H), 7.49 (d, *J* = 4.2 Hz, 5H), 7.33 (s, 1H), 7.30 (s, 1H), 3.82 (s, 3H) ppm. <sup>13</sup>C{<sup>1</sup>H} NMR (100 MHz, CDCl<sub>3</sub>) δ 159.2, 149.0, 140.0, 135.4, 135.0, 134.6, 129.1, 128.7, 128.2, 126.0, 124.1, 109.7, 52.2 ppm. HRMS (ESI) *m/z*: [M + H]<sup>+</sup> calcd for: C<sub>17</sub>H<sub>13</sub>Cl<sub>2</sub>N<sub>2</sub>O<sub>2</sub> 347.0349, found 347.0341.

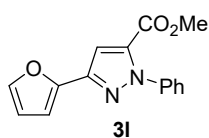

**Methyl 3-(furan-2-yl)-1-phenyl-1H-pyrazole-5-carboxylate (3l)**. Purification by flash chromatography (PE/EA = 10:1) gave a white solid (45.6 mg, 85% yield); m.p. 56-57

°C;  $^1\text{H}$  NMR (400 MHz,  $\text{CDCl}_3$ )  $\delta$  7.48 – 7.46 (m, 6H), 7.23 (s, 1H), 6.78 (d,  $J = 3.2$  Hz, 1H), 6.49 – 6.48 (m, 1H), 3.80 (s, 3H) ppm.  $^{13}\text{C}\{^1\text{H}\}$  NMR (100 MHz,  $\text{CDCl}_3$ )  $\delta$  159.3, 147.5, 144.1, 142.4, 140.0, 134.0, 128.9, 128.6, 126.1, 111.5, 109.1, 106.8, 52.1 ppm. HRMS (ESI)  $m/z$ :  $[\text{M} + \text{H}]^+$  calcd for:  $\text{C}_{15}\text{H}_{13}\text{N}_2\text{O}_3$  269.0921, found 269.0916.

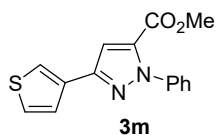

**3m**

**Methyl 1-phenyl-3-(thiophen-3-yl)-1H-pyrazole-5-carboxylate (3m).** Purification by flash chromatography (PE/EA = 15:1) gave a white solid (51.2 mg, 90% yield); m.p. 66–67 °C;  $^1\text{H}$  NMR (400 MHz,  $\text{CDCl}_3$ )  $\delta$  7.67 (d,  $J = 1.2$  Hz, 1H), 7.52 (d,  $J = 4.8$  Hz, 1H), 7.47 – 7.44 (m, 5H), 7.38 – 7.36 (m, 1H), 7.20 (s, 1H), 3.80 (s, 3H) ppm.  $^{13}\text{C}\{^1\text{H}\}$  NMR (100 MHz,  $\text{CDCl}_3$ )  $\delta$  159.5, 147.9, 140.2, 133.94, 133.88, 128.7, 128.6, 126.2, 126.1, 125.9, 121.5, 109.8, 52.1 ppm. HRMS (ESI)  $m/z$ :  $[\text{M} + \text{H}]^+$  calcd for:  $\text{C}_{15}\text{H}_{13}\text{N}_2\text{O}_2\text{S}$  285.0692, found 285.0683.

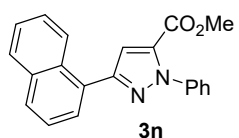

**3n**

**Methyl 3-(naphthalen-1-yl)-1-phenyl-1H-pyrazole-5-carboxylate (3n).** Purification by flash chromatography (PE/EA = 15:1) gave a white solid (59.7 mg, 91% yield); m.p. 134–135 °C;  $^1\text{H}$  NMR (400 MHz,  $\text{CDCl}_3$ )  $\delta$  8.52 (d,  $J = 7.6$  Hz, 1H), 7.89 – 7.87 (m, 2H), 7.76 (d,  $J = 7.2$  Hz, 1H), 7.58 – 7.45 (m, 8H), 7.34 (s, 1H), 3.84 (s, 3H) ppm.  $^{13}\text{C}\{^1\text{H}\}$  NMR (100 MHz,  $\text{CDCl}_3$ )  $\delta$  159.7, 151.4, 140.2, 133.9, 133.6, 131.2, 130.0, 129.0, 128.7, 128.6, 127.4, 126.6, 126.1, 125.9, 125.7, 125.3, 113.3, 52.1 ppm. HRMS (ESI)  $m/z$ :  $[\text{M} + \text{H}]^+$  calcd for:  $\text{C}_{21}\text{H}_{17}\text{N}_2\text{O}_2$  329.1285, found 329.1276.

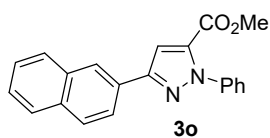

**3o**

**Methyl 3-(naphthalen-2-yl)-1-phenyl-1H-pyrazole-5-carboxylate (3o).** Purification by flash chromatography (PE/EA = 15:1) gave a white solid (59.0 mg, 90% yield); m.p. 67–68 °C;  $^1\text{H}$  NMR (400 MHz,  $\text{CDCl}_3$ )  $\delta$  8.34 (s, 1H), 8.02 (d,  $J = 8.5$  Hz, 1H), 7.91 – 7.83 (m, 3H), 7.55 – 7.45 (m, 8H), 3.83 (s, 3H) ppm.  $^{13}\text{C}\{^1\text{H}\}$  NMR (100 MHz,  $\text{CDCl}_3$ )  $\delta$  159.6, 151.5, 140.3, 134.4, 133.5, 133.4, 129.5, 128.8, 128.7, 128.5, 128.3, 127.8, 126.4, 126.2, 126.1, 124.6, 123.8, 109.8, 52.1 ppm. HRMS (ESI)  $m/z$ :  $[\text{M} + \text{H}]^+$  calcd for:  $\text{C}_{21}\text{H}_{17}\text{N}_2\text{O}_2$  329.1285, found 329.1276.

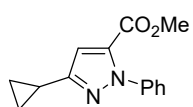

**3p**

**Methyl 3-cyclopropyl-1-phenyl-1H-pyrazole-5-carboxylate (3p).** Purification by flash chromatography (PE/EA = 15:1) gave a white solid (41.4 mg, 85% yield); m.p. 41–42 °C;  $^1\text{H}$  NMR (400 MHz,  $\text{CDCl}_3$ )  $\delta$  7.45 – 7.37 (m, 5H), 6.66 (s, 1H), 3.75 (s, 3H), 2.04 – 1.97 (m, 1H), 0.97 (dt,  $J = 9.2, 5.2$  Hz, 2H), 0.82 – 0.78 (m, 2H) ppm.  $^{13}\text{C}\{^1\text{H}\}$  NMR (100 MHz,  $\text{CDCl}_3$ )  $\delta$  159.6, 155.5, 140.3, 133.3, 128.5, 128.4, 125.9, 108.8, 51.9, 9.0, 8.2 ppm. HRMS (ESI)  $m/z$ :  $[\text{M} + \text{H}]^+$  calcd for:  $\text{C}_{14}\text{H}_{15}\text{N}_2\text{O}_2$  243.1128, found 243.1125.

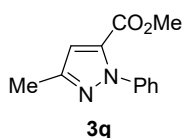

**3q**

**Methyl 3-methyl-1-phenyl-1H-pyrazole-5-carboxylate (3q).** Purification by flash chromatography (PE/EA = 5:1) gave colourless oil (37.2 mg, 86% yield);  $^1\text{H}$  NMR (400 MHz,  $\text{CDCl}_3$ )  $\delta$  7.46 – 7.39 (m, 5H), 6.80 (s, 1H), 3.77 (s, 3H), 2.36 (s, 3H) ppm.  $^{13}\text{C}\{^1\text{H}\}$  NMR (100 MHz,  $\text{CDCl}_3$ )  $\delta$  159.7, 148.9, 140.3, 133.4, 128.5, 128.4, 125.9, 112.1, 51.9, 13.4 ppm. HRMS (ESI)  $m/z$ :  $[\text{M} + \text{H}]^+$  calcd for:  $\text{C}_{12}\text{H}_{13}\text{N}_2\text{O}_2$  217.0972, found 217.0968.

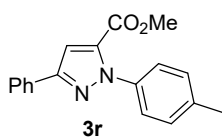

**Methyl 3-phenyl-1-(*p*-tolyl)-1*H*-pyrazole-5-carboxylate (3r).** Purification by flash chromatography (PE/EA = 15:1) gave a white solid (53.7 mg, 92% yield); m.p. 94-95 °C; <sup>1</sup>H NMR (400 MHz, CDCl<sub>3</sub>) δ 7.87 (d, *J* = 8.0 Hz, 2H), 7.44 – 7.33 (m, 5H), 7.30 – 7.27 (m, 3H), 3.82 (s, 3H), 2.43 (s, 3H) ppm. <sup>13</sup>C{<sup>1</sup>H} NMR (100 MHz, CDCl<sub>3</sub>) δ 159.6, 151.3, 138.8, 137.8, 134.1, 132.2, 129.2, 128.7, 128.3, 125.9, 125.8, 109.3, 52.0, 21.3 ppm. HRMS (ESI) *m/z*: [M + H]<sup>+</sup> calcd for: C<sub>18</sub>H<sub>17</sub>N<sub>2</sub>O<sub>2</sub> 293.1285, found 293.1277.

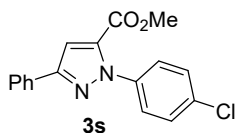

**Methyl 1-(4-chlorophenyl)-3-phenyl-1*H*-pyrazole-5-carboxylate (3s).** Purification by flash chromatography (PE/EA = 15:1) gave a white solid (59.3 mg, 95% yield); m.p. 157-158 °C; <sup>1</sup>H NMR (400 MHz, CDCl<sub>3</sub>) δ 7.86 (d, *J* = 7.6 Hz, 2H), 7.45 – 7.41 (m, 6H), 7.36 (d, *J* = 7.2 Hz, 1H), 7.32 (s, 1H), 3.83 (s, 3H) ppm. <sup>13</sup>C{<sup>1</sup>H} NMR (100 MHz, CDCl<sub>3</sub>) δ 159.5, 151.8, 138.7, 134.6, 134.2, 131.9, 128.8, 128.6, 127.4, 125.8, 109.8, 52.2 ppm. HRMS (ESI) *m/z*: [M + H]<sup>+</sup> calcd for: C<sub>17</sub>H<sub>14</sub>ClN<sub>2</sub>O<sub>2</sub> 313.0738, found 313.0731.

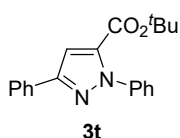

**tert-Butyl 1,3-diphenyl-1*H*-pyrazole-5-carboxylate (3t).** Purification by flash chromatography (PE/EA = 15:1) gave a white solid (59.5 mg, 93% yield); m.p. 57-58 °C; <sup>1</sup>H NMR (400 MHz, CDCl<sub>3</sub>) δ 7.87 (d, *J* = 8.0 Hz, 2H), 7.48 – 7.40 (m, 7H), 7.34 (t, *J* = 7.2 Hz, 1H), 7.26 (s, 1H), 1.41 (s, 9H) ppm. <sup>13</sup>C{<sup>1</sup>H} NMR (100 MHz, CDCl<sub>3</sub>) δ 158.4, 151.3, 140.8, 136.4, 132.3, 128.7, 128.6, 128.5, 128.3, 126.2, 125.8, 109.3, 82.5, 27.9 ppm. HRMS (ESI) *m/z*: [M + H]<sup>+</sup> calcd for: C<sub>20</sub>H<sub>21</sub>N<sub>2</sub>O<sub>2</sub> 321.1598, found 321.1589.

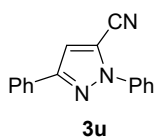

**1,3-Diphenyl-1*H*-pyrazole-5-carbonitrile (3u).** Purification by flash chromatography (PE/EA = 15:1) gave a tawny solid (46.1 mg, 94% yield); m.p. 98-99 °C; <sup>1</sup>H NMR (400 MHz, CDCl<sub>3</sub>) δ 7.88 (d, *J* = 7.6 Hz, 2H), 7.80 (d, *J* = 8.0 Hz, 2H), 7.56 (t, *J* = 7.6 Hz, 2H), 7.50 – 7.41 (m, 4H), 7.30 (s, 1H) ppm. <sup>13</sup>C{<sup>1</sup>H} NMR (100 MHz, CDCl<sub>3</sub>) δ 152.7, 138.6, 131.1, 129.6, 129.1, 128.9, 125.9, 122.8, 115.0, 113.1, 111.1 ppm. HRMS (ESI) *m/z*: [M + H]<sup>+</sup> calcd for: C<sub>16</sub>H<sub>12</sub>N<sub>3</sub> 246.1026, found 246.1018.

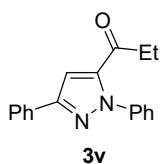

**1-(1,3-Diphenyl-1*H*-pyrazol-5-yl)propan-1-one (3v).** Purification by flash chromatography (PE/EA = 10:1) gave a yellow solid (52.4 mg, 95% yield); m.p. 45-46 °C; <sup>1</sup>H NMR (400 MHz, CDCl<sub>3</sub>) δ 7.89 (d, *J* = 7.6 Hz, 2H), 7.50 – 7.43 (m, 7H), 7.37 (t, *J* = 7.2 Hz, 1H), 7.27 (s, 1H), 2.93 (q, *J* = 7.2 Hz, 2H), 1.18 (t, *J* = 7.2 Hz, 3H) ppm. <sup>13</sup>C{<sup>1</sup>H} NMR (100 MHz, CDCl<sub>3</sub>) δ 191.2, 151.4, 140.8, 140.7, 132.1, 128.8, 128.7, 128.6, 126.0, 125.8, 108.8, 34.1, 7.9 ppm. HRMS (ESI) *m/z*: [M + H]<sup>+</sup> calcd for: C<sub>18</sub>H<sub>17</sub>N<sub>2</sub>O 277.1335, found 277.1330.

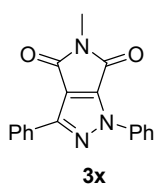

**5-Methyl-1,3-diphenylpyrrolo[3,4-*c*]pyrazole-4,6(1*H*,5*H*)-dione (3x).** Purification by flash chromatography (PE/EA = 5:1) gave a white solid (57.6 mg, 95% yield); m.p. 129-130 °C; <sup>1</sup>H NMR (400 MHz, CDCl<sub>3</sub>) δ 8.30 (d, *J* = 7.6 Hz, 2H), 8.24 (d, *J* = 8.0 Hz, 2H), 7.54 – 7.38 (m, 6H), 3.14 (s, 3H) ppm. <sup>13</sup>C{<sup>1</sup>H} NMR (100 MHz, CDCl<sub>3</sub>) δ 162.2, 157.9, 147.5, 142.7, 138.1,

130.0, 129.8, 129.4, 128.8, 128.5, 127.4, 121.2, 120.2, 24.5 ppm. HRMS (ESI)  $m/z$ :  $[M + H]^+$  calcd for:  $C_{18}H_{14}N_3O_2$  304.1081, found 304.1074.

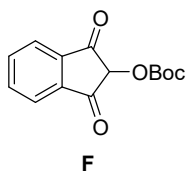

**tert-Butyl (1,3-dioxo-2,3-dihydro-1H-inden-2-yl) carbonate (F)**. Purification by flash chromatography (PE/EA = 2:1) gave a white solid (47.2 mg, 90% yield); m.p. 112-113 °C;  $^1H$  NMR (400 MHz,  $CDCl_3$ )  $\delta$  8.01 (dd,  $J = 5.2, 3.2$  Hz, 2H), 7.90 (dd,  $J = 5.2, 3.2$  Hz, 2H), 5.07 (s, 1H), 1.45 (s, 9H) ppm.  $^{13}C\{^1H\}$  NMR (100 MHz,  $CDCl_3$ )  $\delta$  192.9, 152.2, 139.7, 136.4, 123.8, 84.6, 76.1, 27.5 ppm. HRMS (ESI)  $m/z$ :  $[M + H]^+$  calcd for:  $C_{14}H_{15}O_5$  263.0914, found 263.0910.

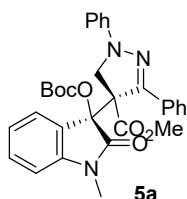

**rac-methyl (S)-4-((S)-3-((tert-butoxycarbonyl)oxy)-1-methyl-2-oxoindolin-3-yl)-1,3-diphenyl-4,5-dihydro-1H-pyrazole-4-carboxylate (5a)**. Purification by flash chromatography (PE/EA = 15:1) gave a white solid (99.5 mg, 92% yield); m.p. 132-133 °C;  $^1H$  NMR (400 MHz,  $CDCl_3$ )  $\delta$  7.91 (d,  $J = 7.2$  Hz, 1H), 7.74 (d,  $J = 7.6$  Hz, 2H), 7.40 – 7.31 (m, 3H), 7.15 (t,  $J = 7.6$  Hz, 1H), 7.02 (t,  $J = 7.6$  Hz, 1H), 6.83 (t,  $J = 7.6$  Hz, 2H), 6.62 (t,  $J = 7.2$  Hz, 1H), 6.49 (d,  $J = 8.0$  Hz, 2H), 6.32 (d,  $J = 7.6$  Hz, 1H), 4.96 (d,  $J = 16.0$  Hz, 1H), 3.72 (d,  $J = 18.0$  Hz, 1H), 3.64 (s, 3H), 2.94 (s, 3H), 1.33 (s, 9H) ppm.  $^{13}C\{^1H\}$  NMR (100 MHz,  $CDCl_3$ )  $\delta$  172.5, 169.5, 150.1, 149.0, 146.0, 143.5, 131.6, 130.6, 128.9, 128.5, 127.7, 127.0, 126.2, 125.8, 122.3, 120.4, 116.6, 107.8, 83.8, 80.4, 75.8, 52.6, 44.7, 27.6, 26.3 ppm. HRMS (ESI)  $m/z$ :  $[M + H]^+$  calcd for:  $C_{31}H_{32}N_3O_6$  542.2286, found 542.2277.

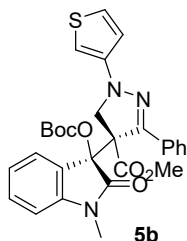

**rac-Methyl (S)-4-((S)-3-((tert-butoxycarbonyl)oxy)-1-methyl-2-oxoindolin-3-yl)-3-phenyl-1-(thiophen-3-yl)-4,5-dihydro-1H-pyrazole-4-carboxylate (5b)**. Purification by flash chromatography (PE/EA = 15:1) gave a white solid (99.6 mg, 91% yield); m.p. 145-146 °C;  $^1H$  NMR (400 MHz,  $CDCl_3$ )  $\delta$  7.65 (d,  $J = 5.2$  Hz, 1H), 7.53 (s, 1H), 7.38 – 7.32 (m, 3H), 7.02 (t,  $J = 8.0$  Hz, 2H), 6.84 – 6.77 (m, 5H), 4.67 (d,  $J = 16.4$  Hz, 1H), 3.80 (d,  $J = 18.0$  Hz, 1H), 3.38 (s, 3H), 3.21 (s, 3H), 1.20 (s, 9H) ppm.  $^{13}C\{^1H\}$  NMR (100 MHz,  $CDCl_3$ )  $\delta$  172.8, 169.8, 150.1, 145.8, 145.6, 134.0, 130.8, 128.0, 127.0, 126.2, 126.1, 124.4, 124.2, 122.2, 120.7, 116.3, 108.0, 83.2, 81.7, 79.4, 52.6, 44.7, 27.4, 26.4. HRMS (ESI)  $m/z$ :  $[M + H]^+$  calcd for:  $C_{29}H_{30}N_3O_6S$  548.1850, found 548.1847.

### 3. Transformations of product 3a

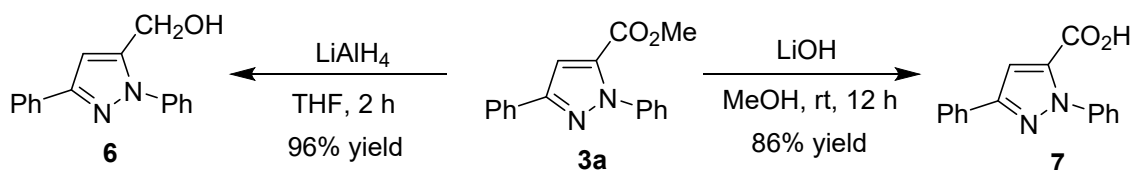

To a stirred suspension of **3a** (0.3 mmol, 83.4 mg) in 3 mL of anhydrous THF was added in portions 22.8 mg (0.6 mmol) of lithium aluminum hydride at 0°C, after stirring for 2 h from 0°C to room temperature until the

reaction was completed as monitored by TLC analysis. The reaction mixture is stirred for another 15 min, diluted with ether (5 mL), and quenched by dropwise addition of water (5 mL). It was extracted with ether (3 x 5 mL). The combined organic layers were dried over Na<sub>2</sub>SO<sub>4</sub>, filtered. The filtrate was concentrated under vacuum, and the residue was purified by a flash column chromatography on silica gel (PE /EA = 2:1) to give the product **(1,3-diphenyl-1H-pyrazol-5-yl)methanol (6)** (72.0 mg, 96% yield) as a white solid. m.p. 91-92 °C; <sup>1</sup>H NMR (400 MHz, CDCl<sub>3</sub>) δ 7.86 (d, *J* = 7.6 Hz, 2H), 7.63 (d, *J* = 7.6 Hz, 2H), 7.49 – 7.31 (m, 6H), 6.73 (s, 1H), 4.65 (s, 2H), 2.12 (br, 1H) ppm. <sup>13</sup>C{<sup>1</sup>H} NMR (100 MHz, CDCl<sub>3</sub>) δ 151.7, 143.3, 139.5, 132.9, 129.3, 128.7, 128.03, 127.92, 125.8, 124.5, 104.9, 55.8 ppm. HRMS (ESI) *m/z*: [M + H]<sup>+</sup> calcd for: calcd. for C<sub>16</sub>H<sub>15</sub>N<sub>2</sub>O 251.1179, found 251.1176.

To a solution of compound **3a** (0.3 mmol, 83.4 mg) in MeOH (2 ml) at 0°C was slowly added aqueous LiOH (1M, 2 ml) over 15 min. The reaction mixture was allowed to warm to room temperature overnight with stirring. The organic solvent was removed *in vacuo* and the residual aqueous solution was partitioned with Et<sub>2</sub>O, then the organic phase was extracted with H<sub>2</sub>O (two times). The combined aqueous extract was acidified to pH 2 with 1N HCl. The aqueous phase was extracted with CHCl<sub>3</sub> (three times). The combined organic extract was dried over MgSO<sub>4</sub> and concentrated to afford the desired acid **7** (68.2 mg, 86%). m.p. 137-138 °C; <sup>1</sup>H NMR (400 MHz, CDCl<sub>3</sub>) δ 10.25 (br, 1H), 7.36 – 7.30 (m, 8H), 7.23 (d, *J* = 7.2 Hz, 2H), 7.12 (s, 1H) ppm. <sup>13</sup>C{<sup>1</sup>H} NMR (100 MHz, CDCl<sub>3</sub>) δ 166.6, 145.1, 143.3, 139.3, 129.3, 129.0, 128.9, 128.8, 128.6, 128.5, 125.6, 110.4 ppm. HRMS (ESI) *m/z*: [M + H]<sup>+</sup> calcd for: calcd. for C<sub>16</sub>H<sub>13</sub>N<sub>2</sub>O<sub>2</sub> 265.0972, found 265.0970.

#### 4. Crystal data and structural refinement for **3b** and **5b**

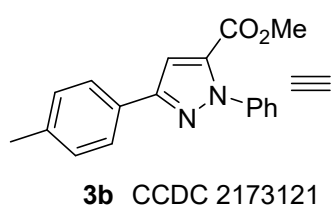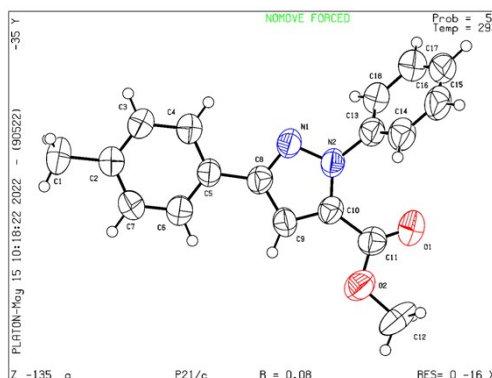

|                     |                                                               |
|---------------------|---------------------------------------------------------------|
| Identification code | <b>3b</b>                                                     |
| Empirical formula   | C <sub>18</sub> H <sub>16</sub> N <sub>2</sub> O <sub>2</sub> |
| Formula weight      | 292.33                                                        |
| Temperature/K       | 293(2)                                                        |
| Crystal system      | Monoclinic                                                    |
| Space group         | P21/c                                                         |



|                                            |                                        |
|--------------------------------------------|----------------------------------------|
| a/Å                                        | 5.8340(10)                             |
| b/Å                                        | 18.3400(9)                             |
| c/Å                                        | 14.5000(11)                            |
| $\alpha$ /°                                | 90                                     |
| $\beta$ /°                                 | 97.21(3)                               |
| $\gamma$ /°                                | 90                                     |
| Volume/Å <sup>3</sup>                      | 1539.2(3)                              |
| Z                                          | 4                                      |
| $\rho_{\text{calc}}$ /g/cm <sup>3</sup>    | 1.262                                  |
| $\mu$ /mm <sup>-1</sup>                    | 0.083                                  |
| F(000)                                     | 616                                    |
| Crystal size/mm <sup>3</sup>               | 0.32 × 0.25 × 0.21                     |
| Radiation                                  | MoK $\alpha$ ( $\lambda$ = 0.71073)    |
| 2 $\Theta$ range for data collection/°     | 1.80 to 24.99                          |
| Index ranges                               | -6 ≤ h ≤ 6, -21 ≤ k ≤ 13, -17 ≤ l ≤ 17 |
| Reflections collected                      | 7344                                   |
| Independent reflections                    | 948 [ $R_{\text{int}}$ = 0.0786]       |
| Data/restraints/parameters                 | 2694 / 0 / 200                         |
| Goodness-of-fit on F <sup>2</sup>          | 0.825                                  |
| Final R indexes [ $I \geq 2\sigma(I)$ ]    | $R_1$ = 0.0786, $wR_2$ = 0.1681        |
| R indices (all data)                       | $R_1$ = 0.2123, $wR_2$ = 0.2139        |
| Largest diff. peak and hole/ 1-sigma level | 0.202 / -0.187 / 0.053                 |

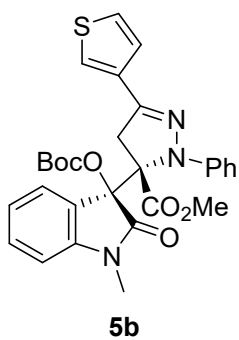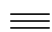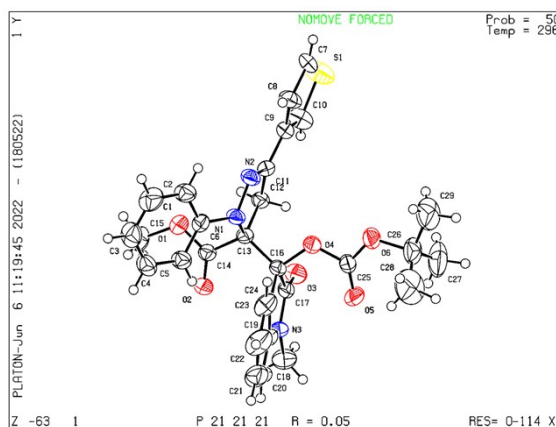

CCDC 2177446

|                                    |                                                                 |
|------------------------------------|-----------------------------------------------------------------|
| Identification code                | <b>5b</b>                                                       |
| Empirical formula                  | C <sub>29</sub> H <sub>29</sub> N <sub>3</sub> O <sub>6</sub> S |
| Formula weight                     | 547.61                                                          |
| Temperature/K                      | 293                                                             |
| Crystal system                     | orthorhombic                                                    |
| Space group                        | P 21 21 21                                                      |
| a/Å                                | 11.1944(15)                                                     |
| b/Å                                | 12.3535(17)                                                     |
| c/Å                                | 20.244(3)                                                       |
| α/°                                | 90                                                              |
| β/°                                | 90                                                              |
| γ/°                                | 90                                                              |
| Volume/Å <sup>3</sup>              | 2799.5(7)                                                       |
| Z                                  | 4                                                               |
| ρ <sub>calc</sub> /cm <sup>3</sup> | 1.299                                                           |
| μ/mm <sup>-1</sup>                 | 0.163                                                           |
| F(000)                             | 1152.0                                                          |
| Crystal size/mm <sup>3</sup>       | 0.26 × 0.25 × 0.22                                              |
| Radiation                          | MoKα (λ = 0.71073)                                              |
| 2θ range for data collection/°     | 2.46 to 22.67                                                   |

|                                            |                                                             |
|--------------------------------------------|-------------------------------------------------------------|
| Index ranges                               | $-8 \leq h \leq 13, -14 \leq k \leq 14, -22 \leq l \leq 24$ |
| Reflections collected                      | 14358                                                       |
| Independent reflections                    | 4004 [ $R_{\text{int}} = 0.0339$ ]                          |
| Data/restraints/parameters                 | 4918 / 2 / 357                                              |
| Goodness-of-fit on $F^2$                   | 1.067                                                       |
| Final R indexes [ $I \geq 2\sigma(I)$ ]    | $R_1 = 0.0622, wR_2 = 0.1327$                               |
| R indices (all data)                       | $R_1 = 0.0472, wR_2 = 0.1252$                               |
| Largest diff. peak and hole/ 1-sigma level | 0.431 / - 0.373 / 0.050                                     |

## 5. NMR spectra

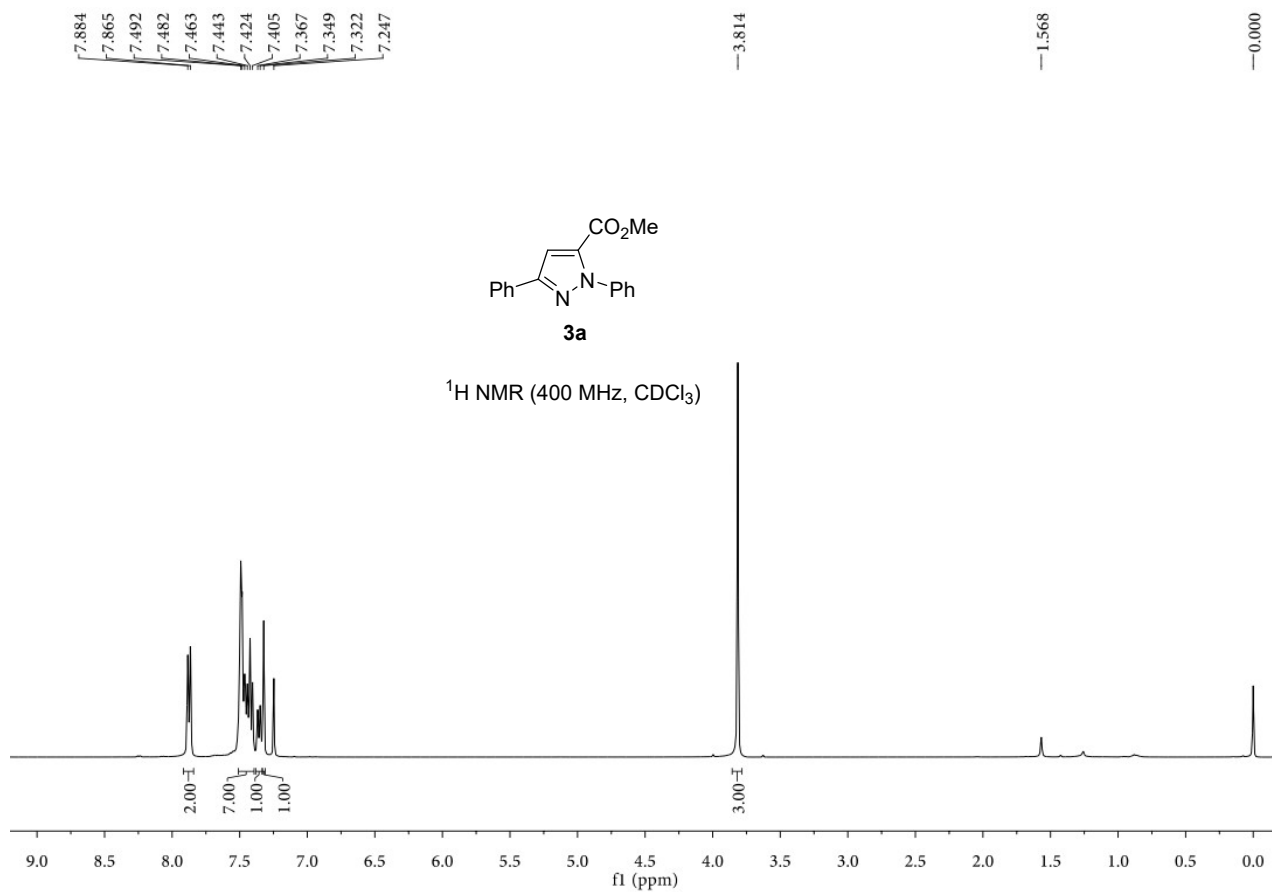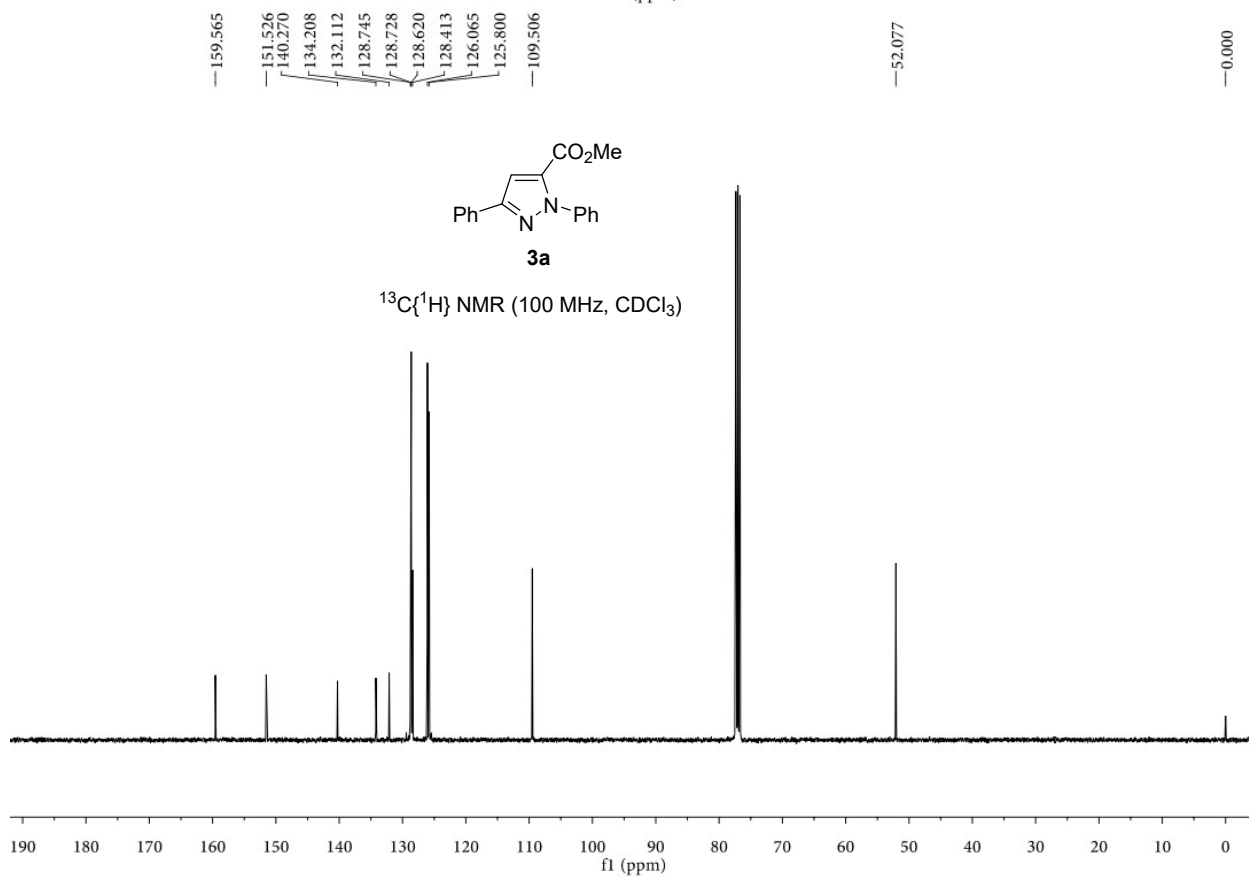

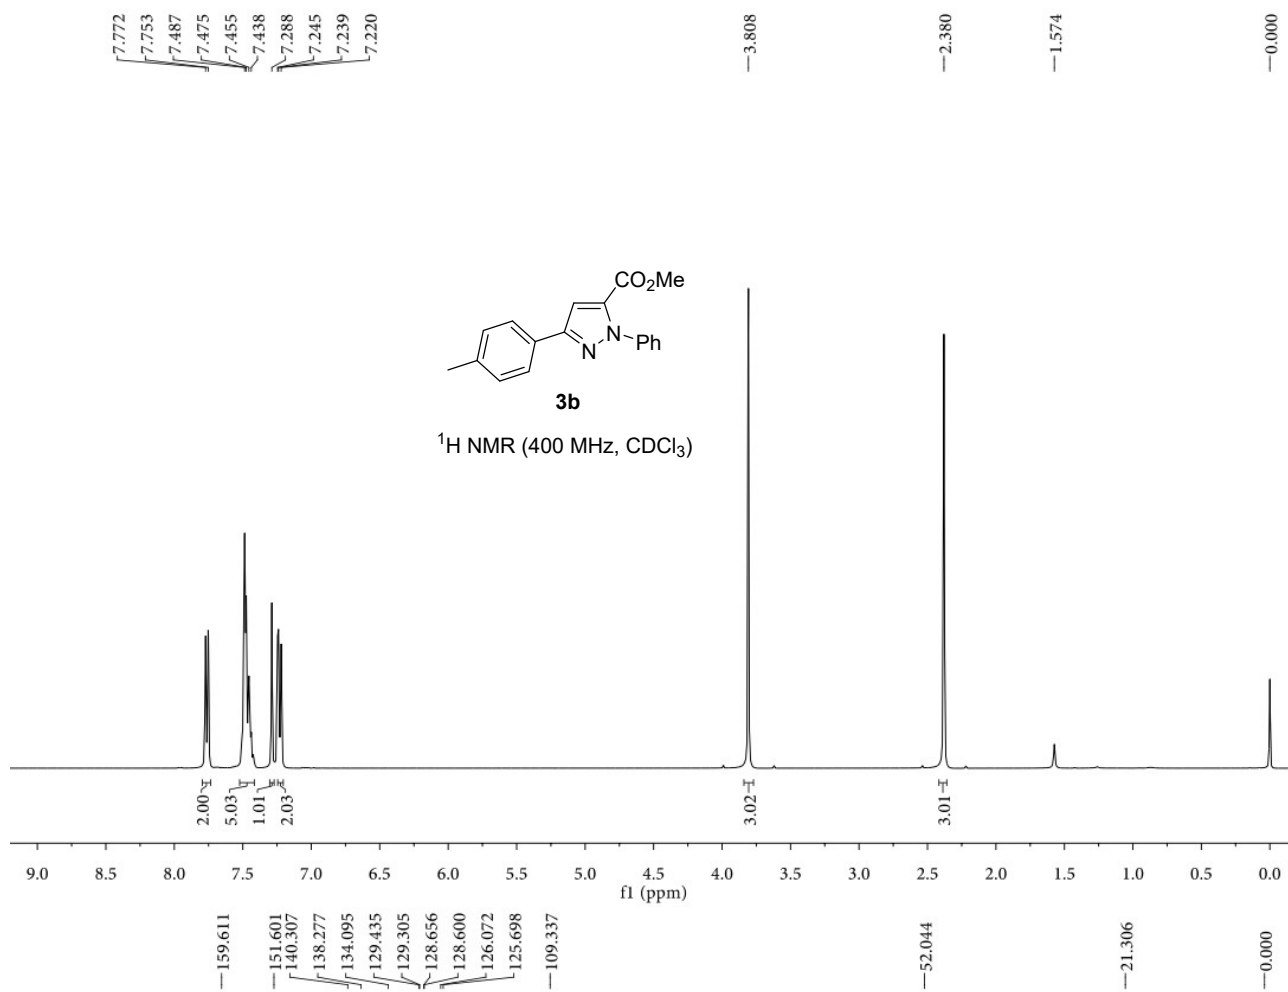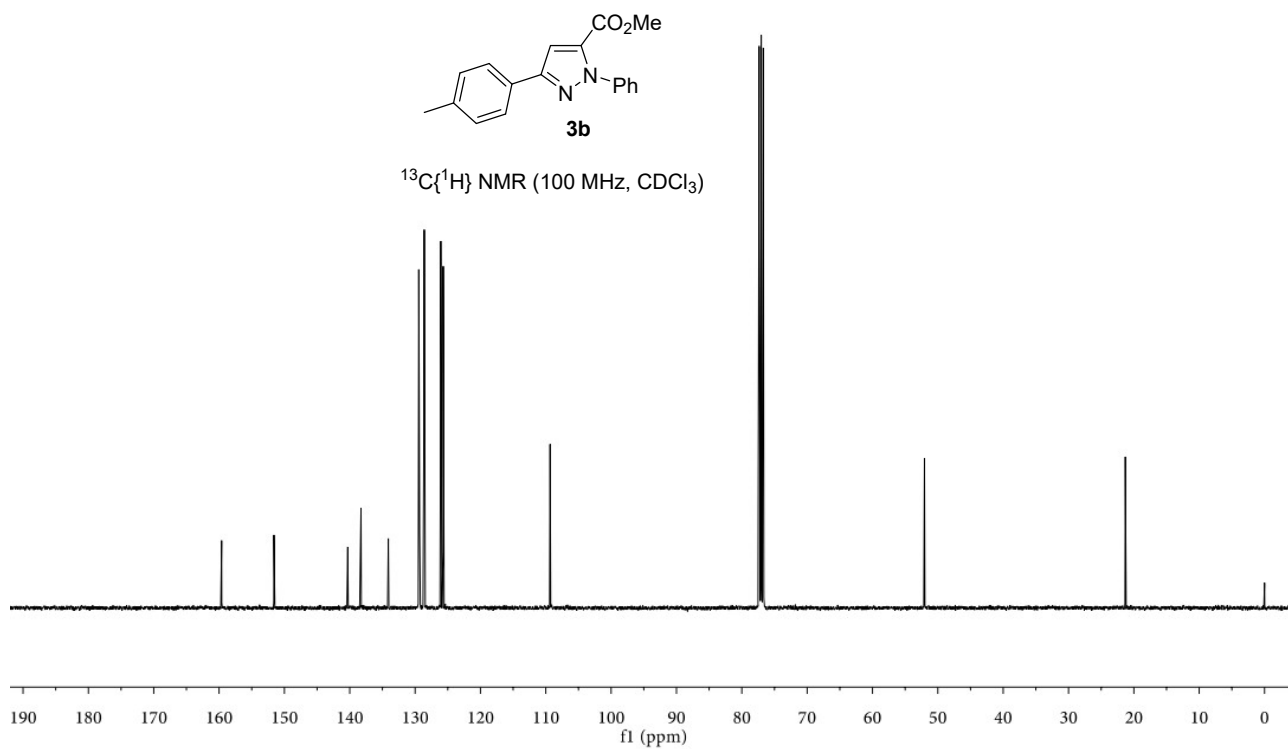

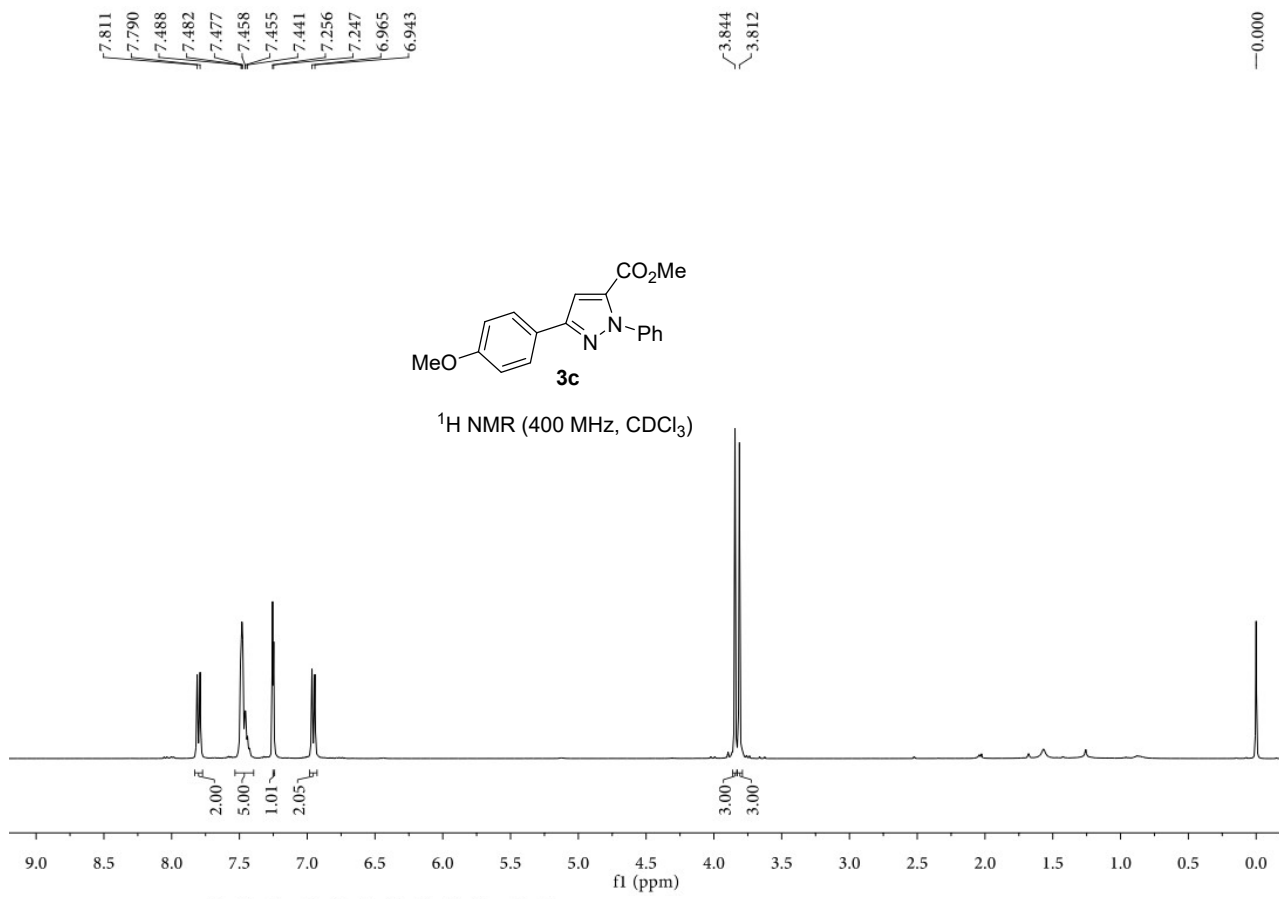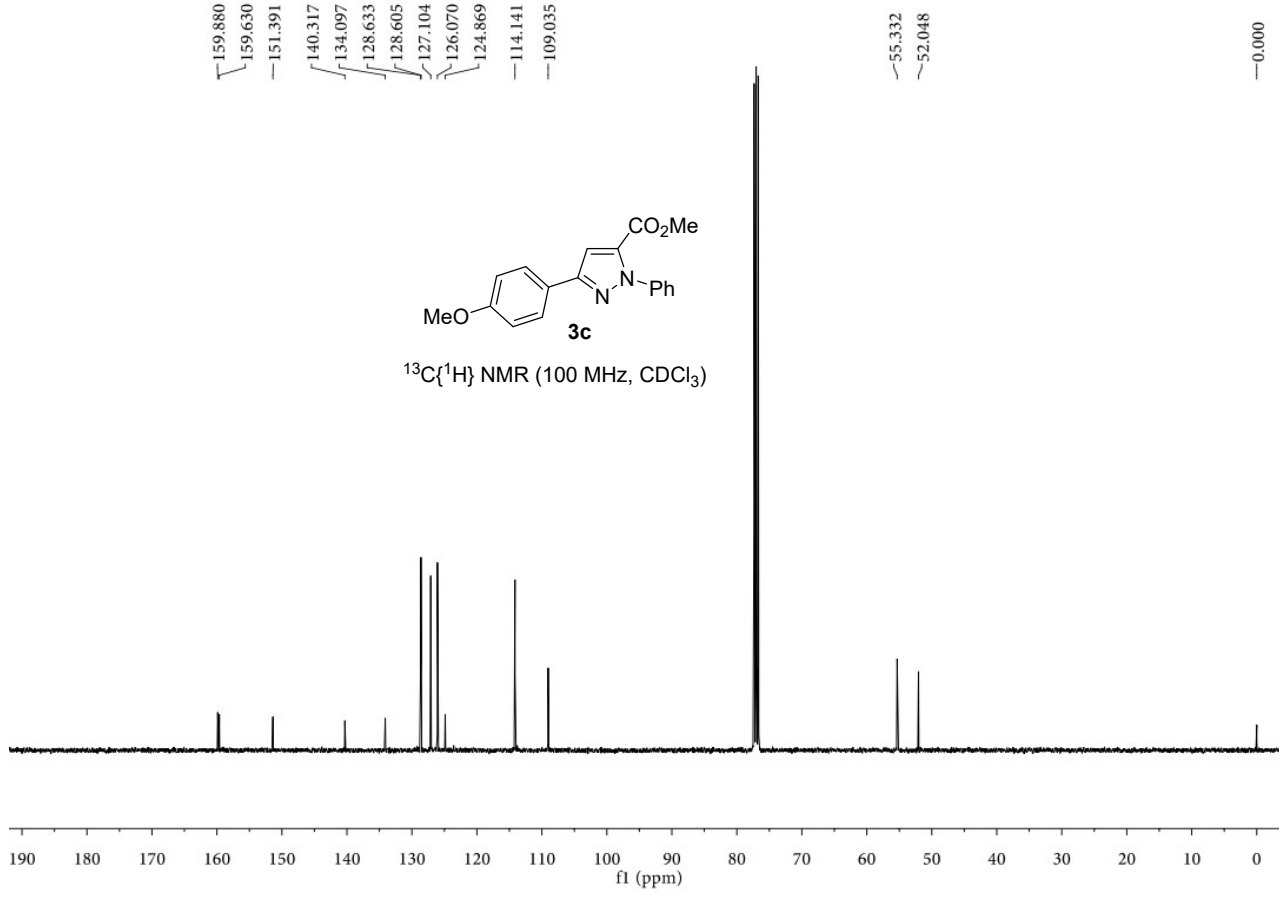

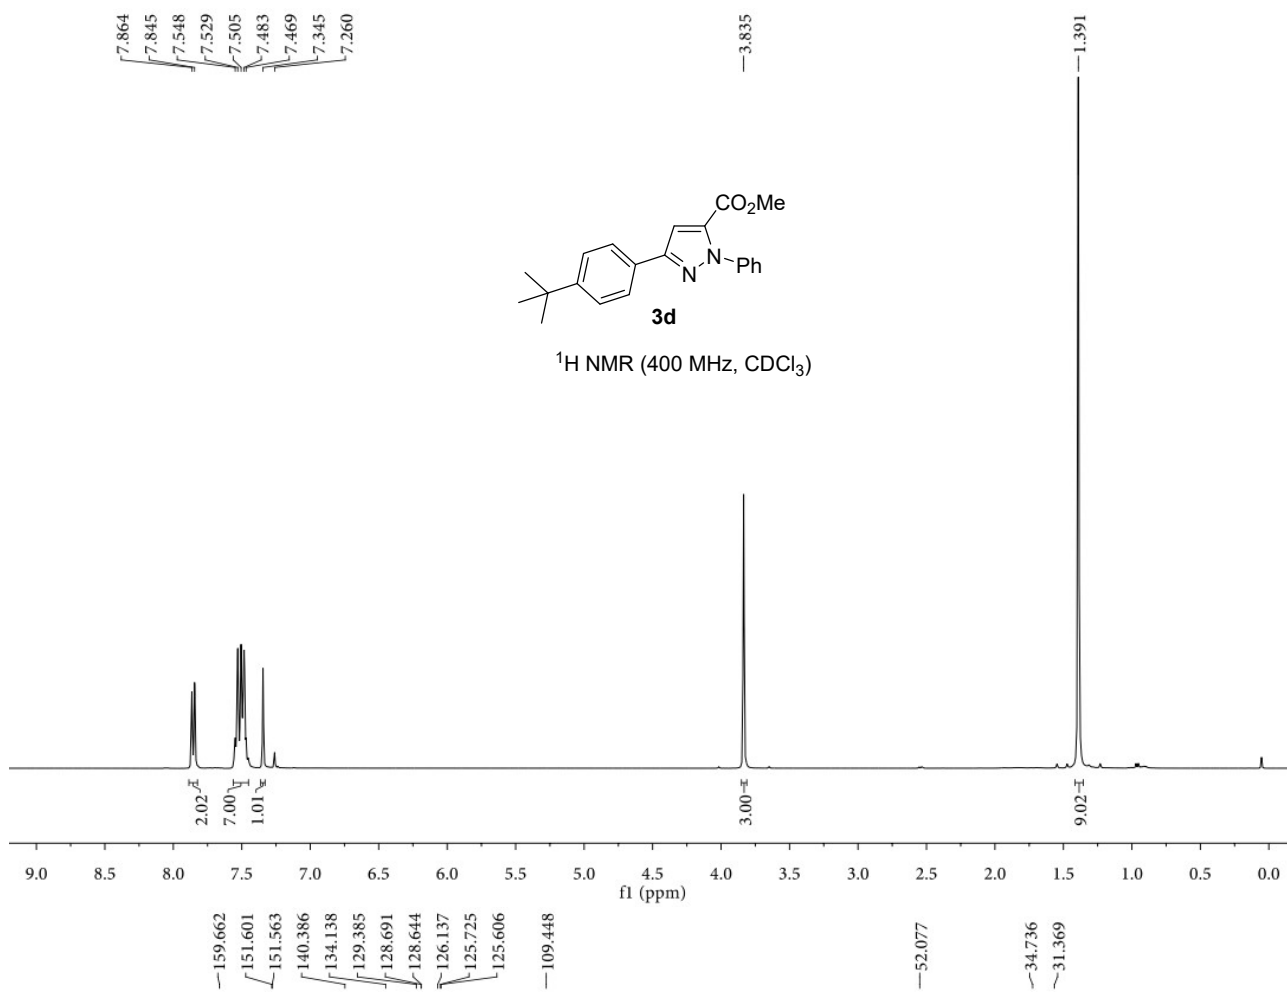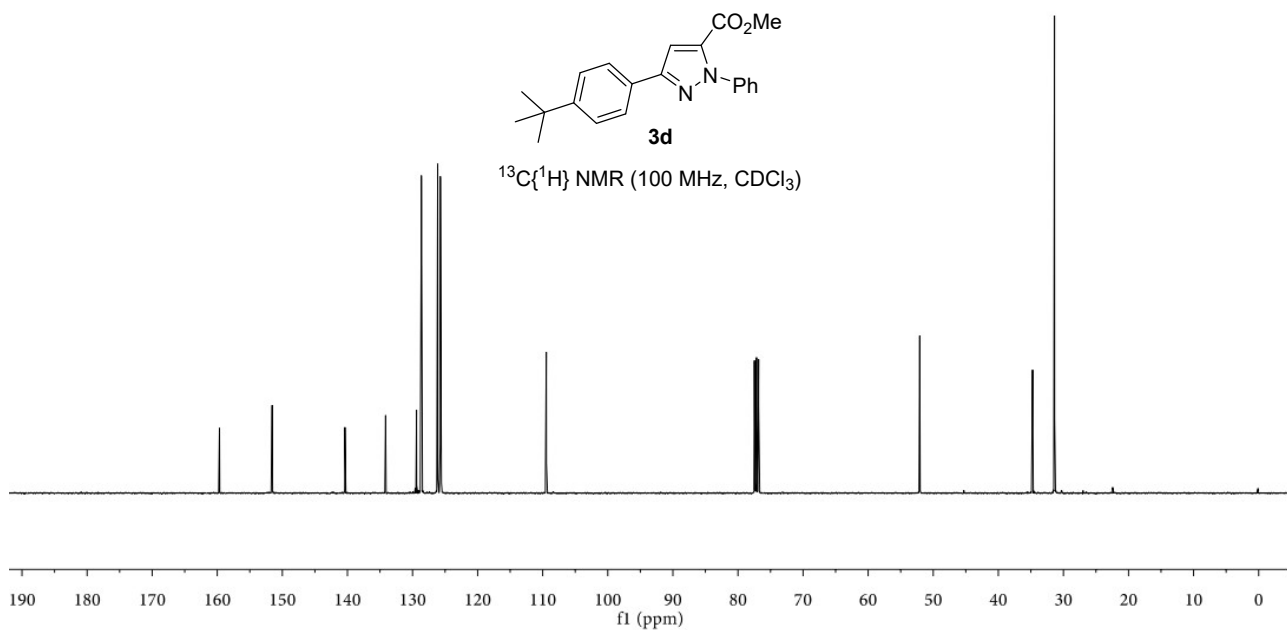

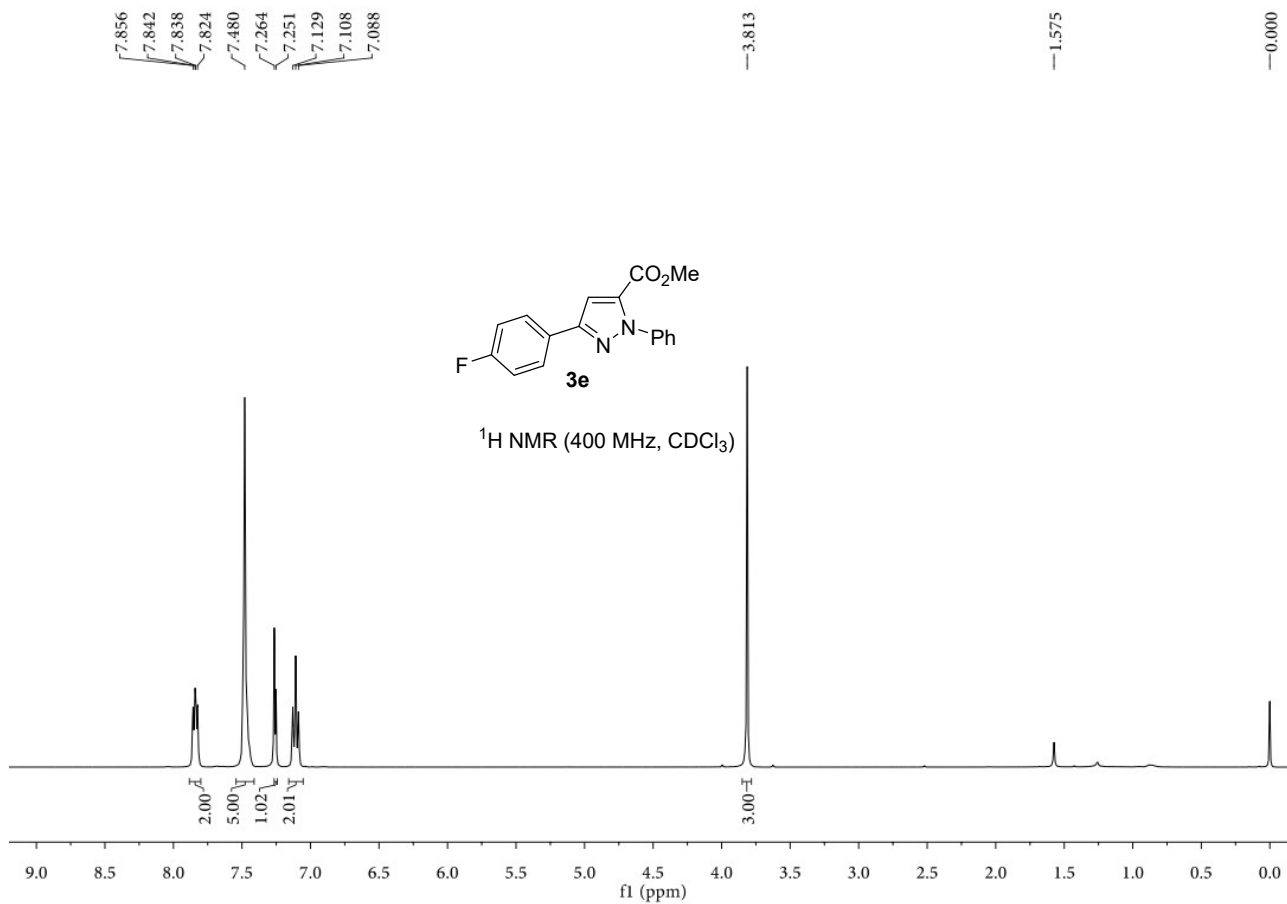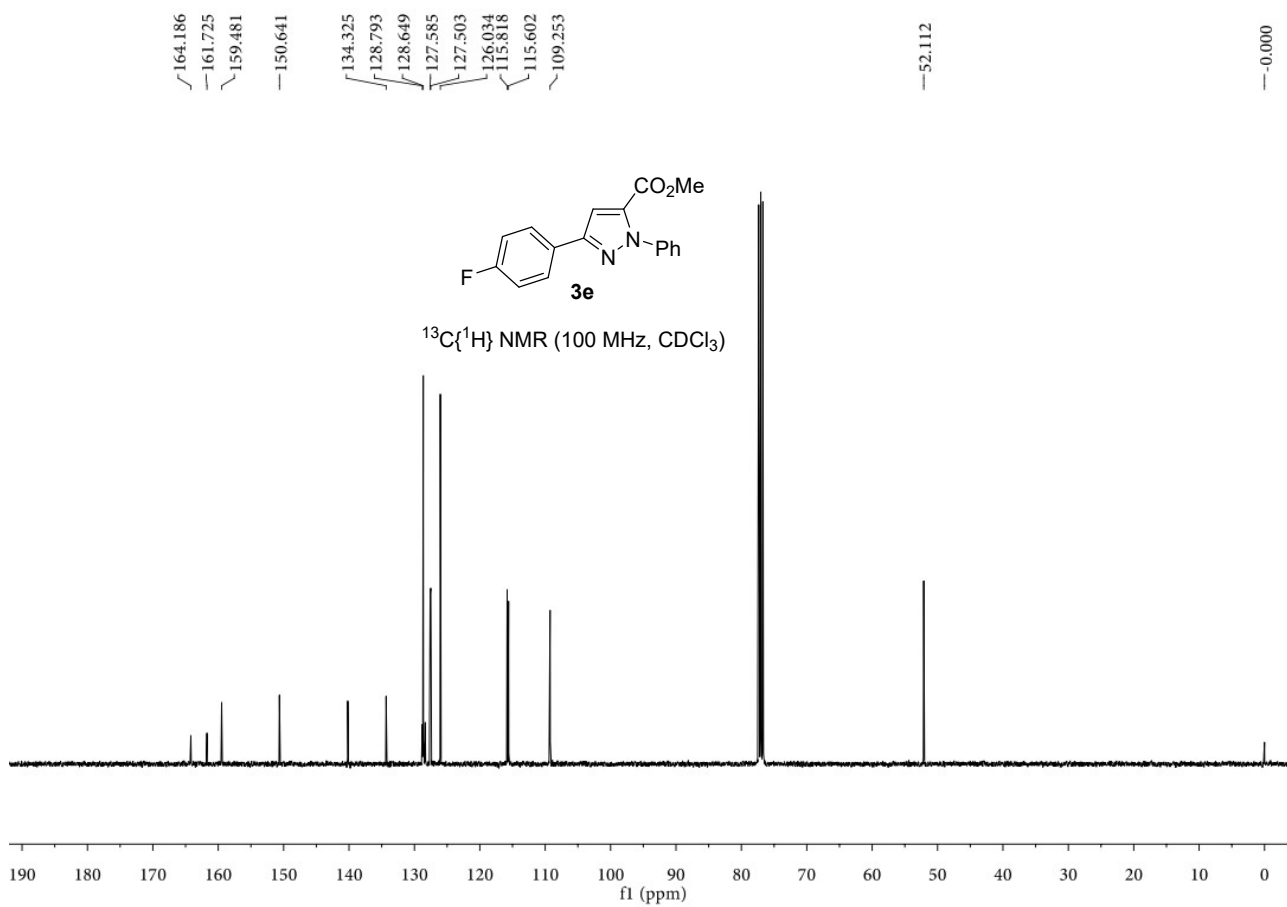



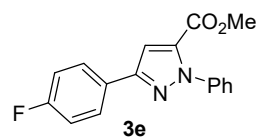

<sup>19</sup>F NMR (376MHz, CDCl<sub>3</sub>)

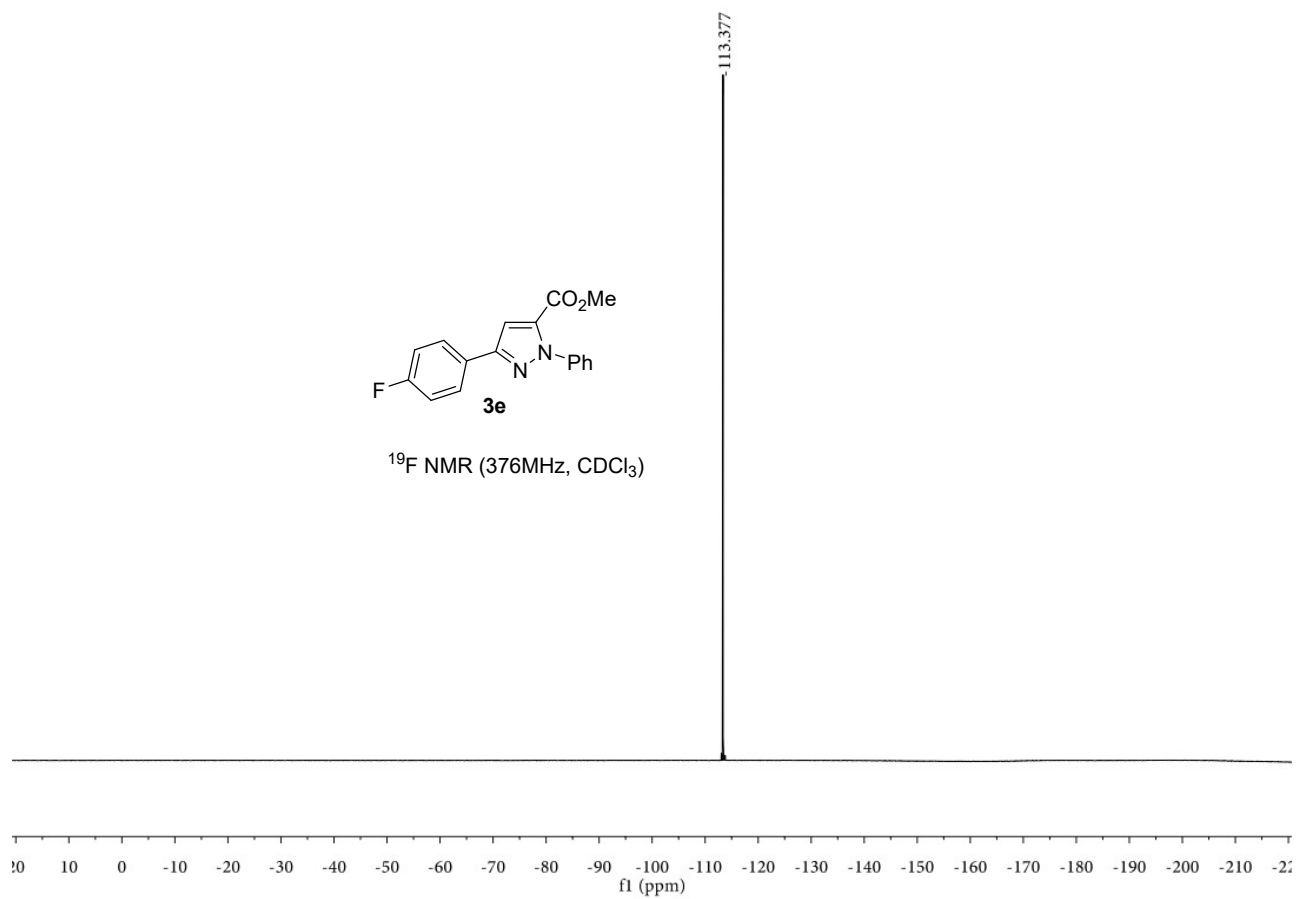

7.815  
7.795  
7.483  
7.403  
7.383  
7.291  
7.256

-3.818

-1.554

-0.000

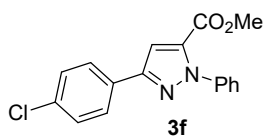

<sup>1</sup>H NMR (400 MHz, CDCl<sub>3</sub>)

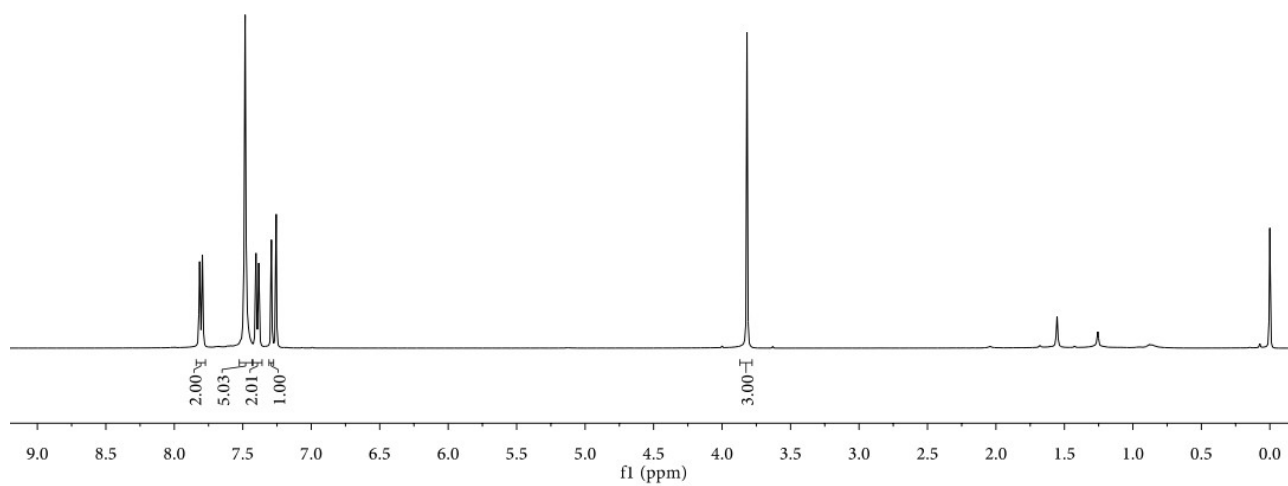

159.428  
150.429  
134.397  
134.239  
130.650  
128.952  
128.855  
128.667  
127.050  
126.025  
109.408

-52.141

-0.000

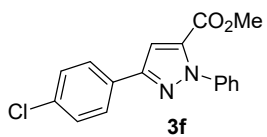

<sup>13</sup>C{<sup>1</sup>H} NMR (100 MHz, CDCl<sub>3</sub>)

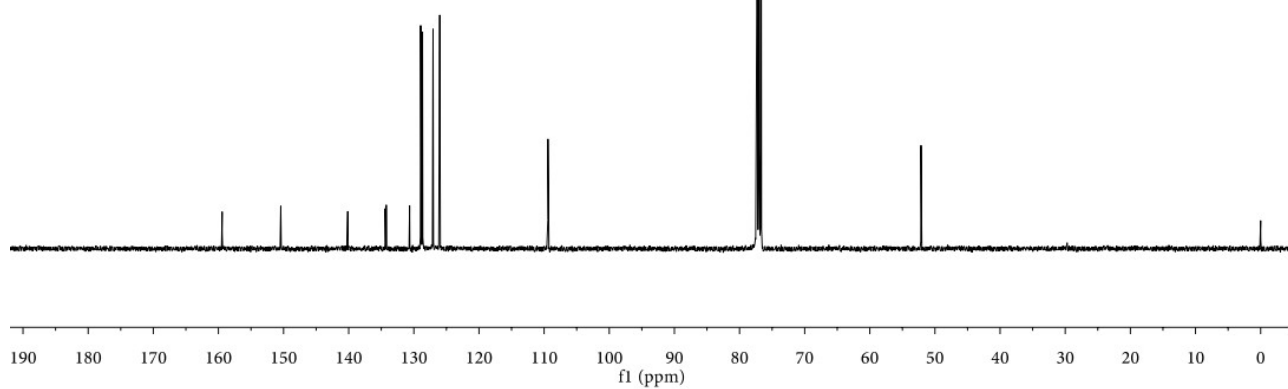

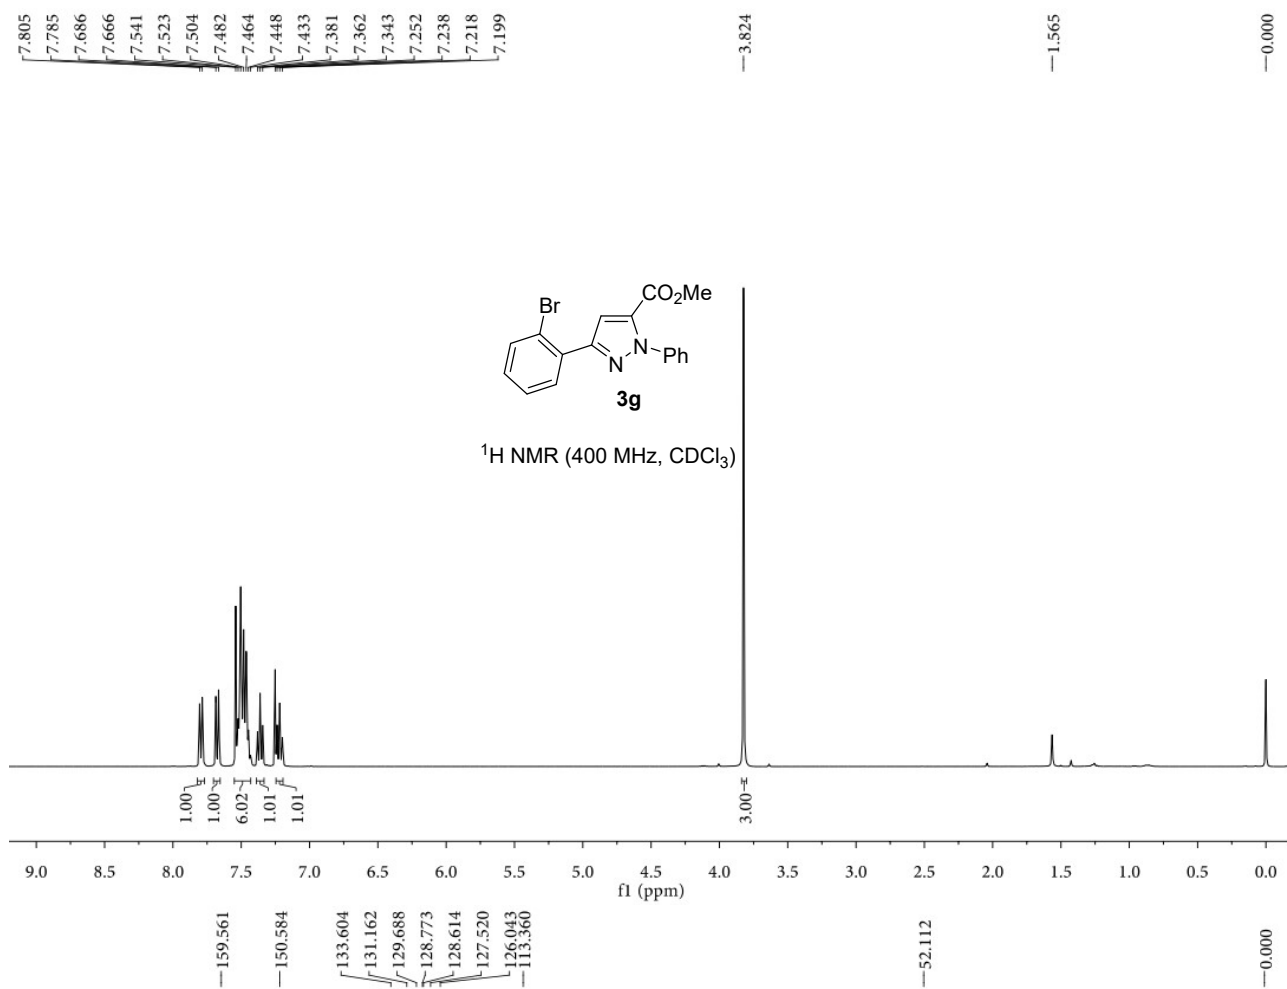

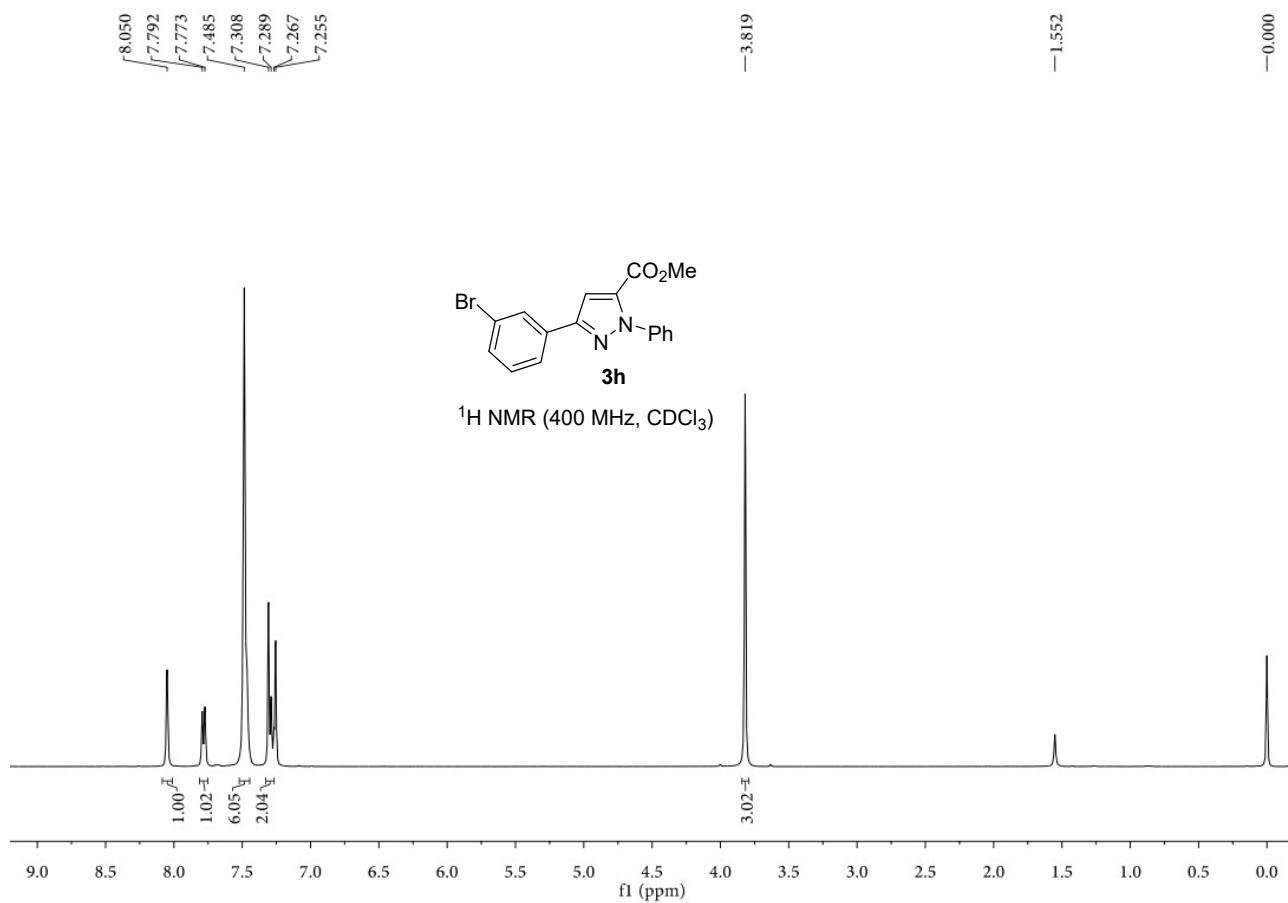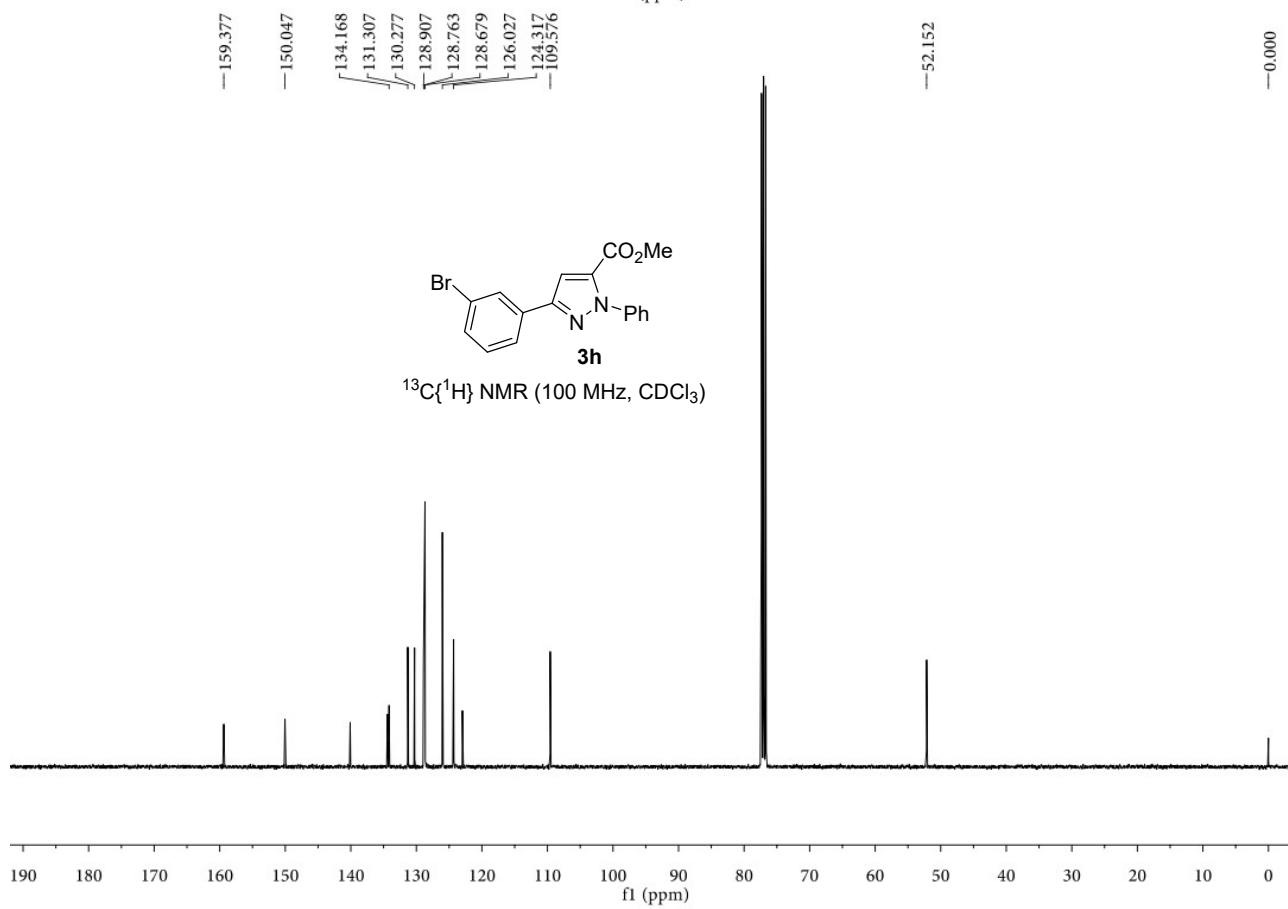

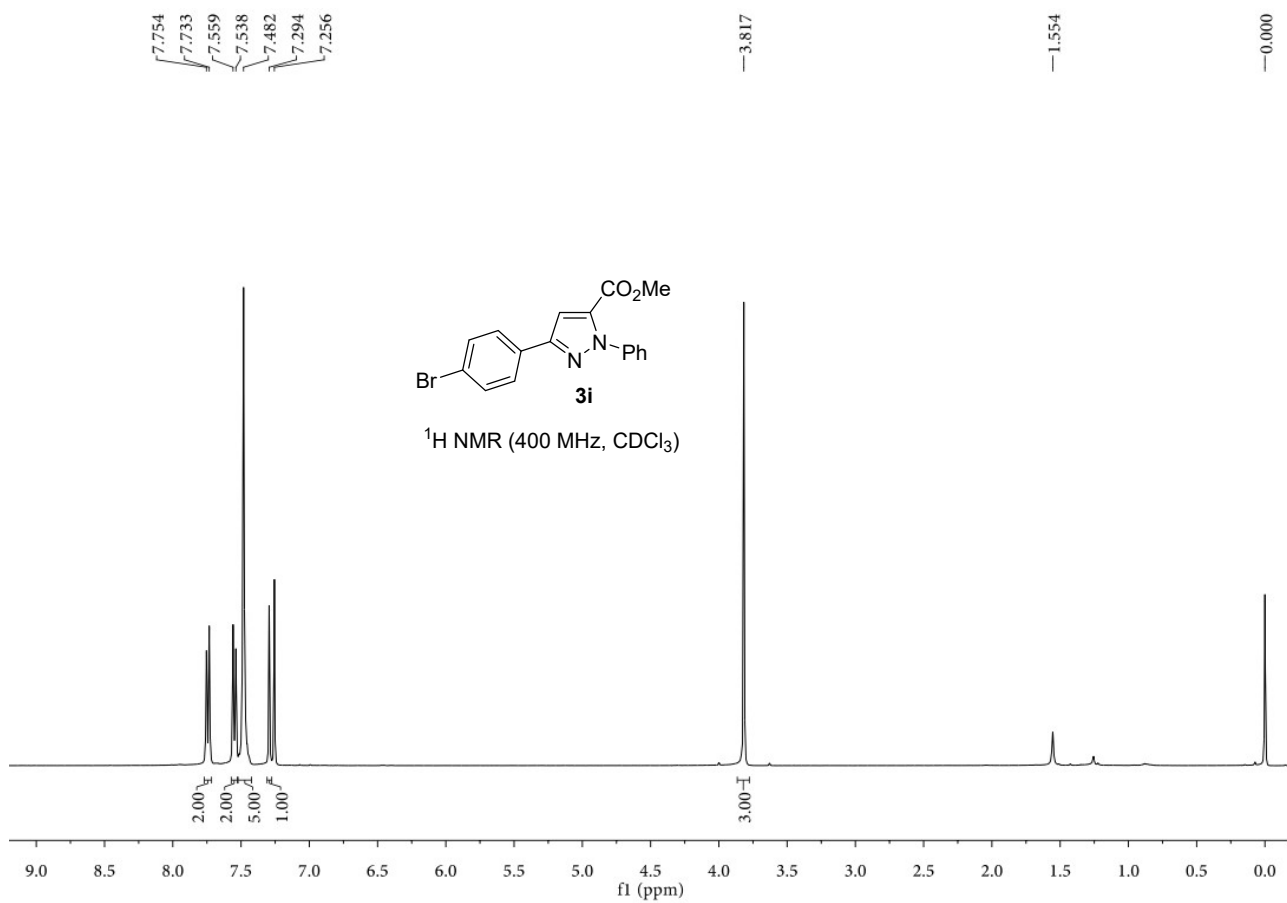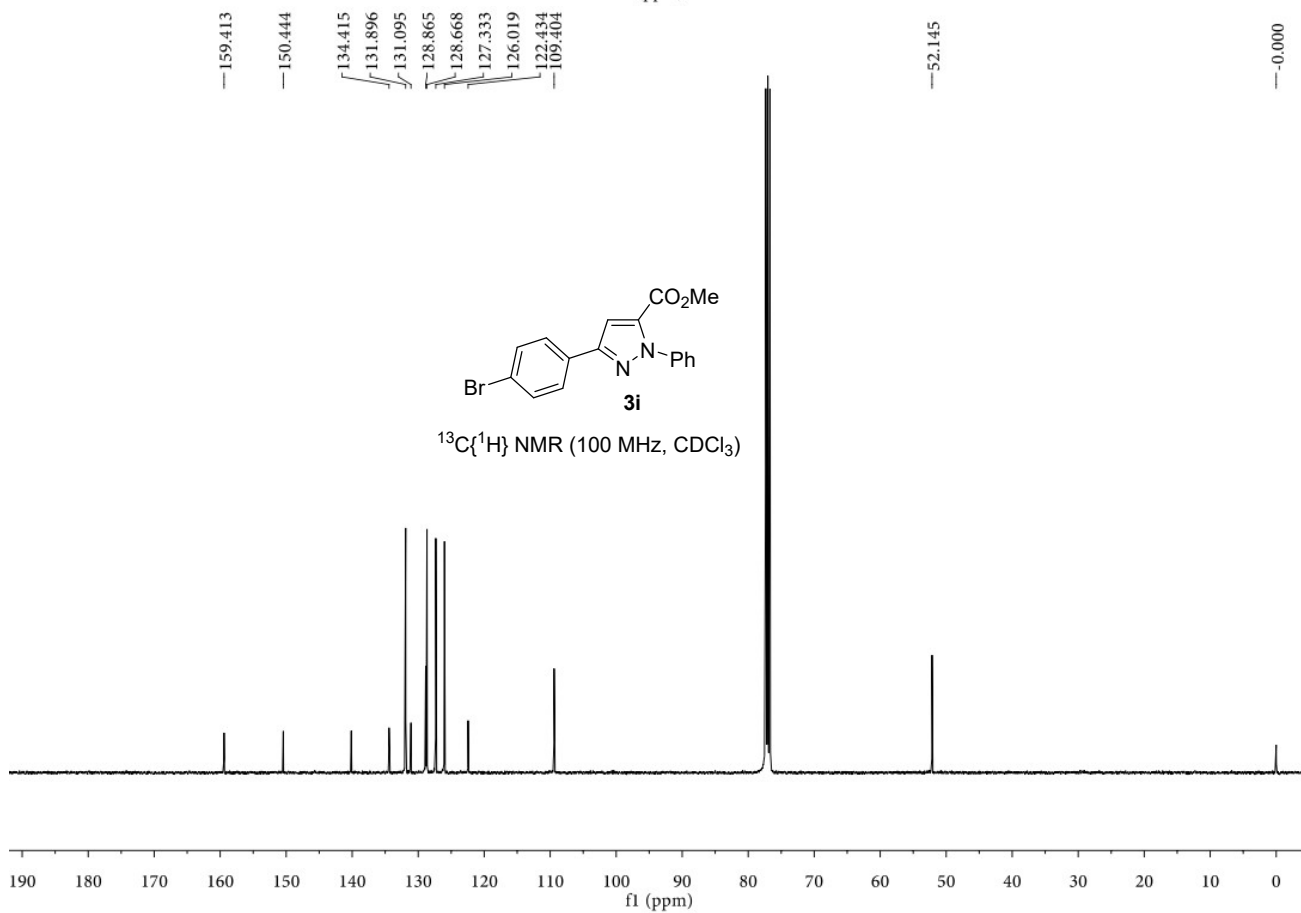

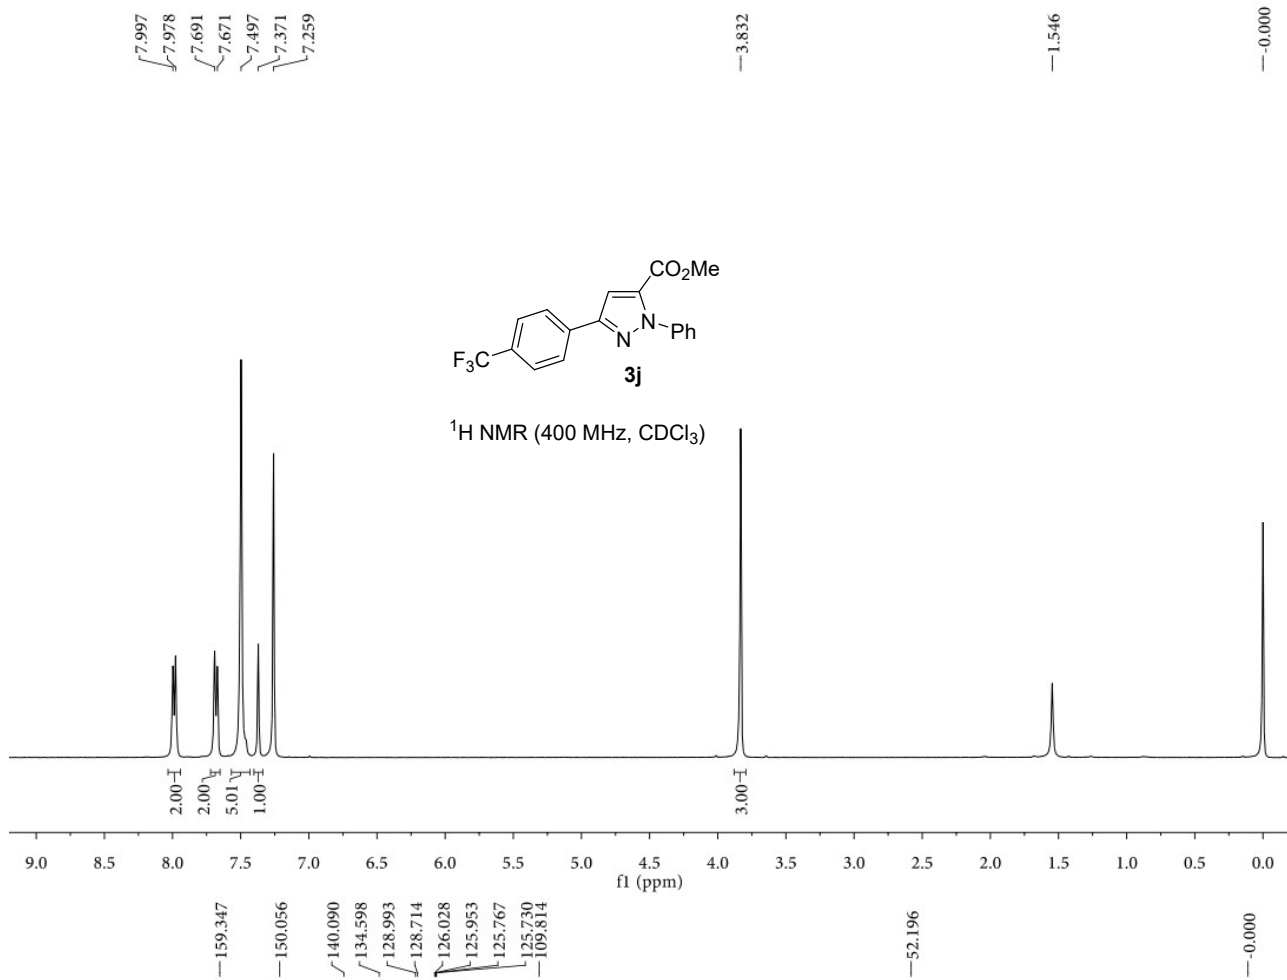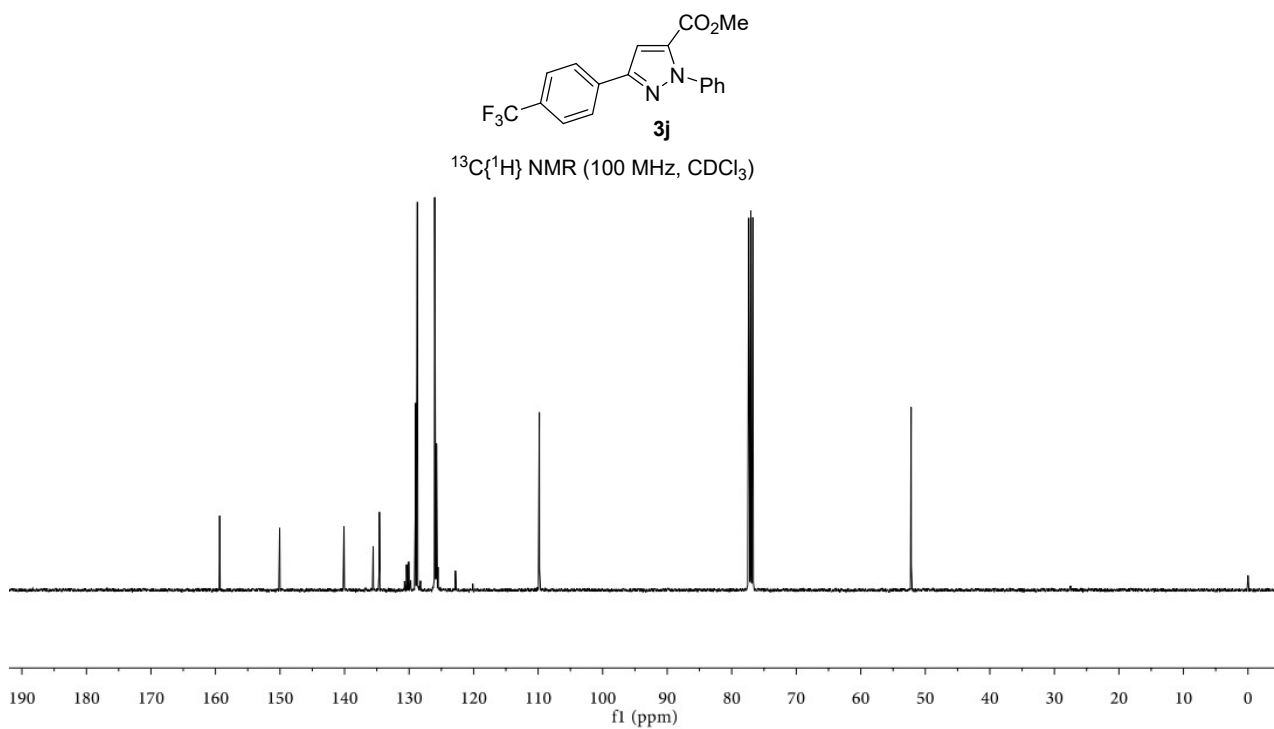

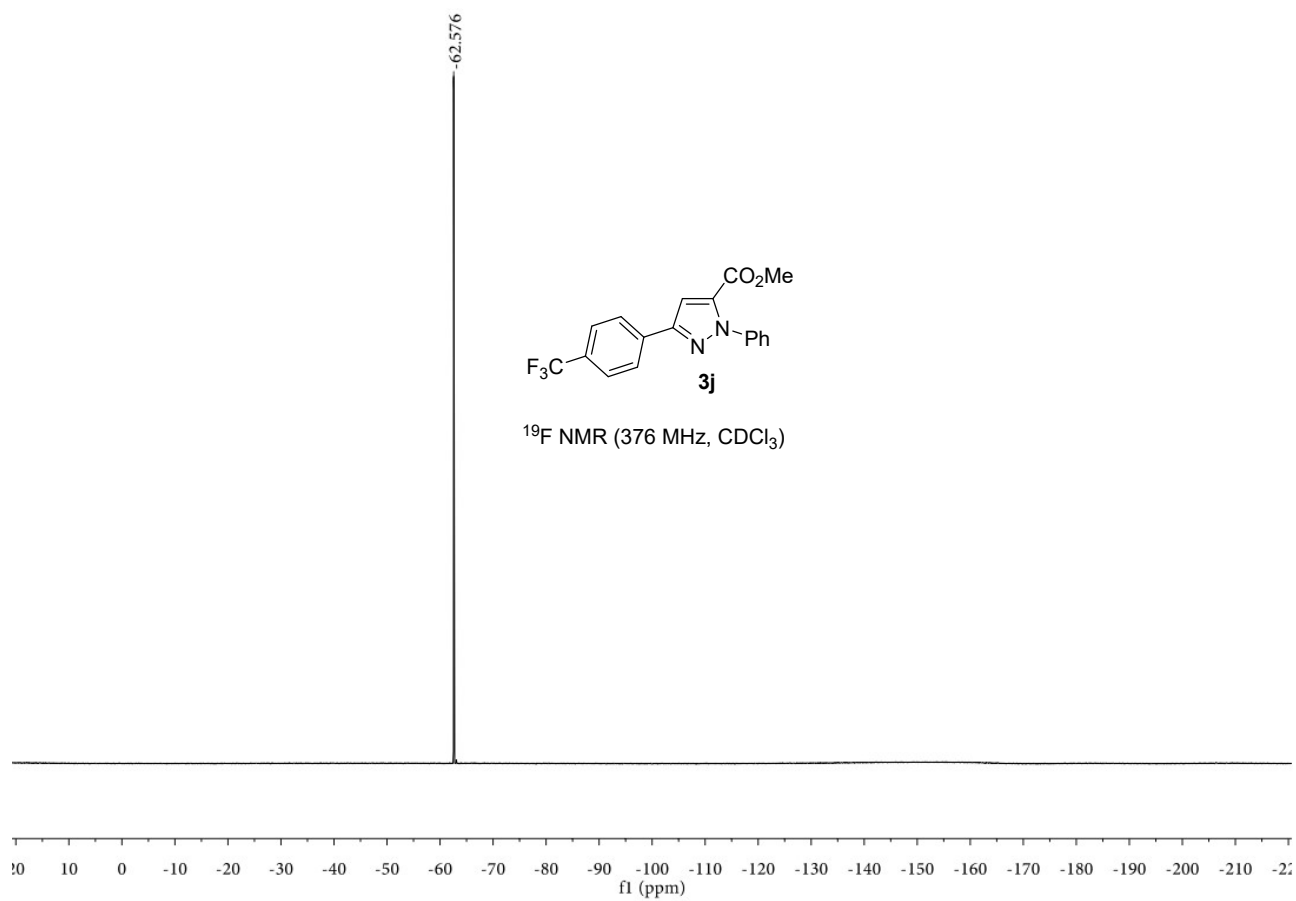

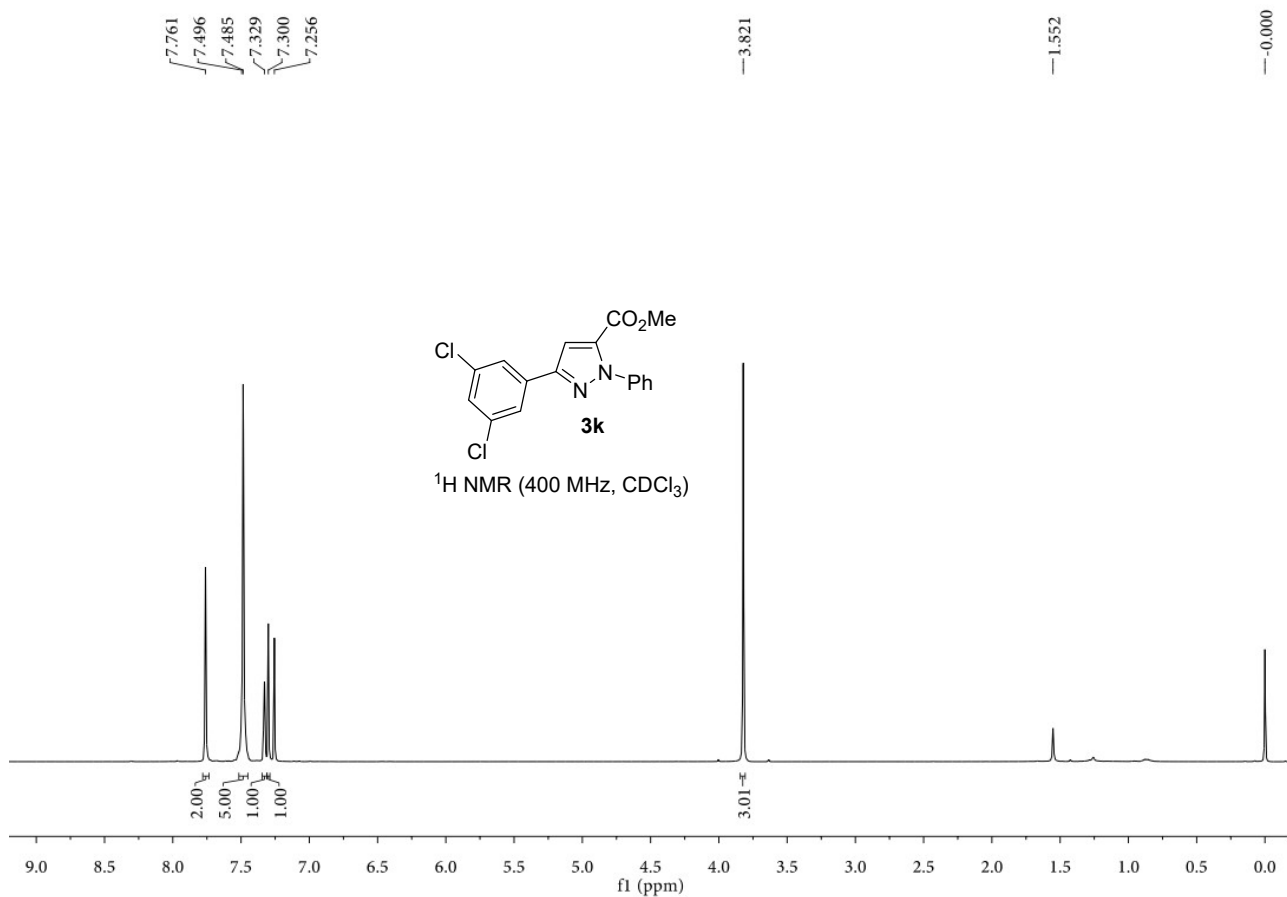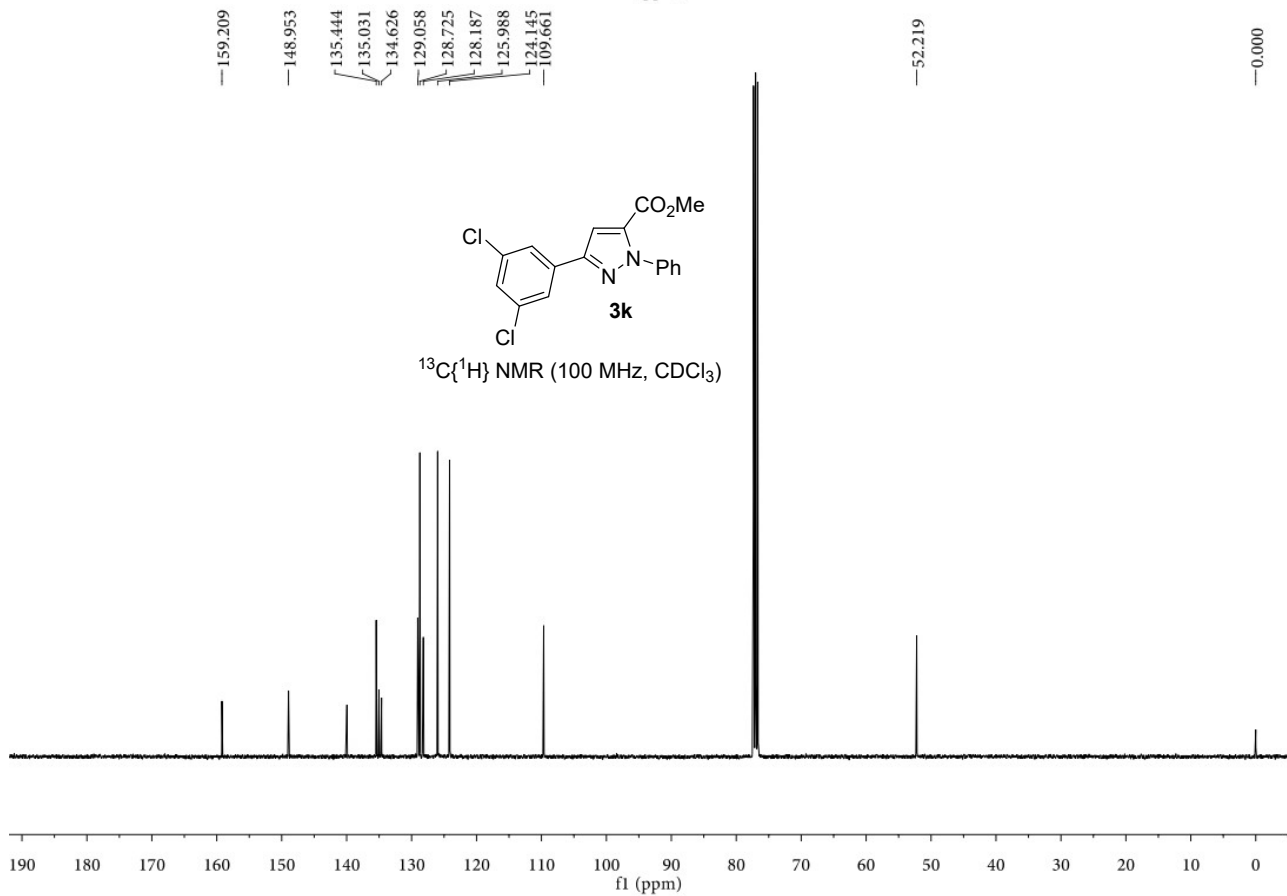



7.477  
7.475  
7.462  
7.252  
7.226  
6.781  
6.773  
6.485  
6.481  
6.478

3.800

0.000

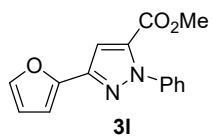

<sup>1</sup>H NMR (400 MHz, CDCl<sub>3</sub>)

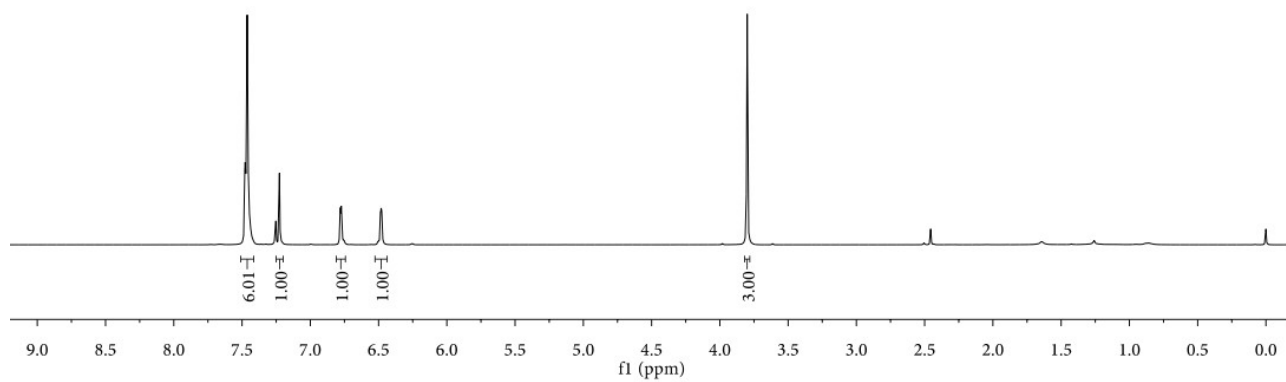

159.324

147.536

144.135

142.441

140.017

133.953

128.853

128.620

126.125

111.460

109.137

106.840

52.130

0.000

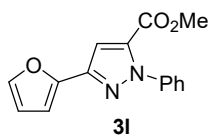

<sup>13</sup>C{<sup>1</sup>H} NMR (100 MHz, CDCl<sub>3</sub>)

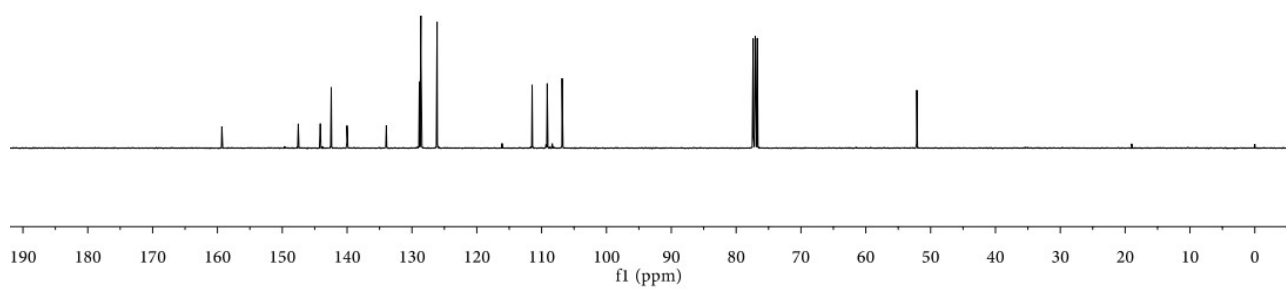

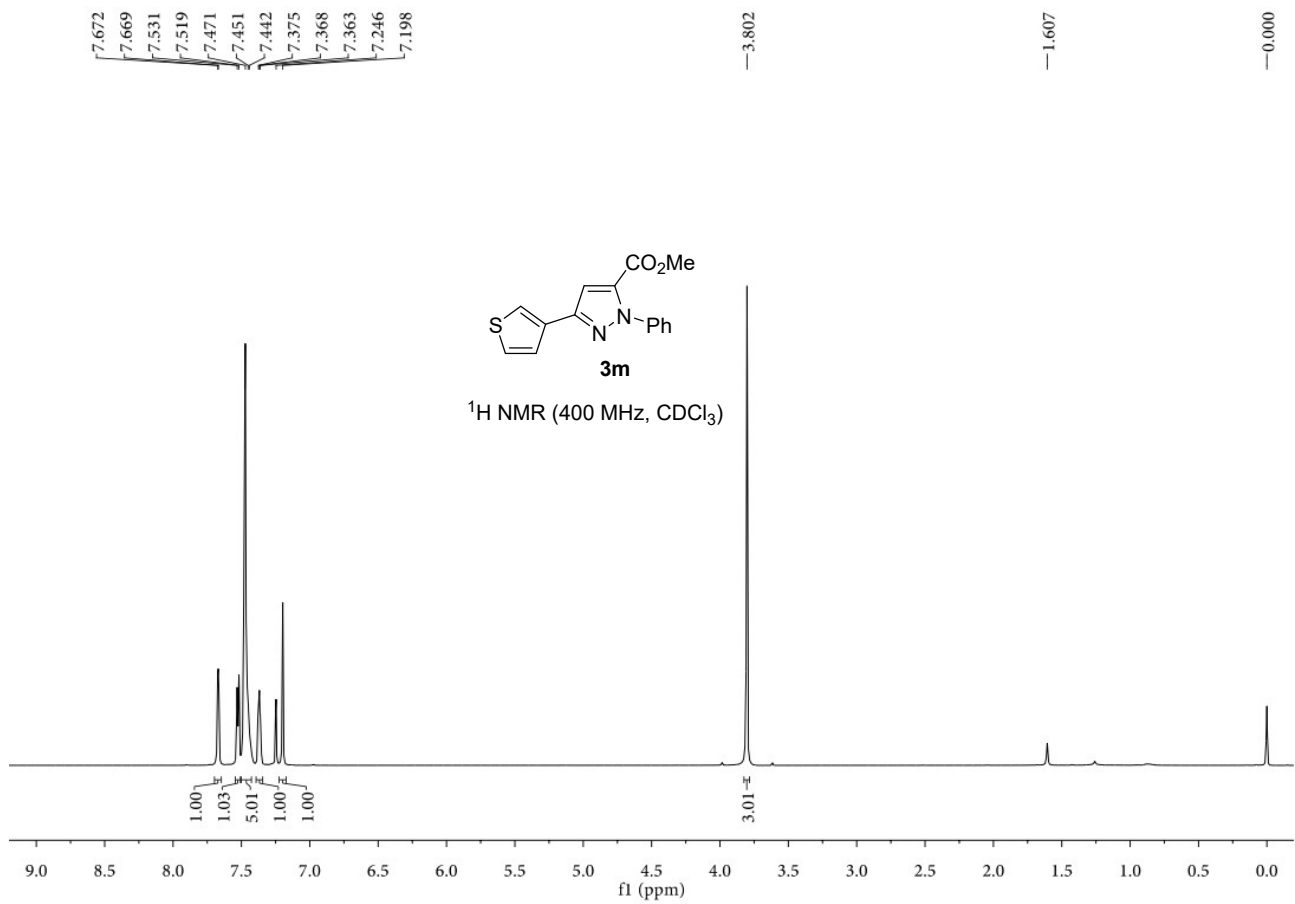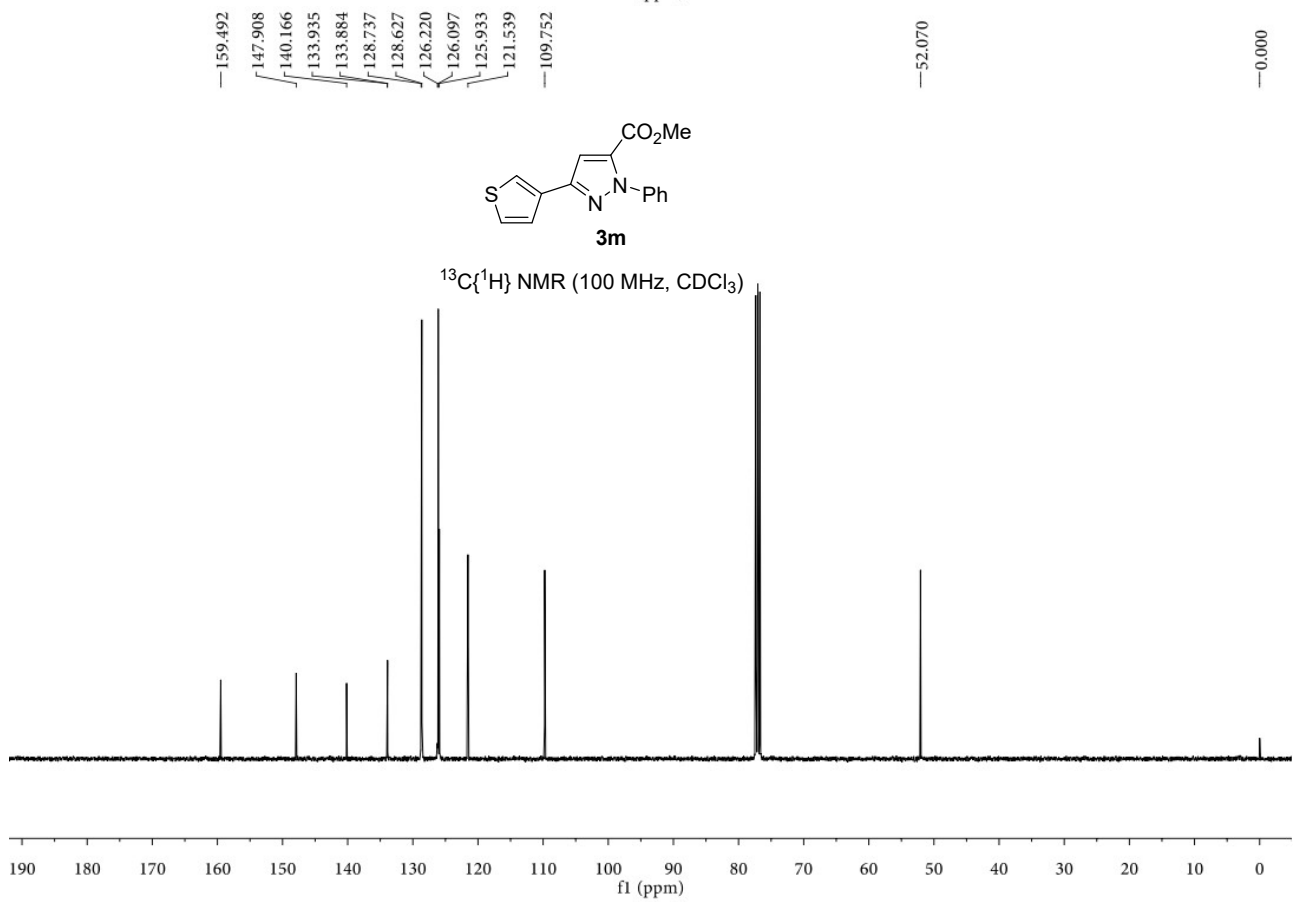

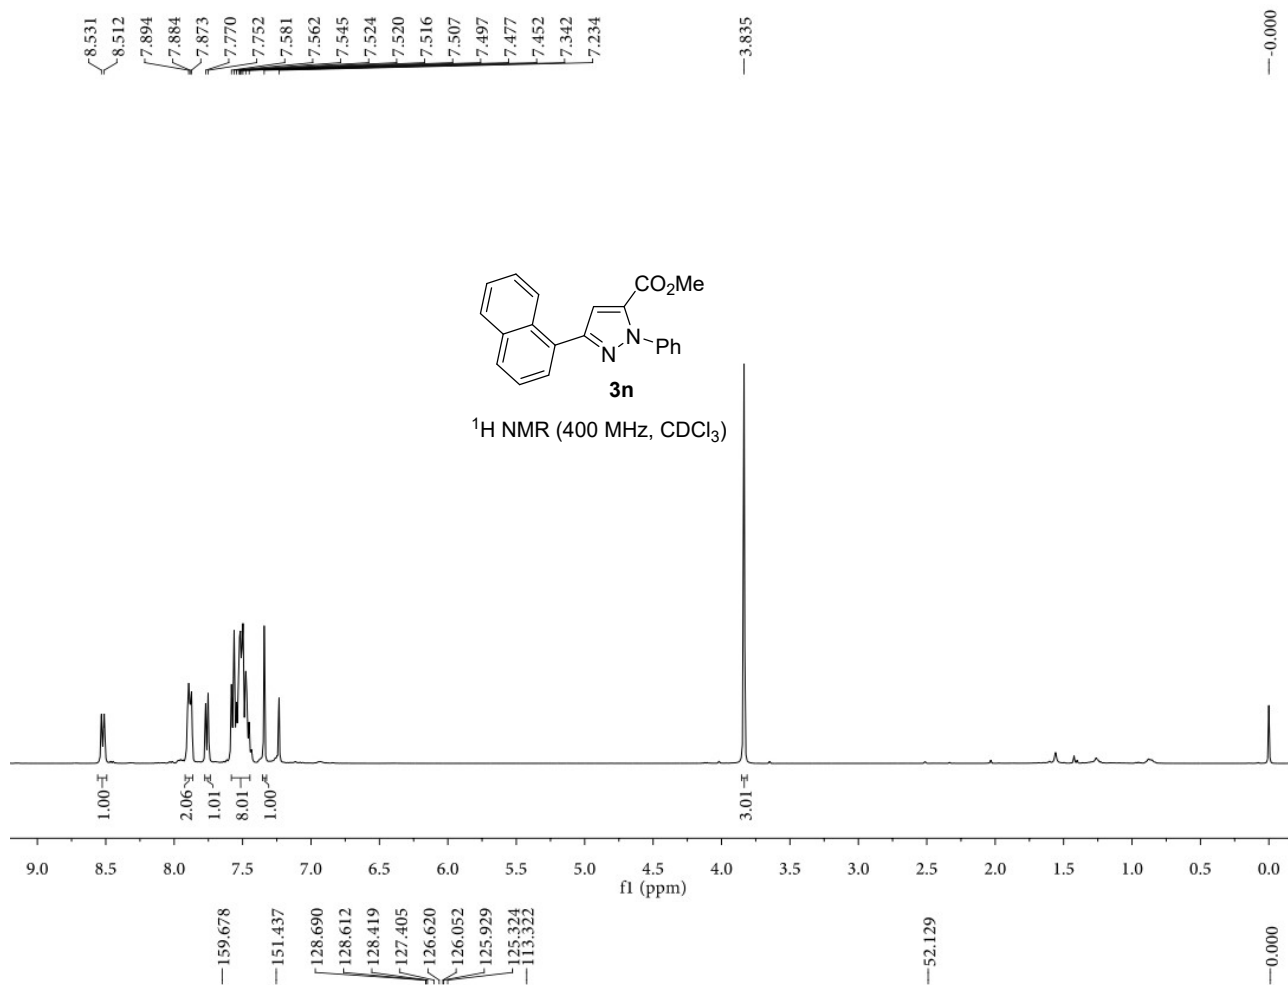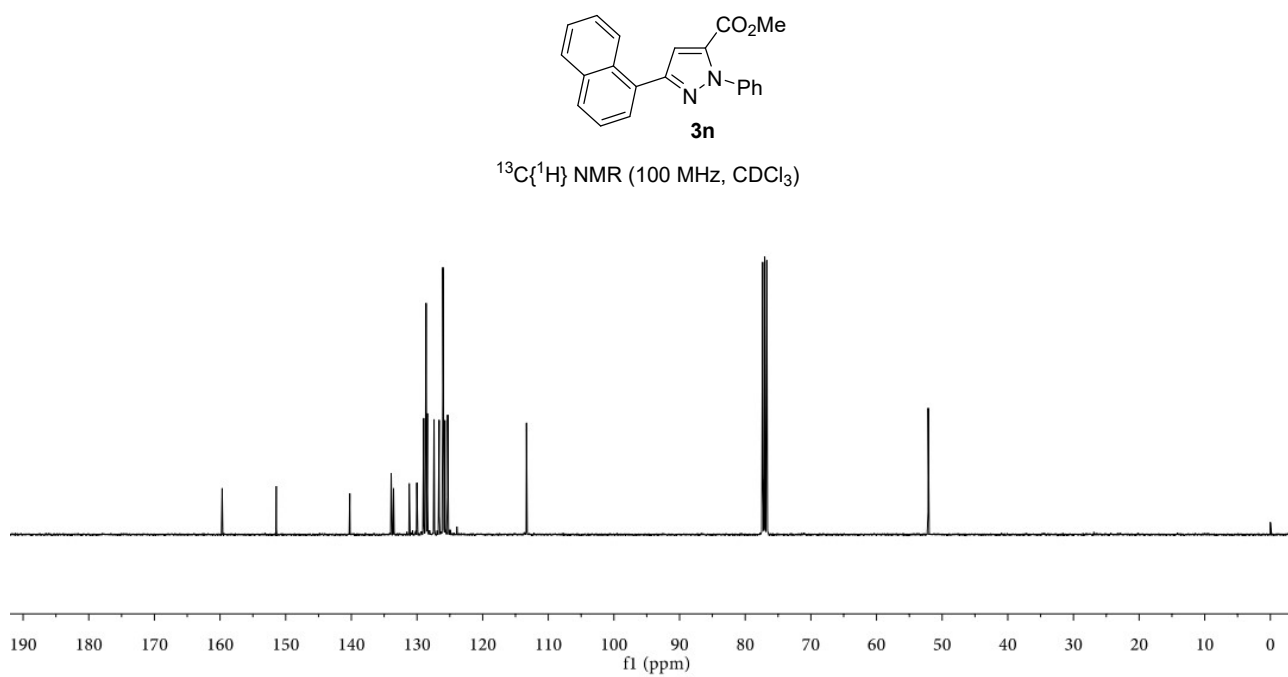

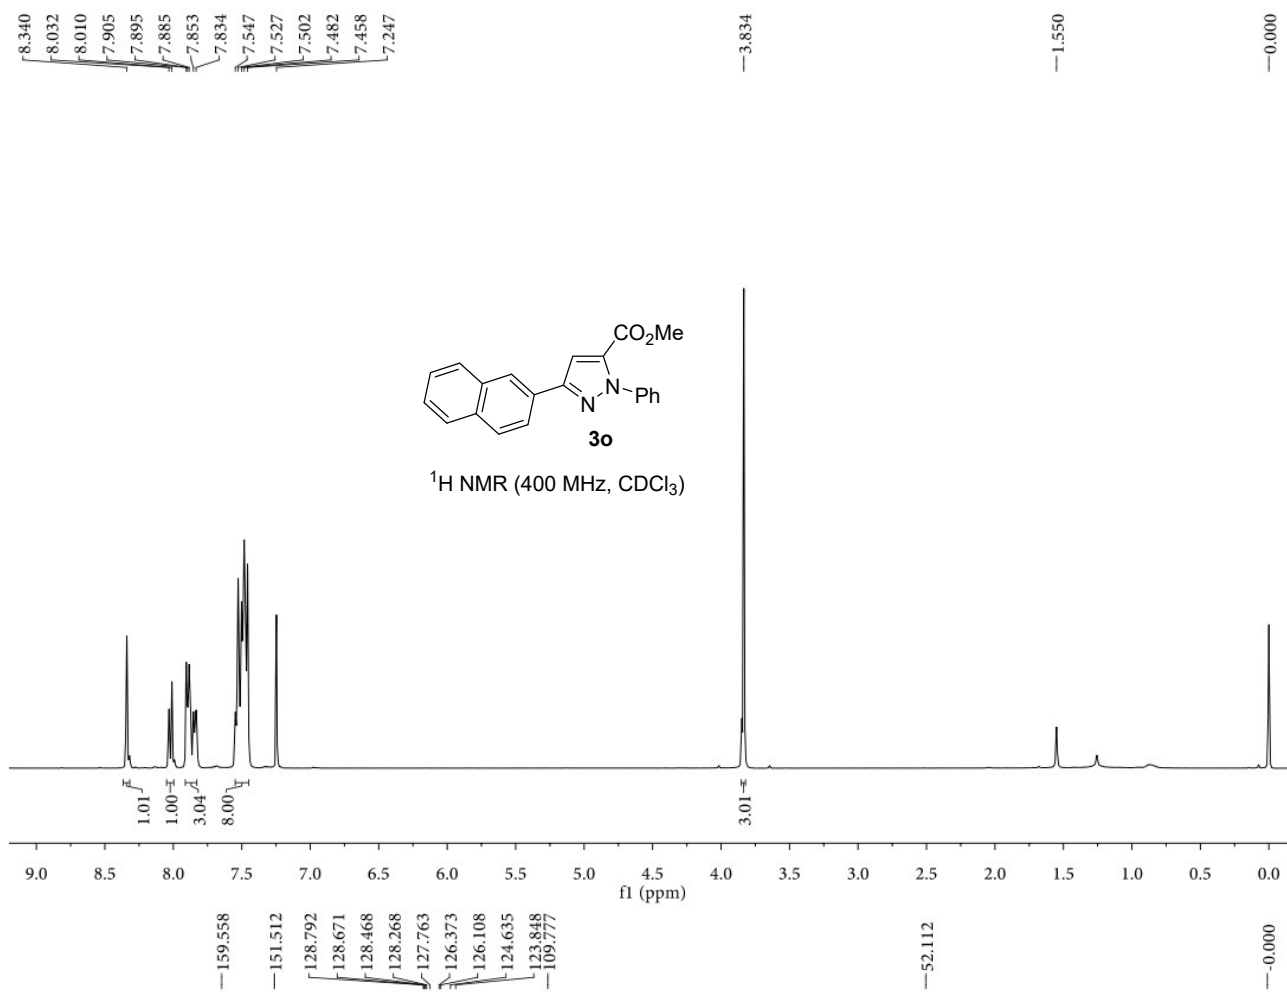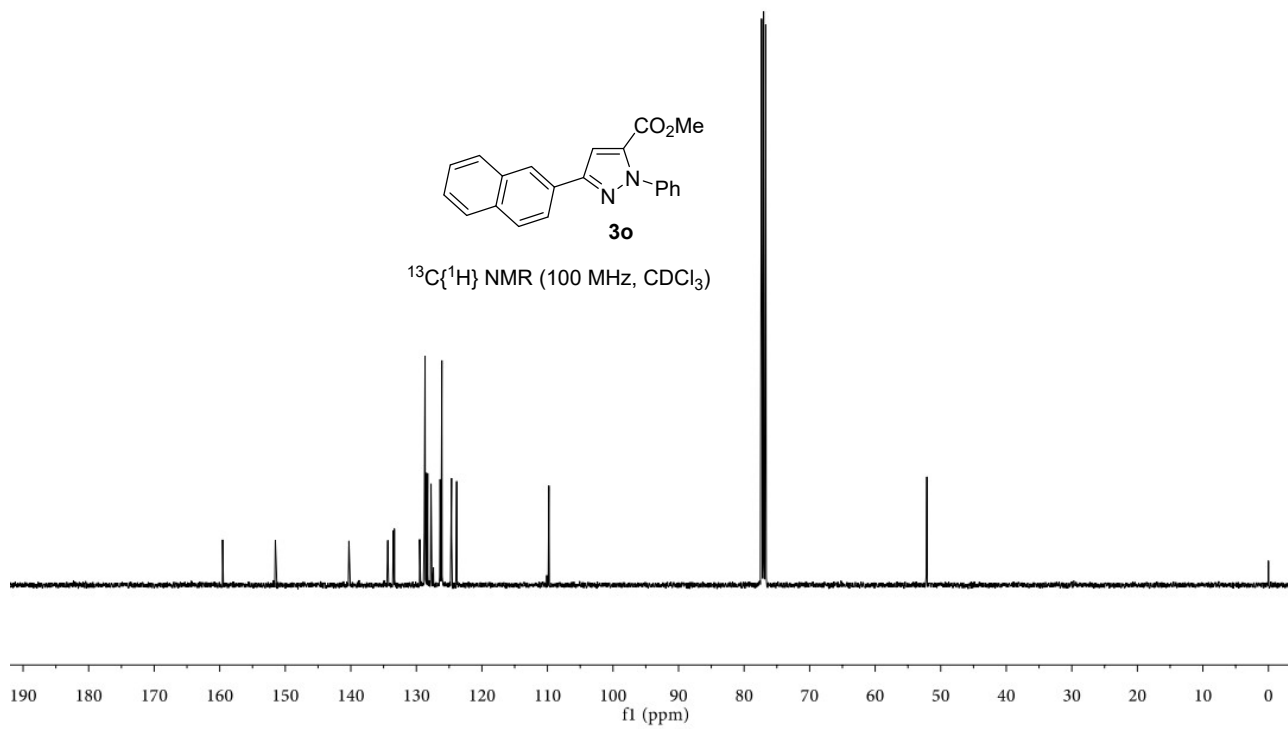

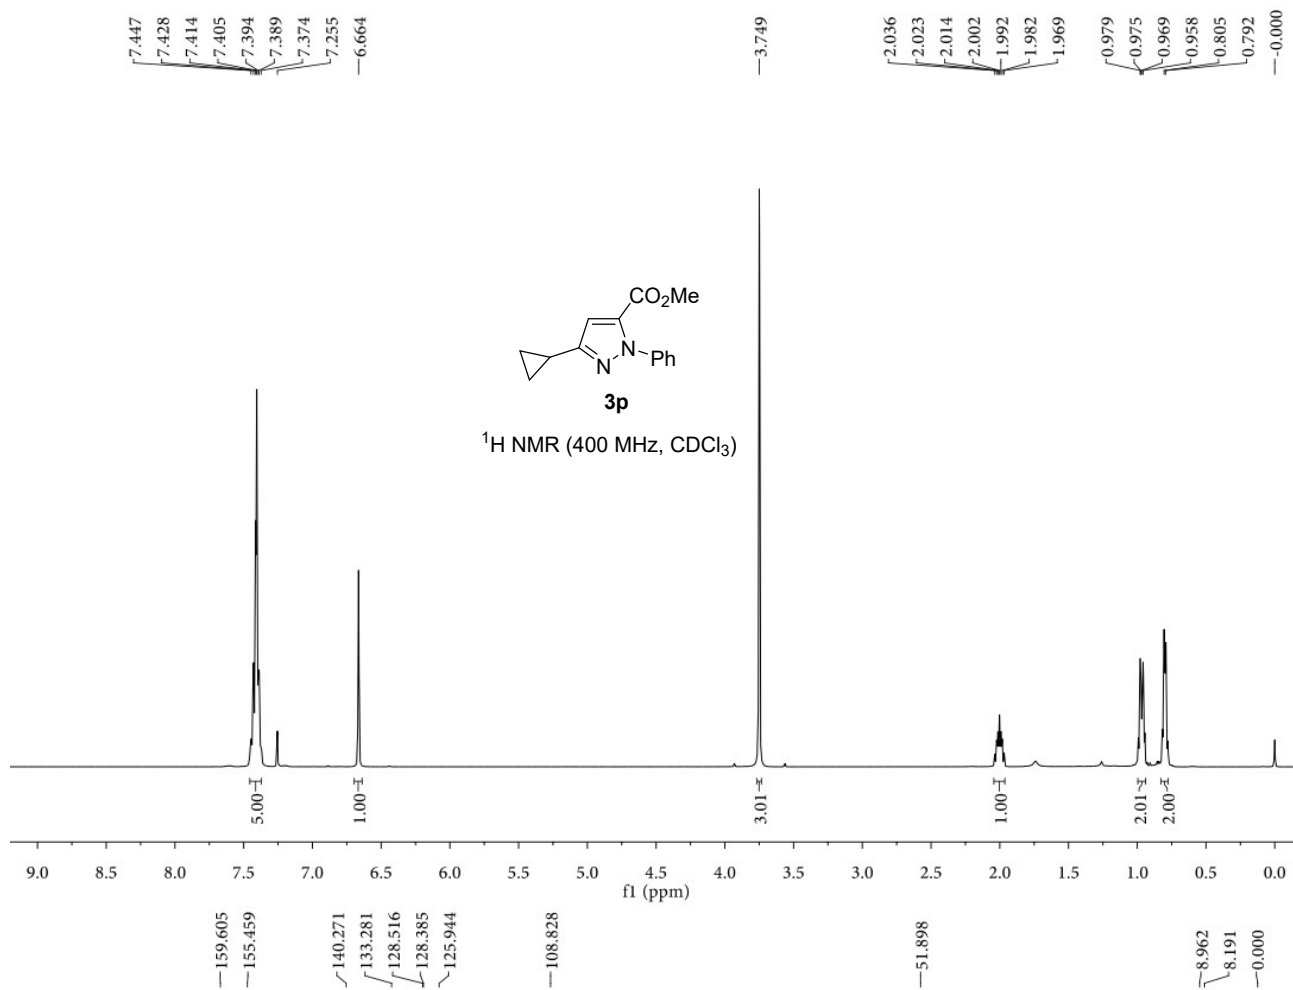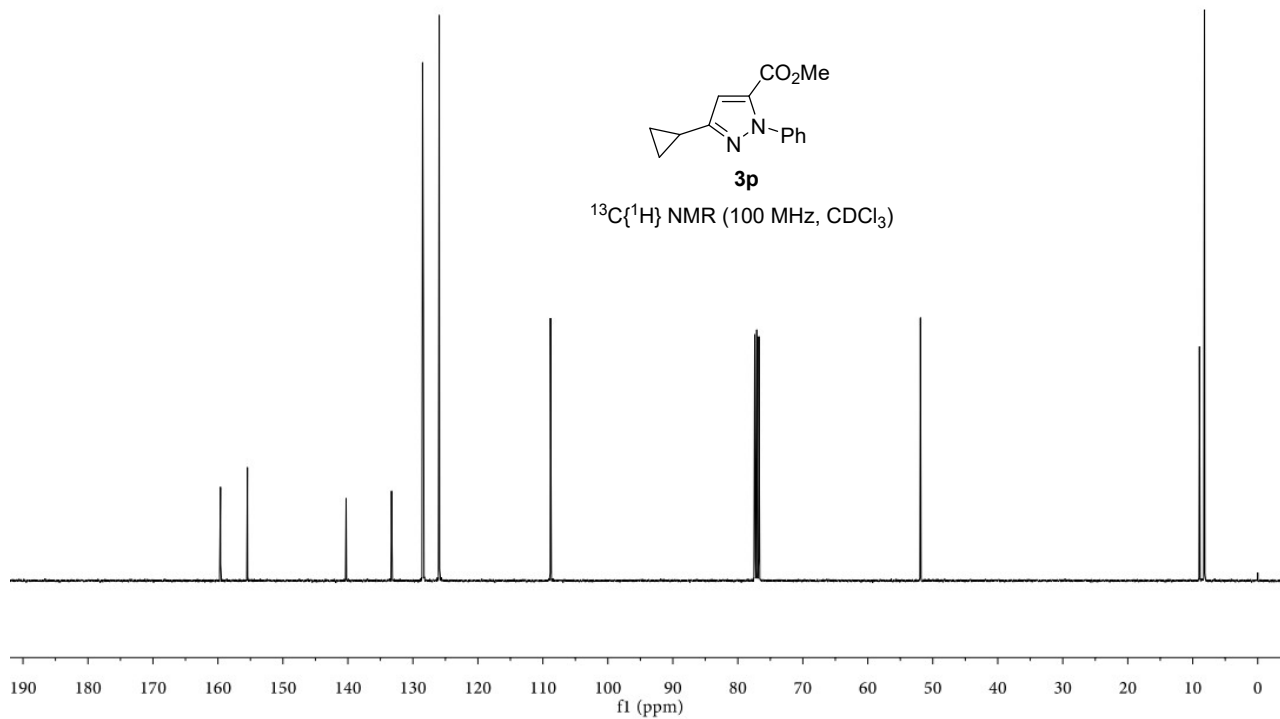

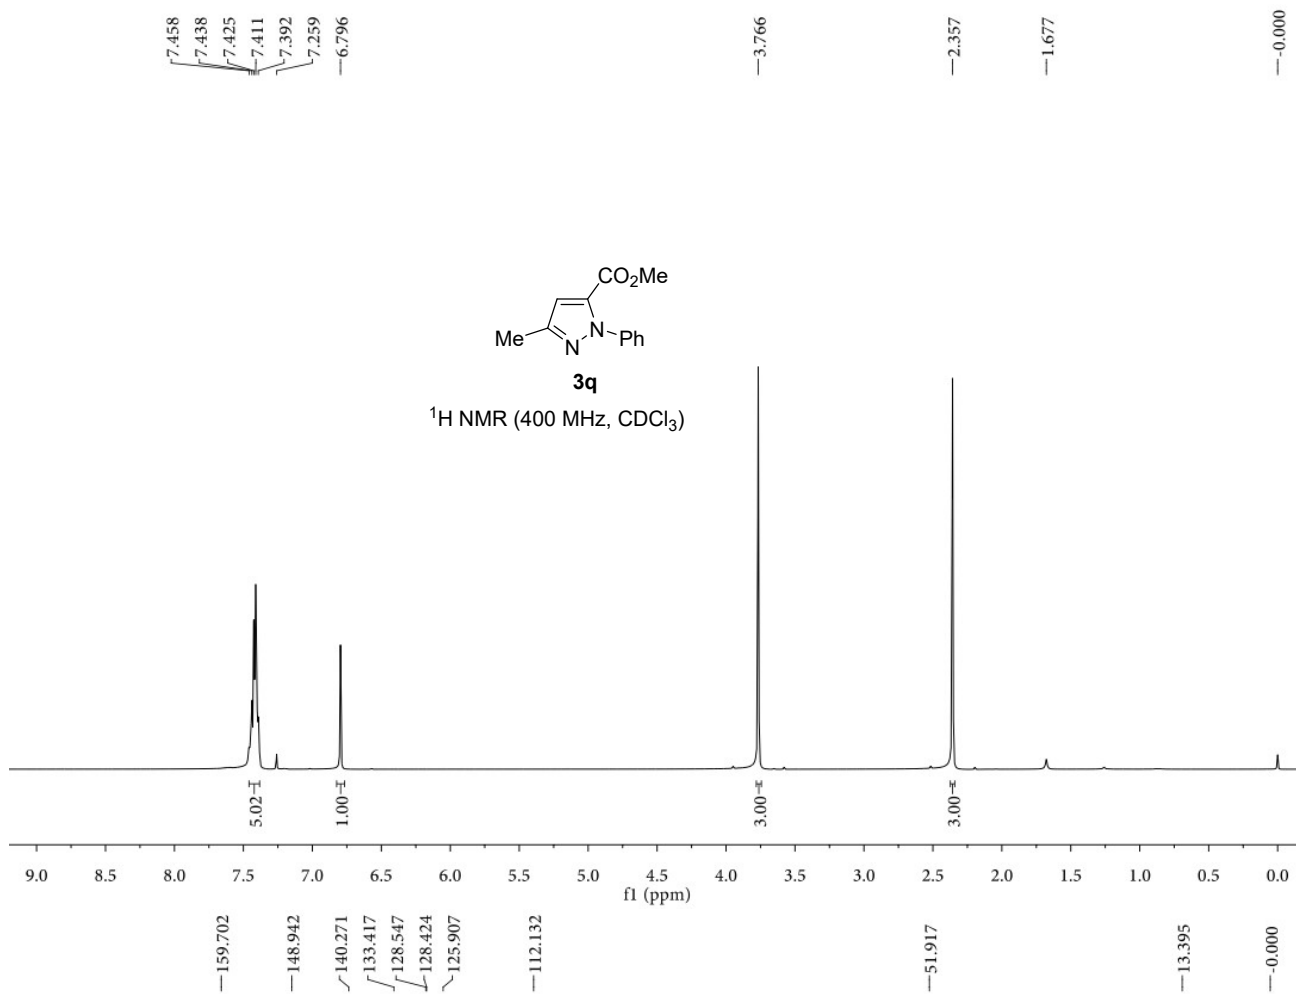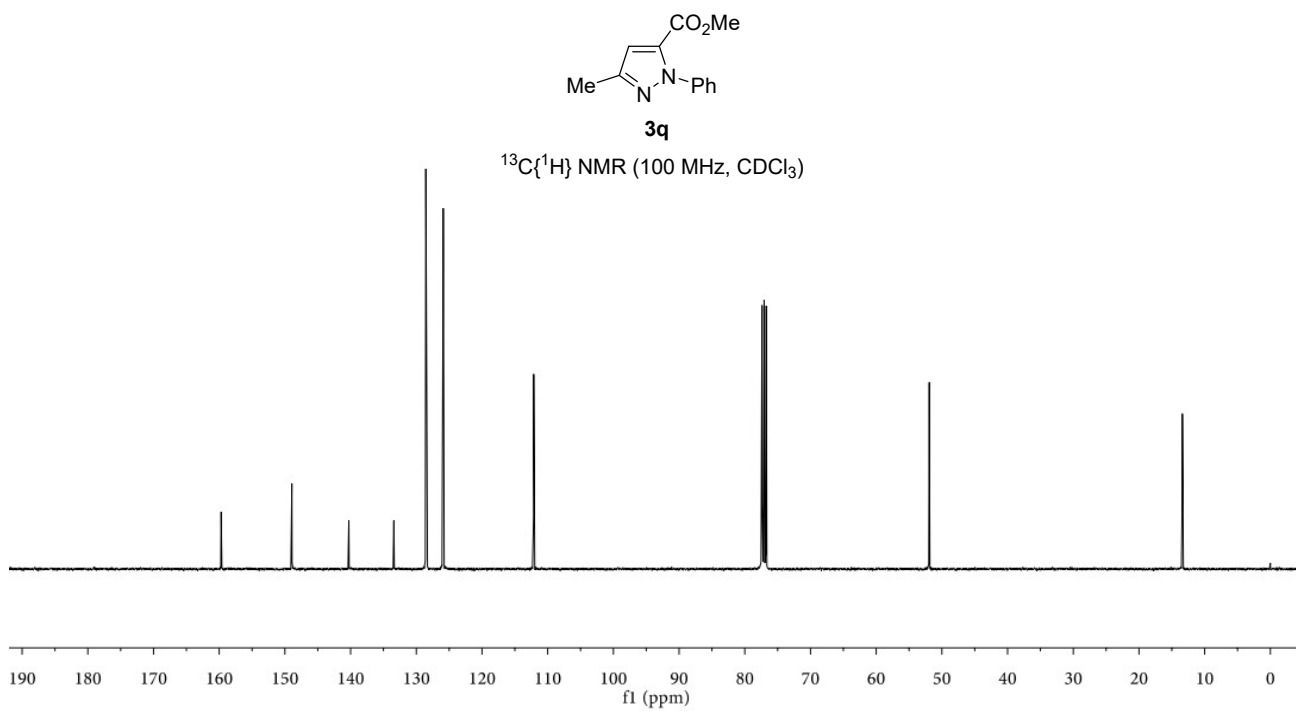

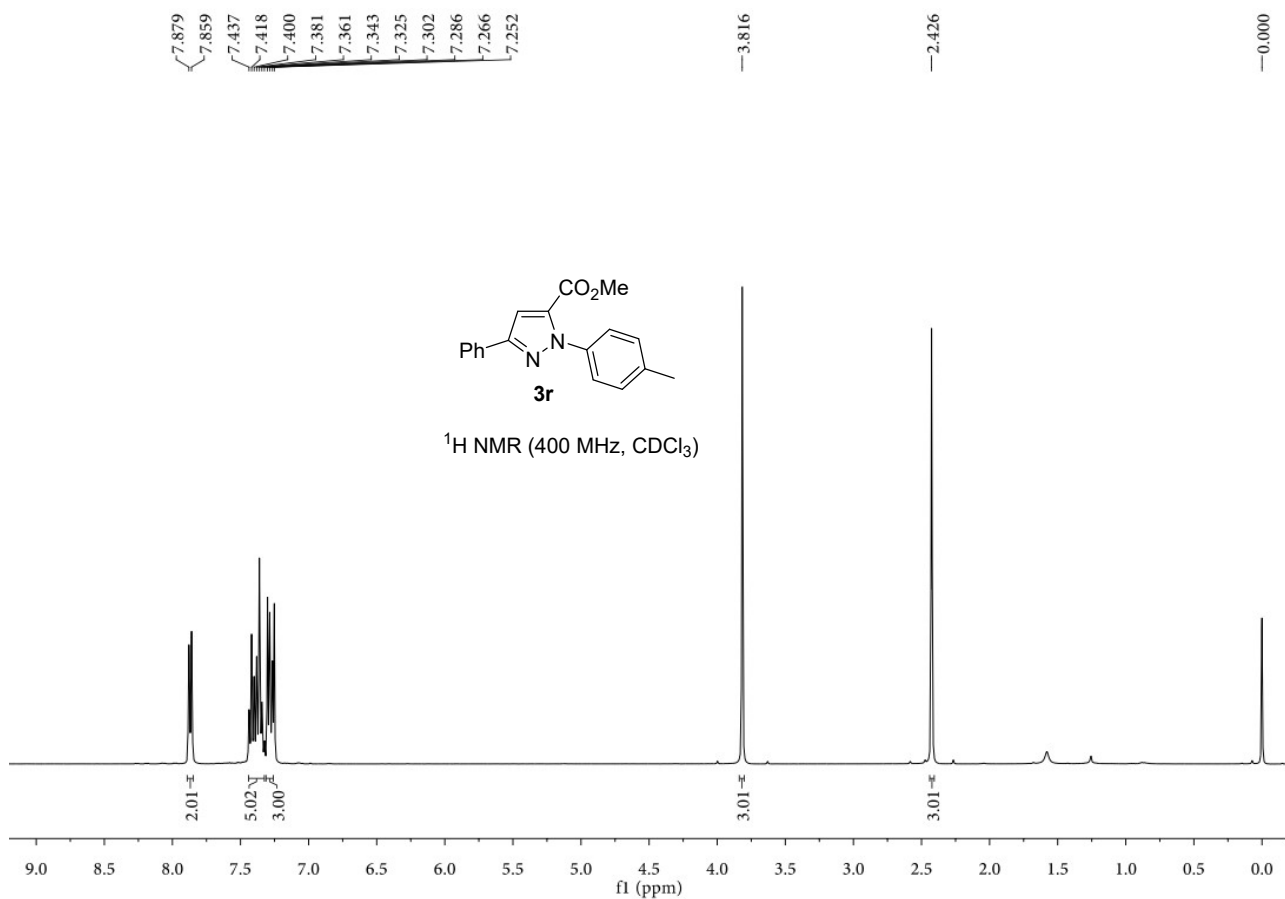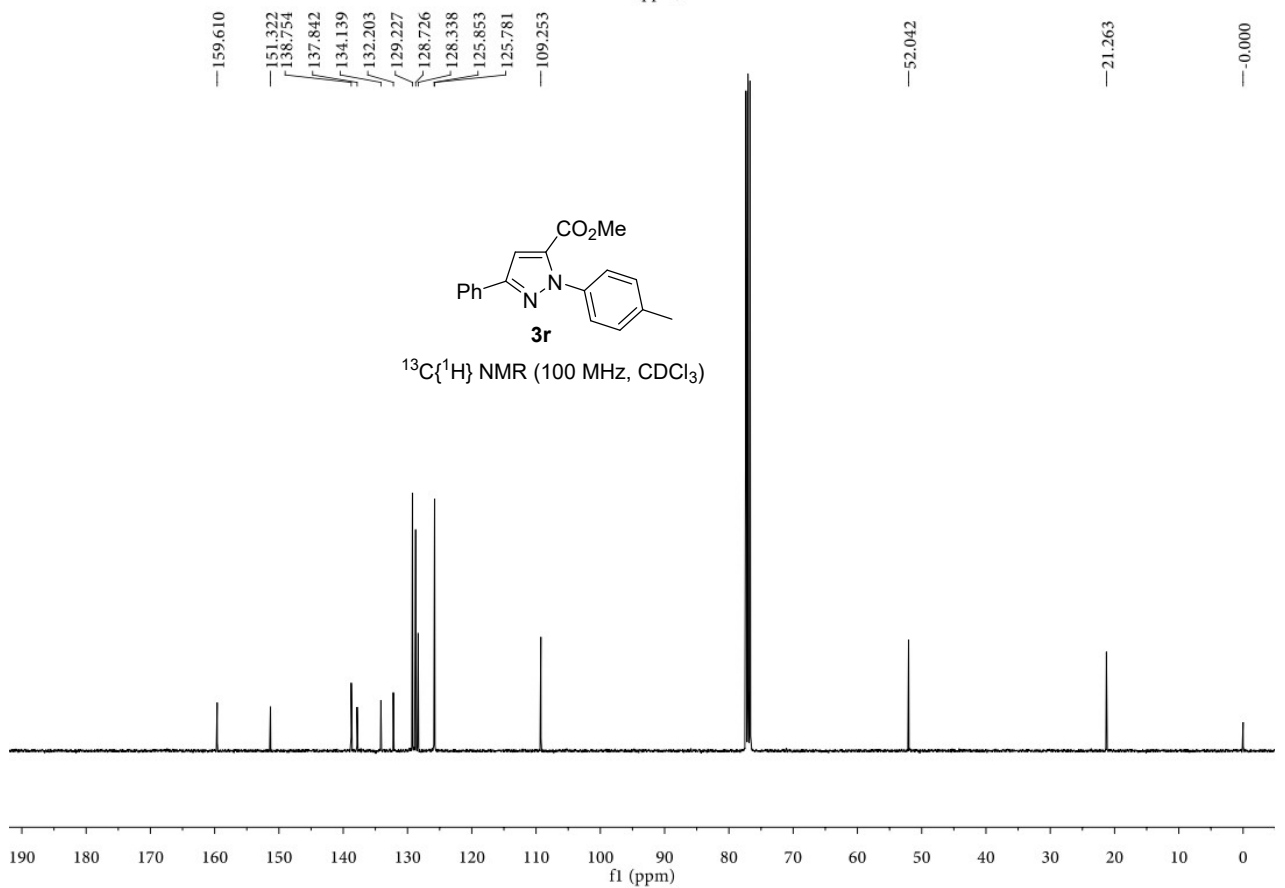

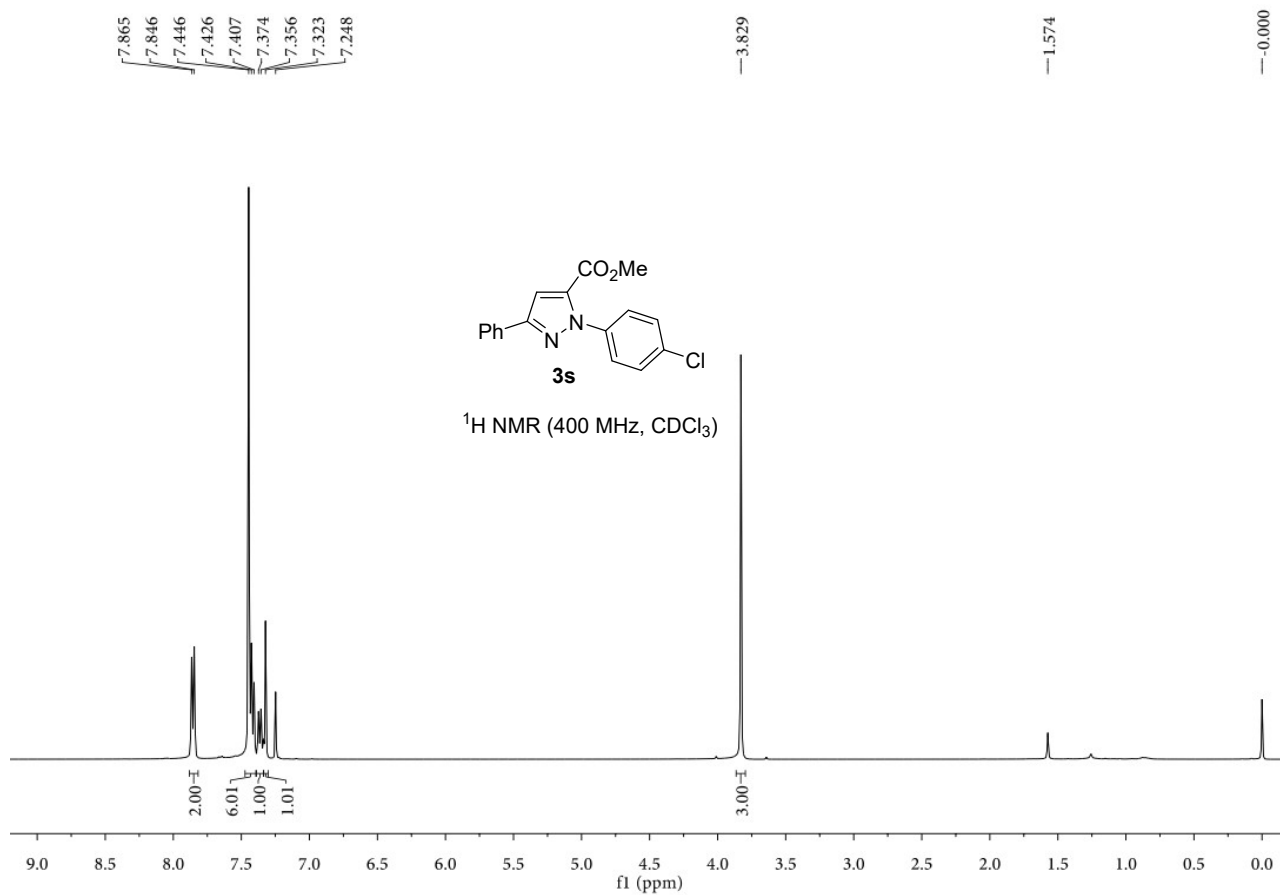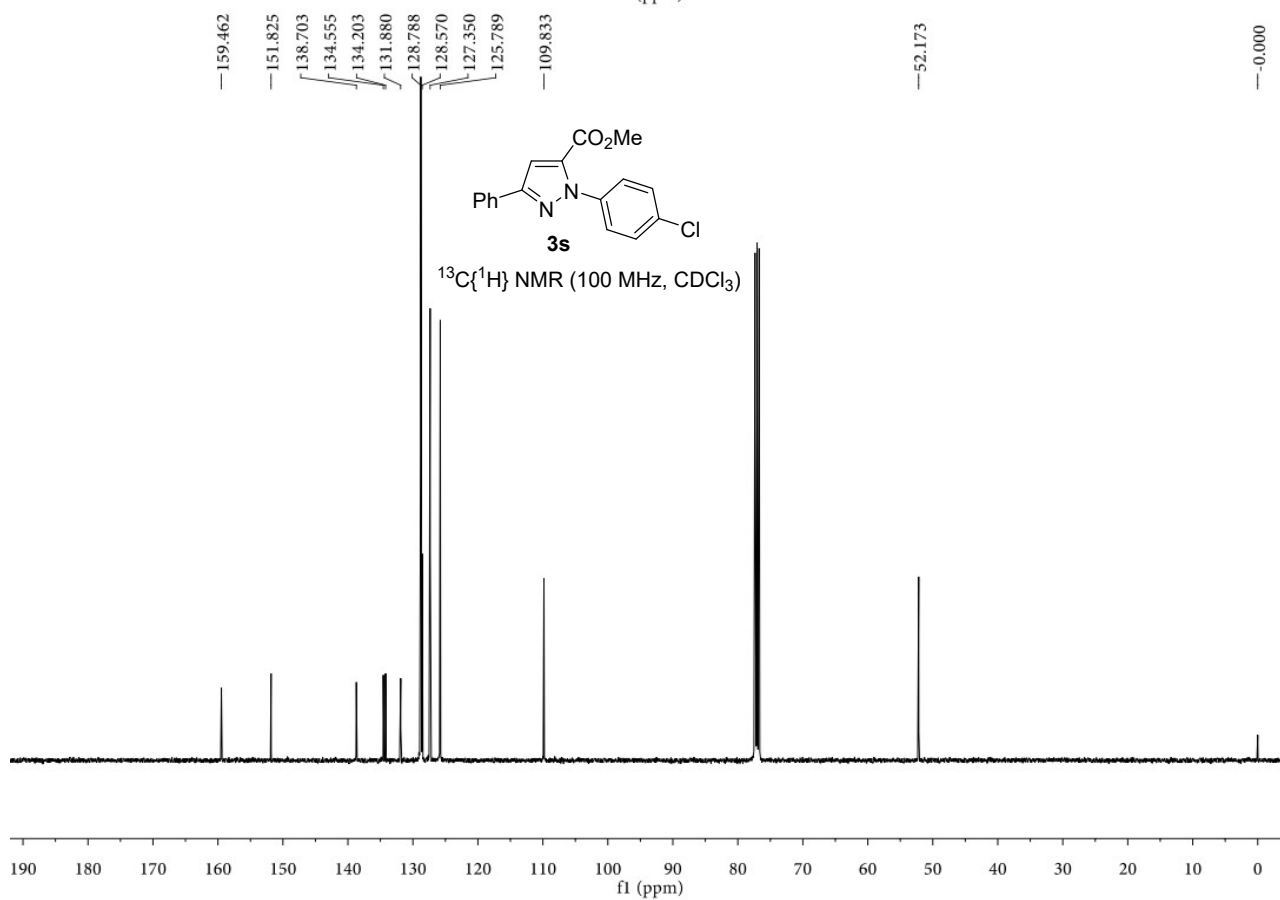



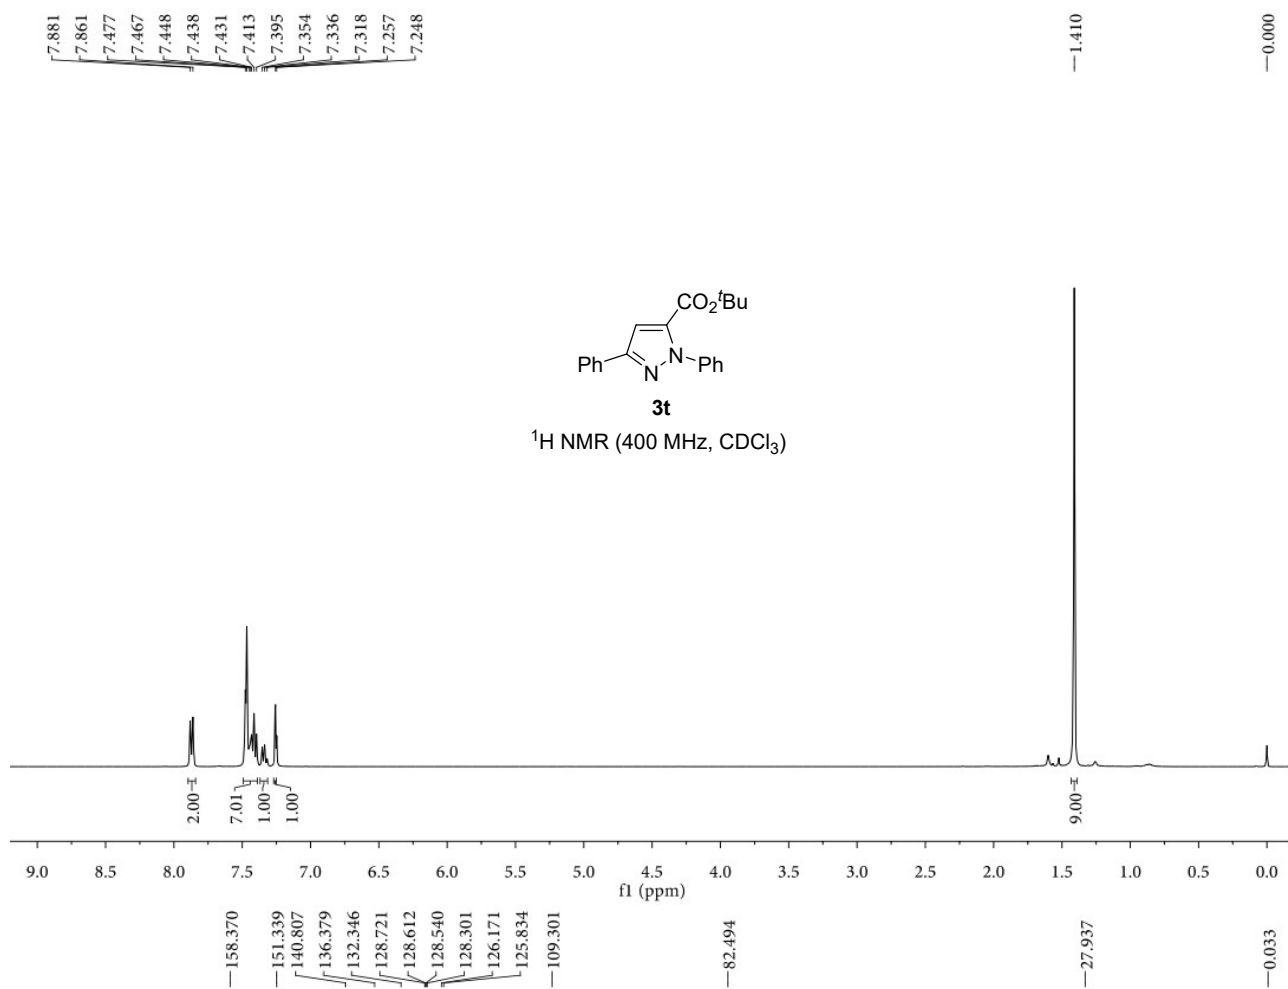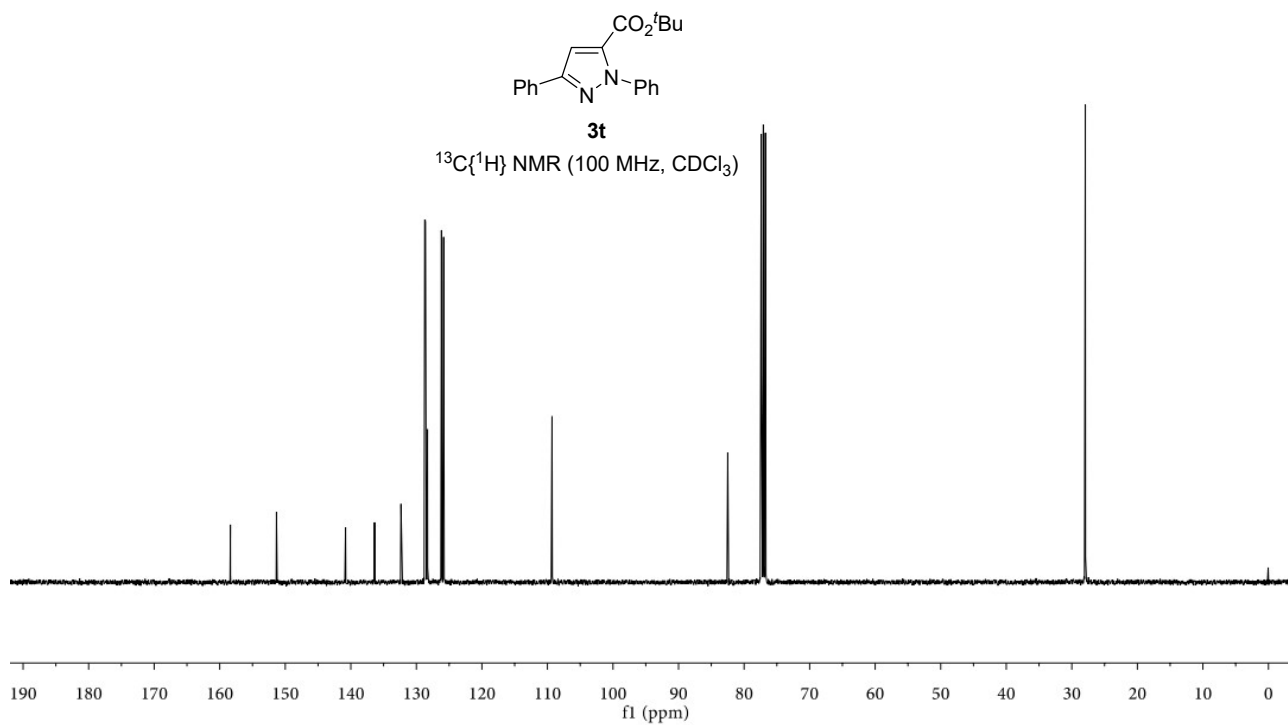

7.885  
7.866  
7.812  
7.792  
7.580  
7.561  
7.543  
7.496  
7.480  
7.465  
7.448  
7.424  
7.407  
7.303  
7.260

-1.566

-0.012

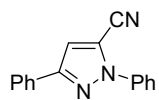

**3u**

$^1\text{H}$  NMR (400 MHz,  $\text{CDCl}_3$ )

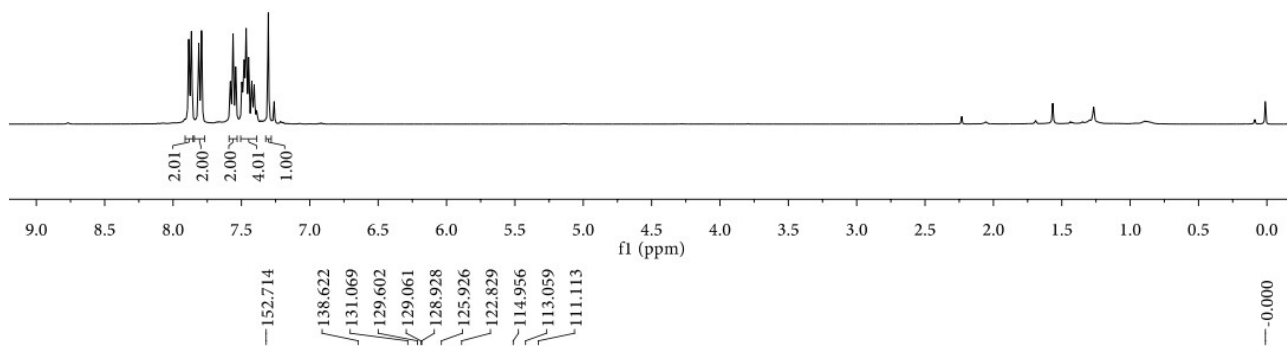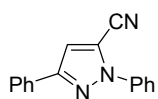

**3u**

$^{13}\text{C}\{^1\text{H}\}$  NMR (100 MHz,  $\text{CDCl}_3$ )

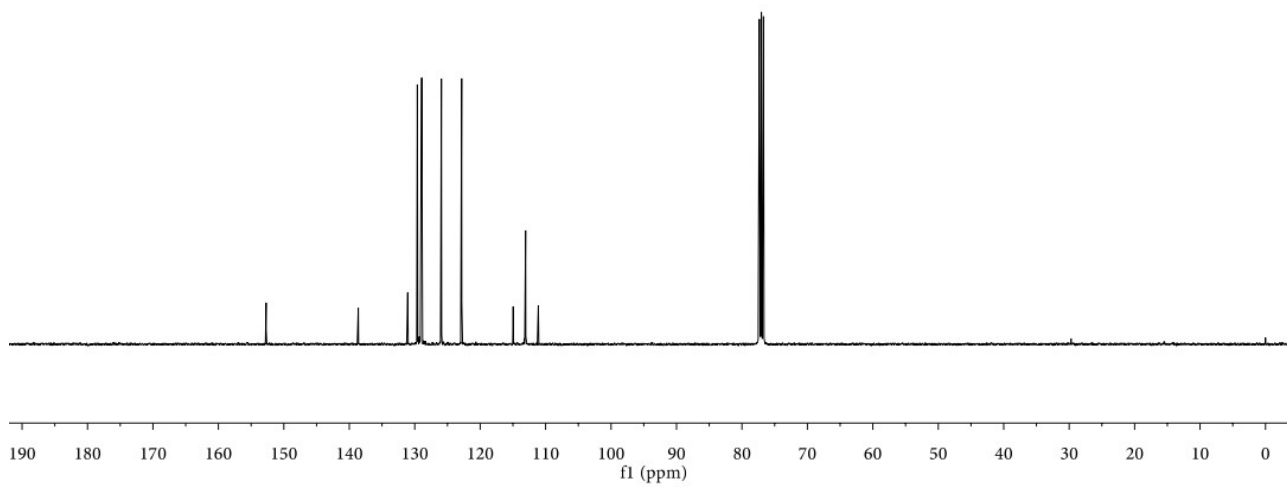

7.903  
7.884  
7.501  
7.482  
7.468  
7.459  
7.444  
7.426  
7.388  
7.370  
7.351  
7.274  
7.260

2.959  
2.941  
2.923  
2.905

1.201  
1.183  
1.165

-0.019

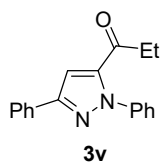

<sup>1</sup>H NMR (400 MHz, CDCl<sub>3</sub>)

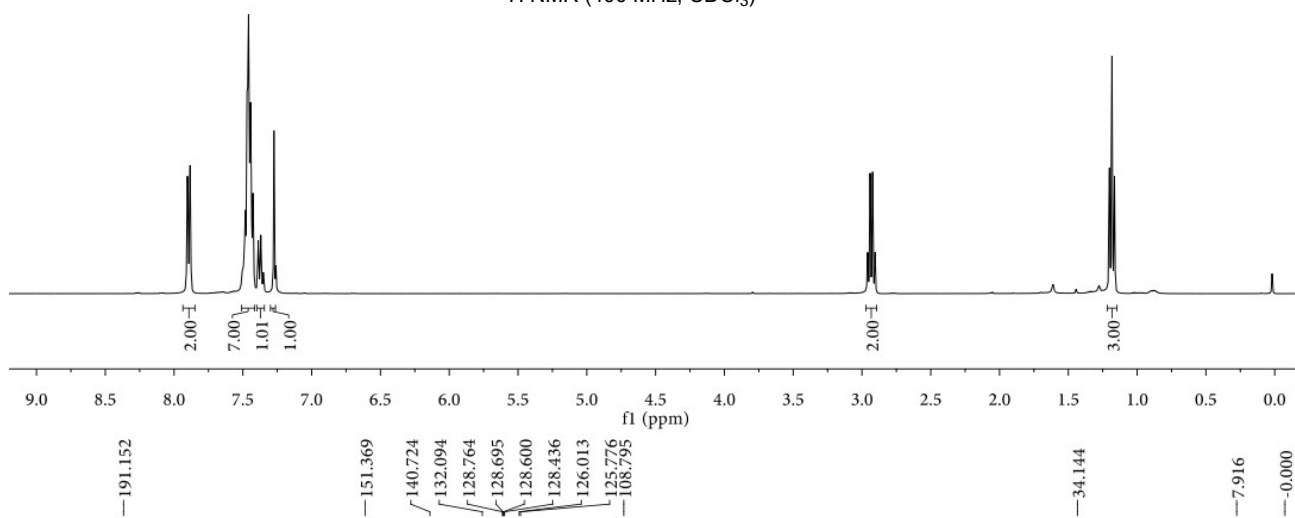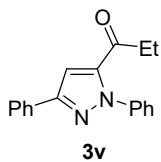

<sup>13</sup>C{<sup>1</sup>H} NMR (100 MHz, CDCl<sub>3</sub>)

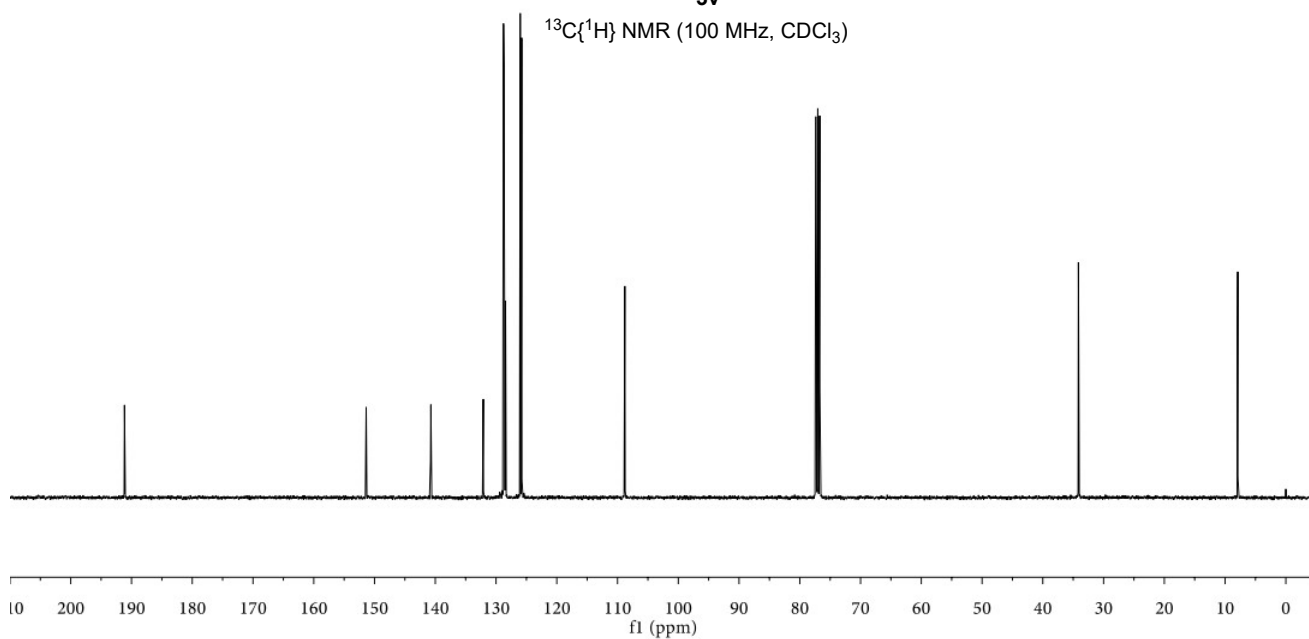

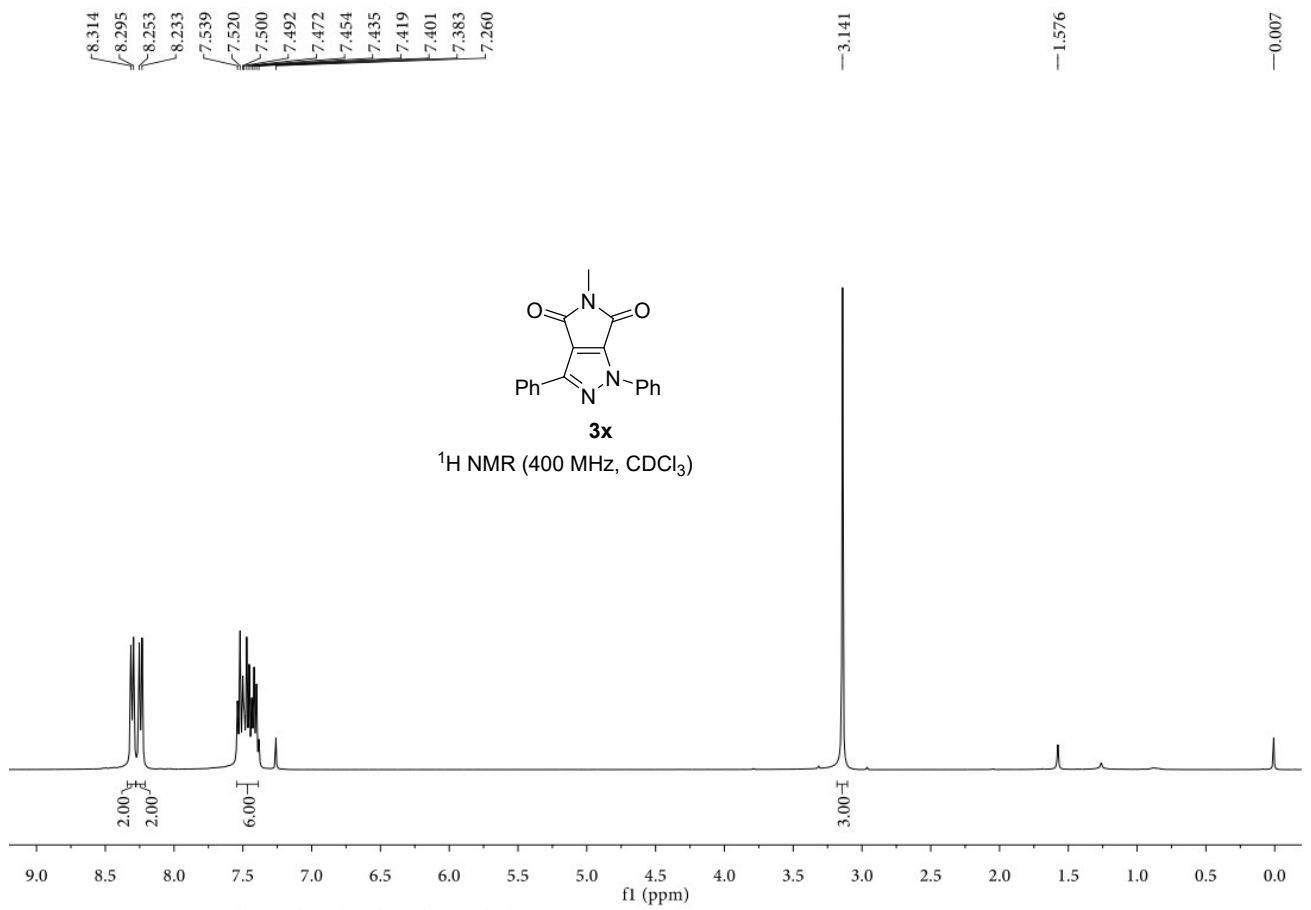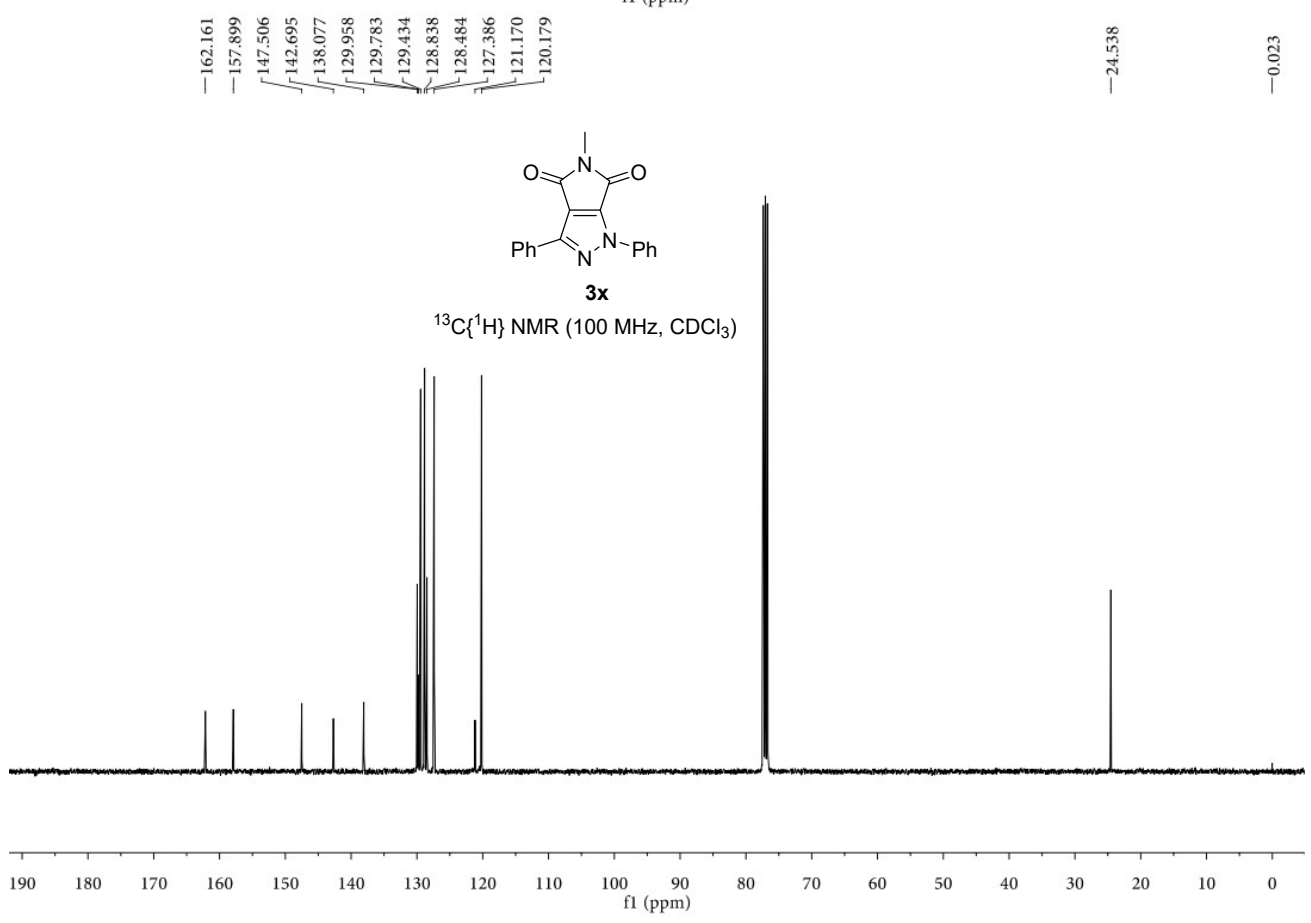

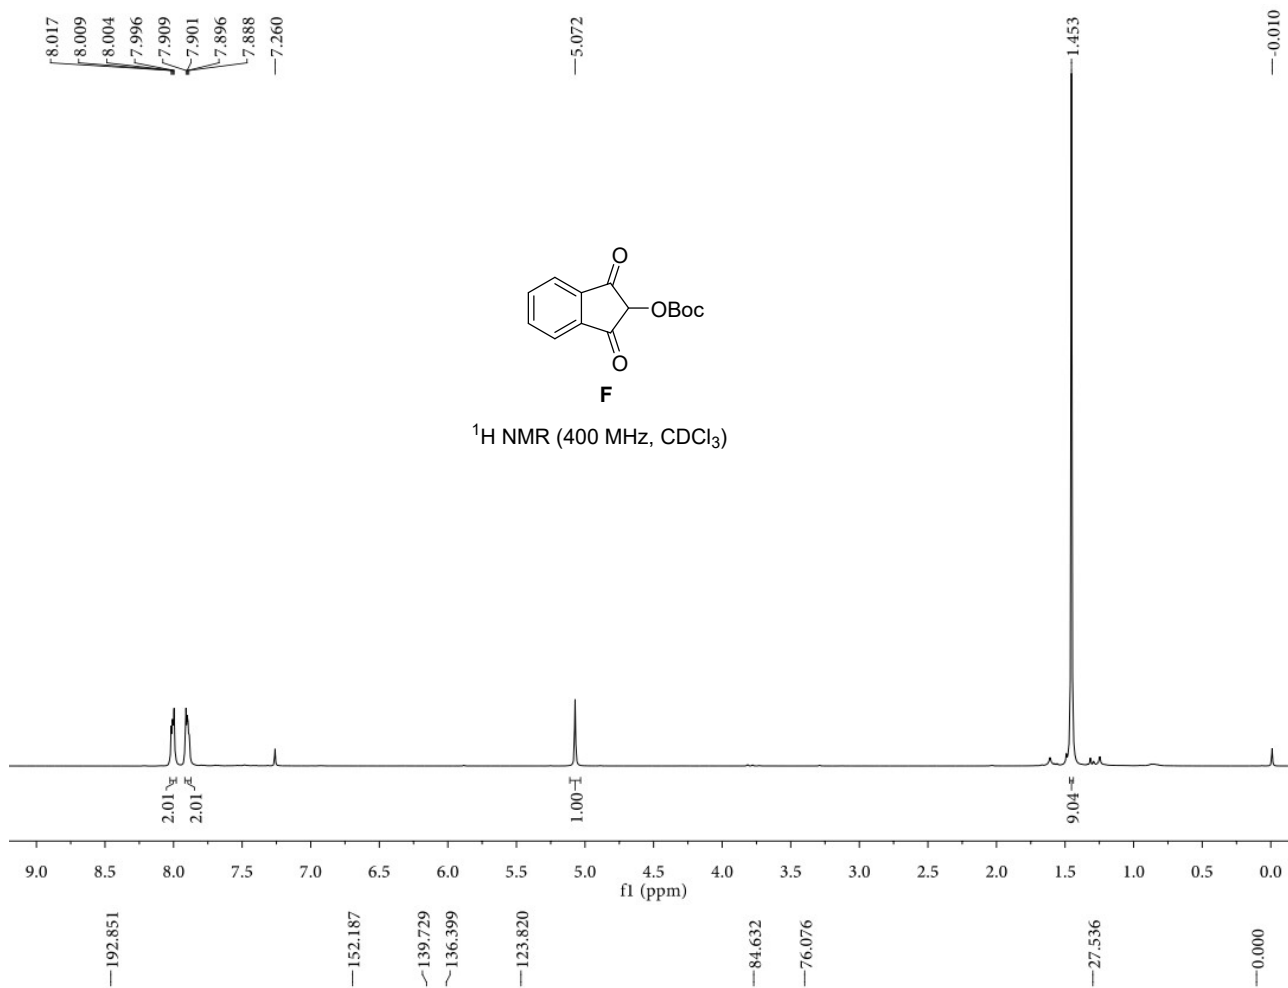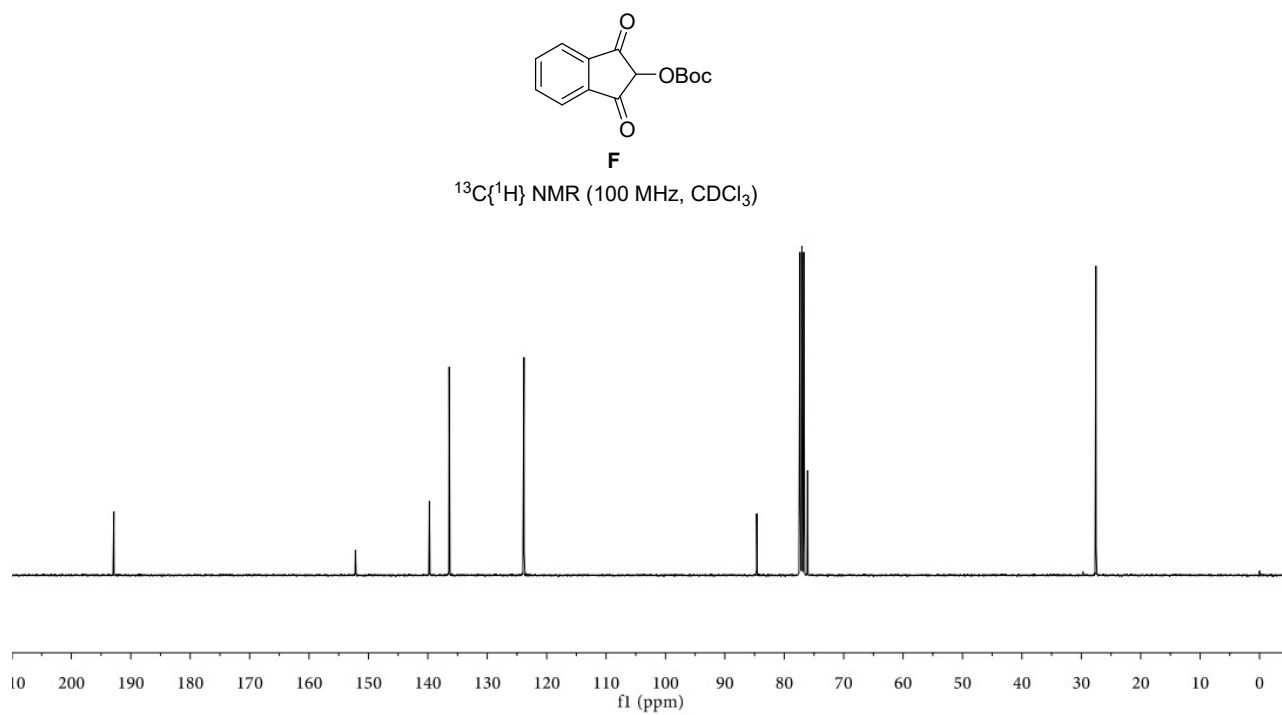

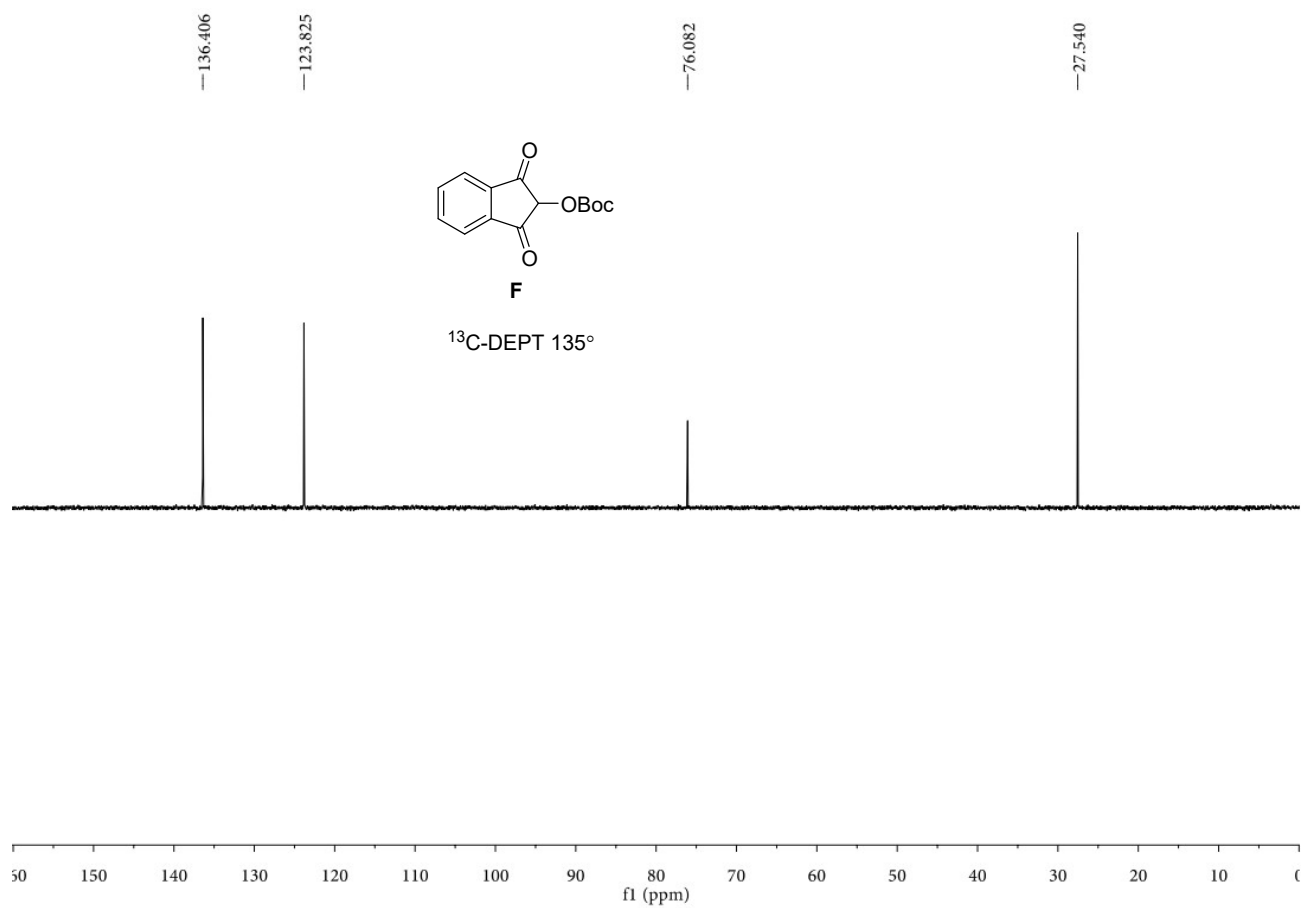

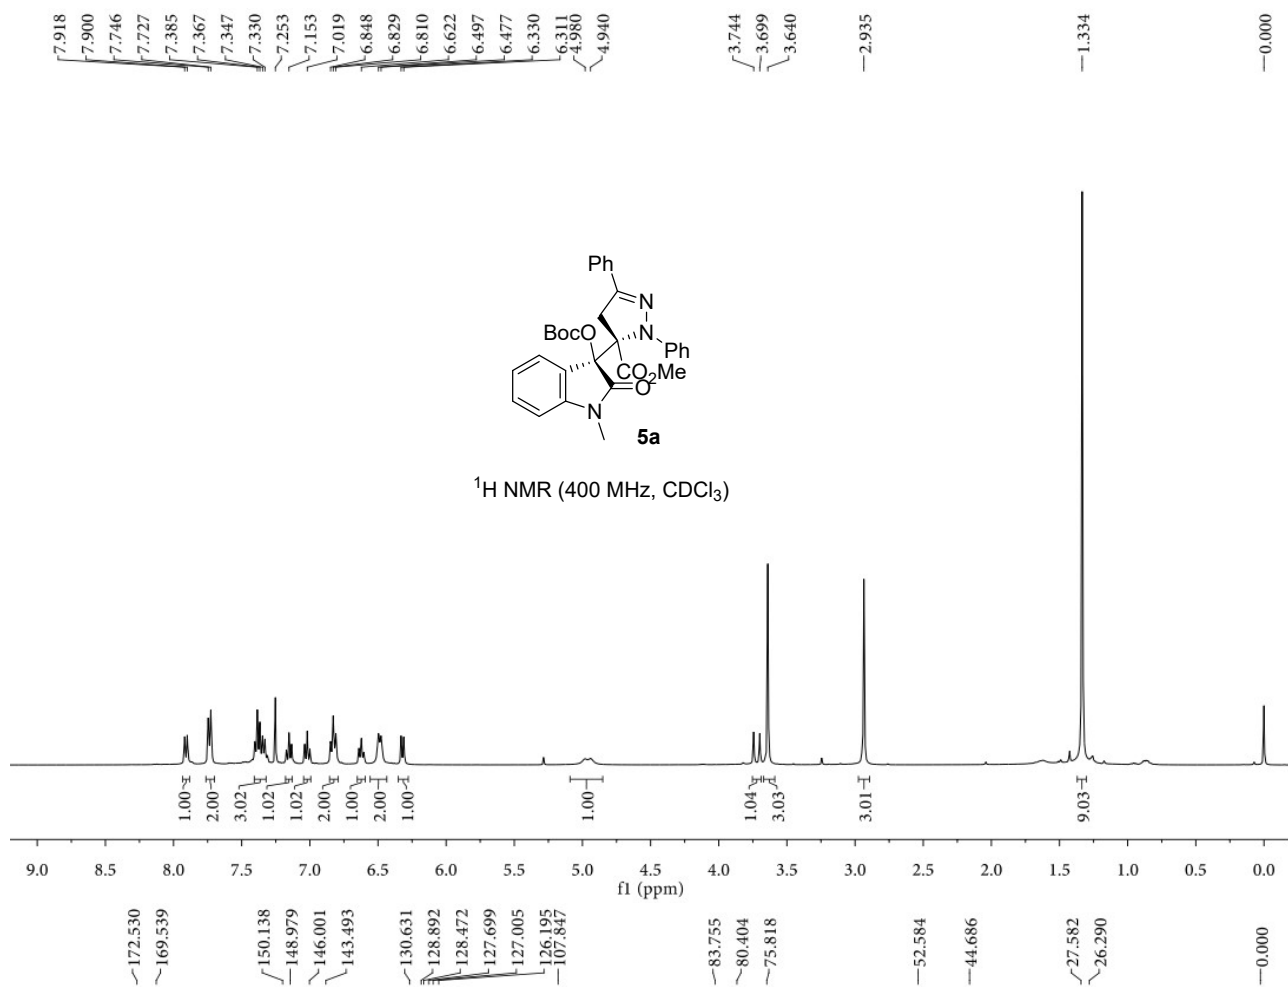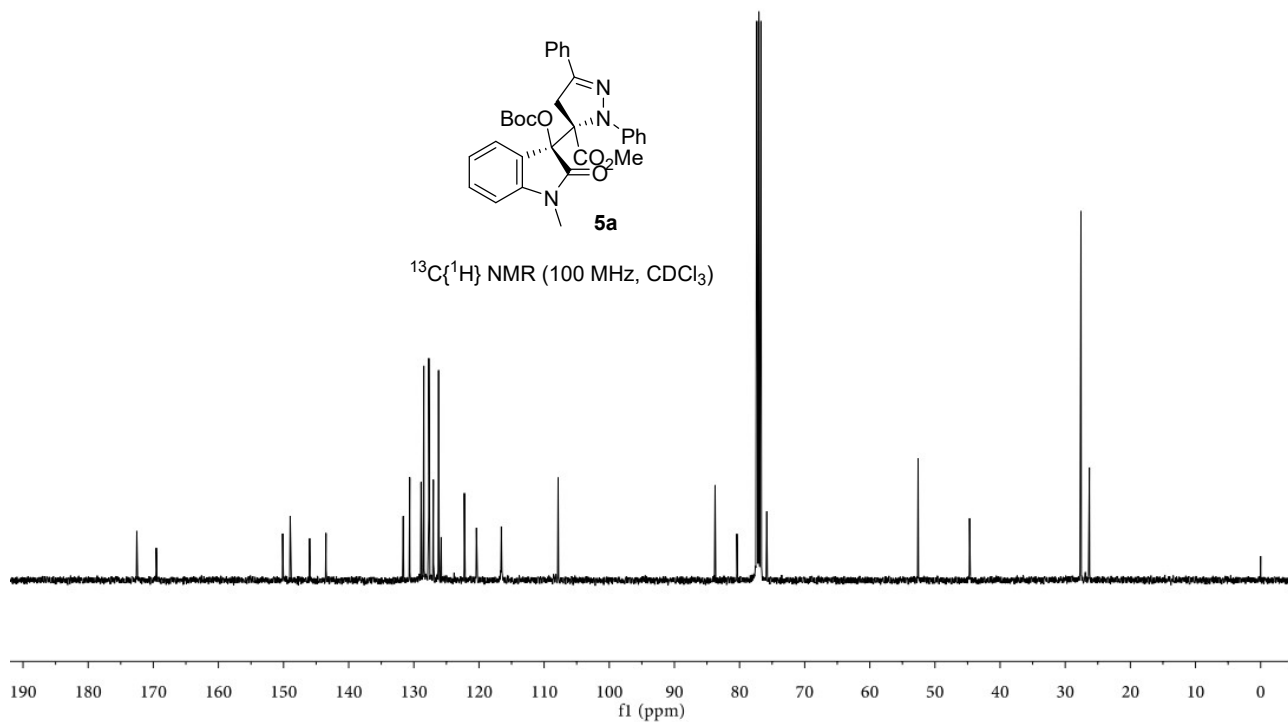

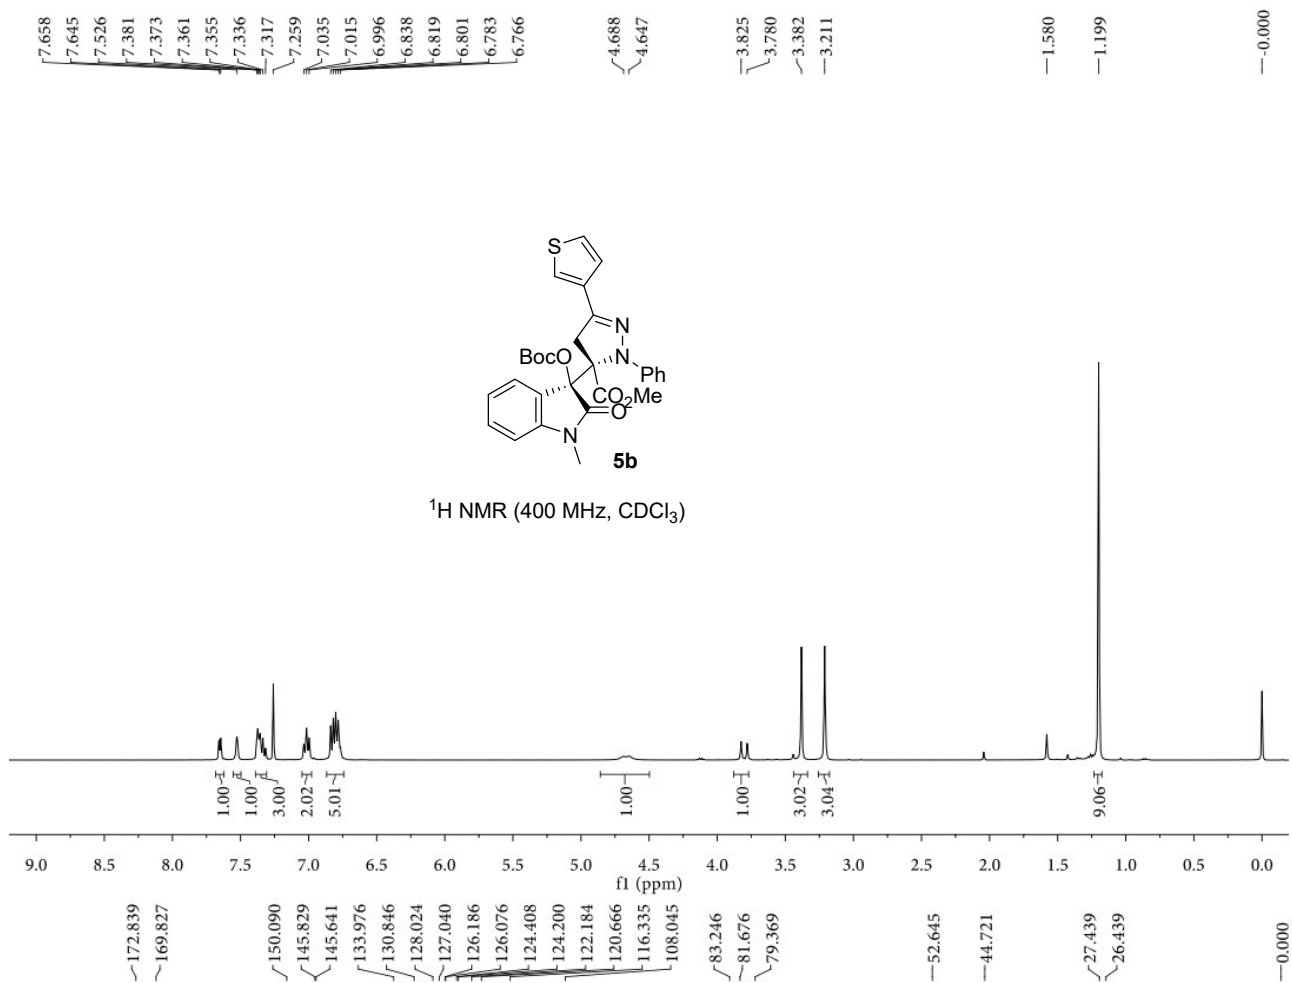



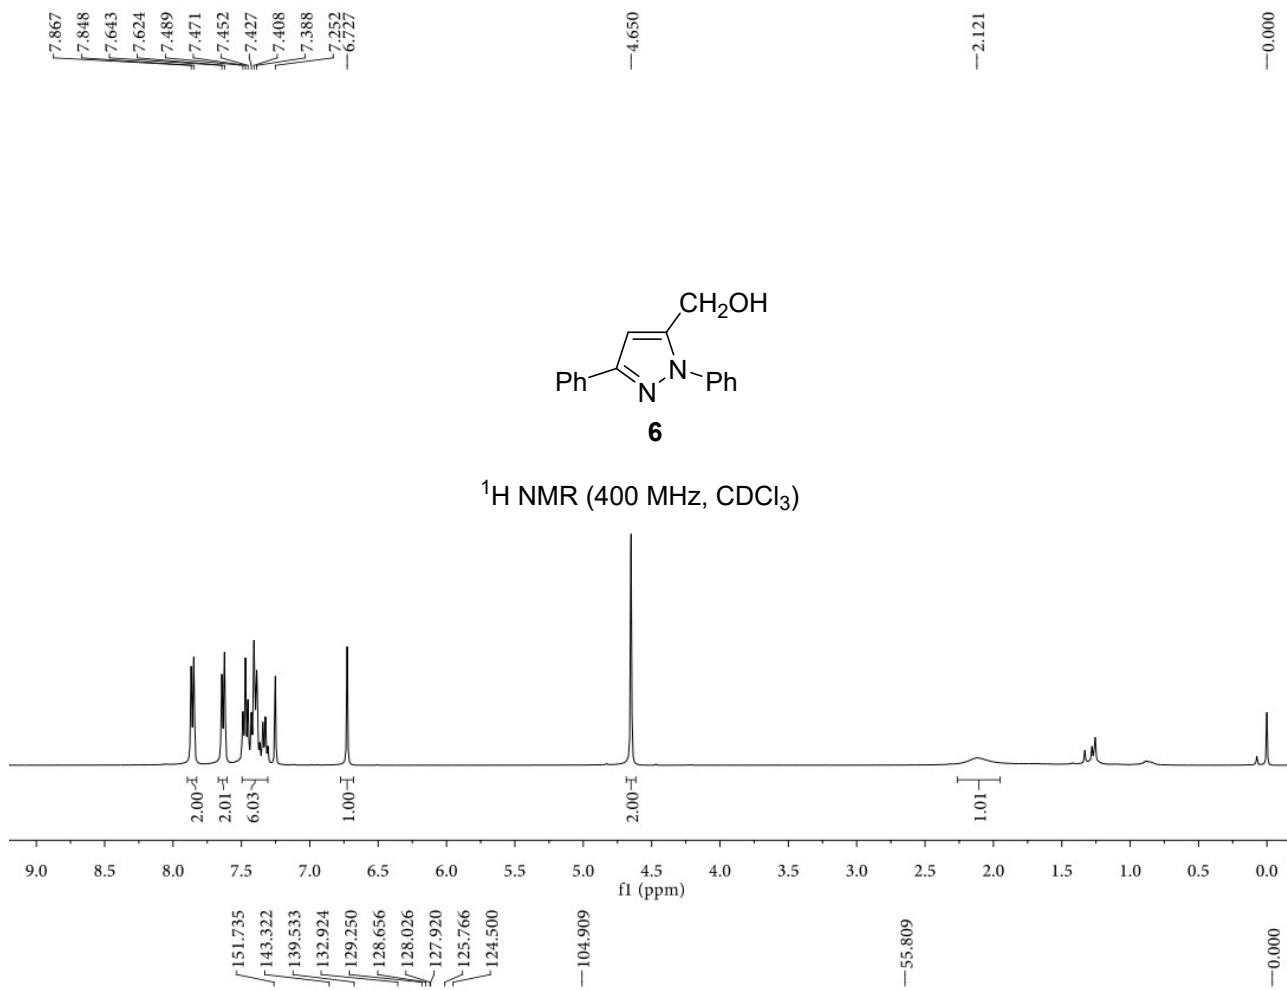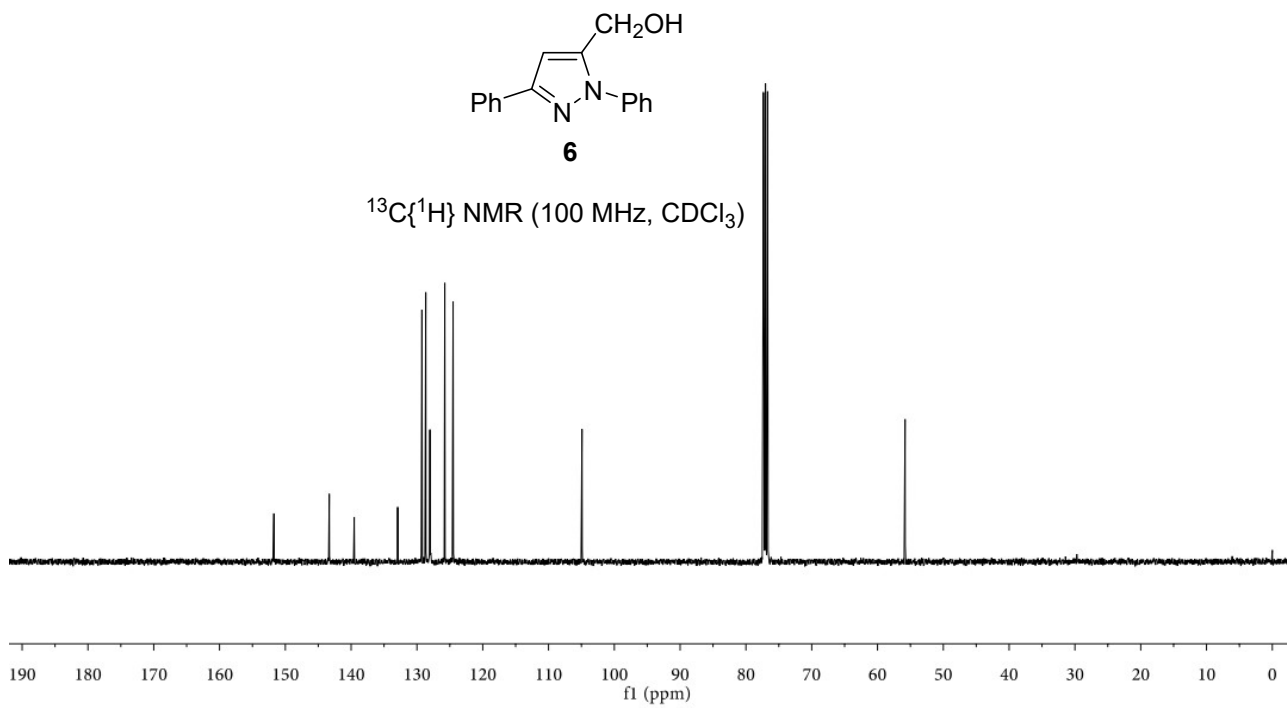

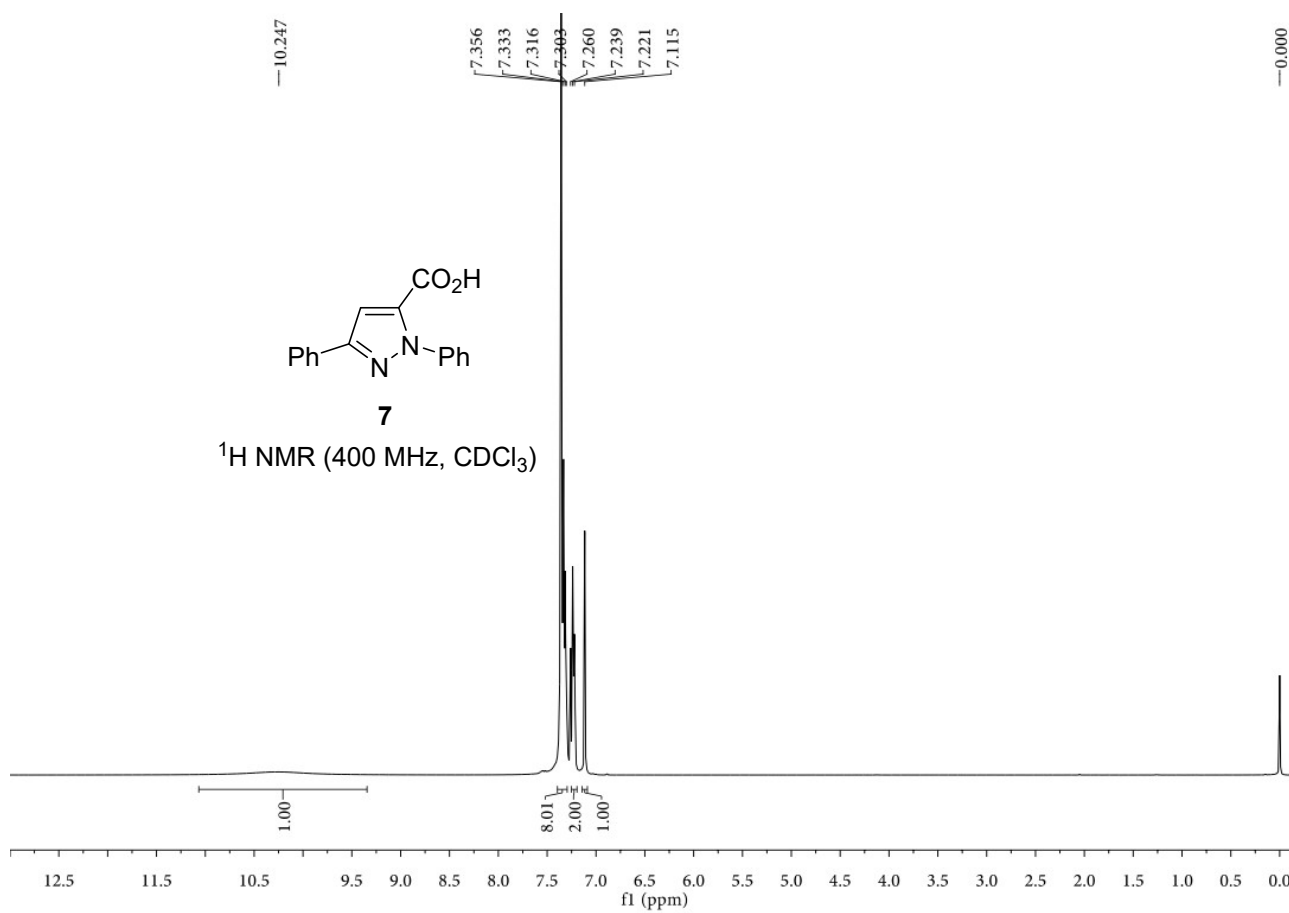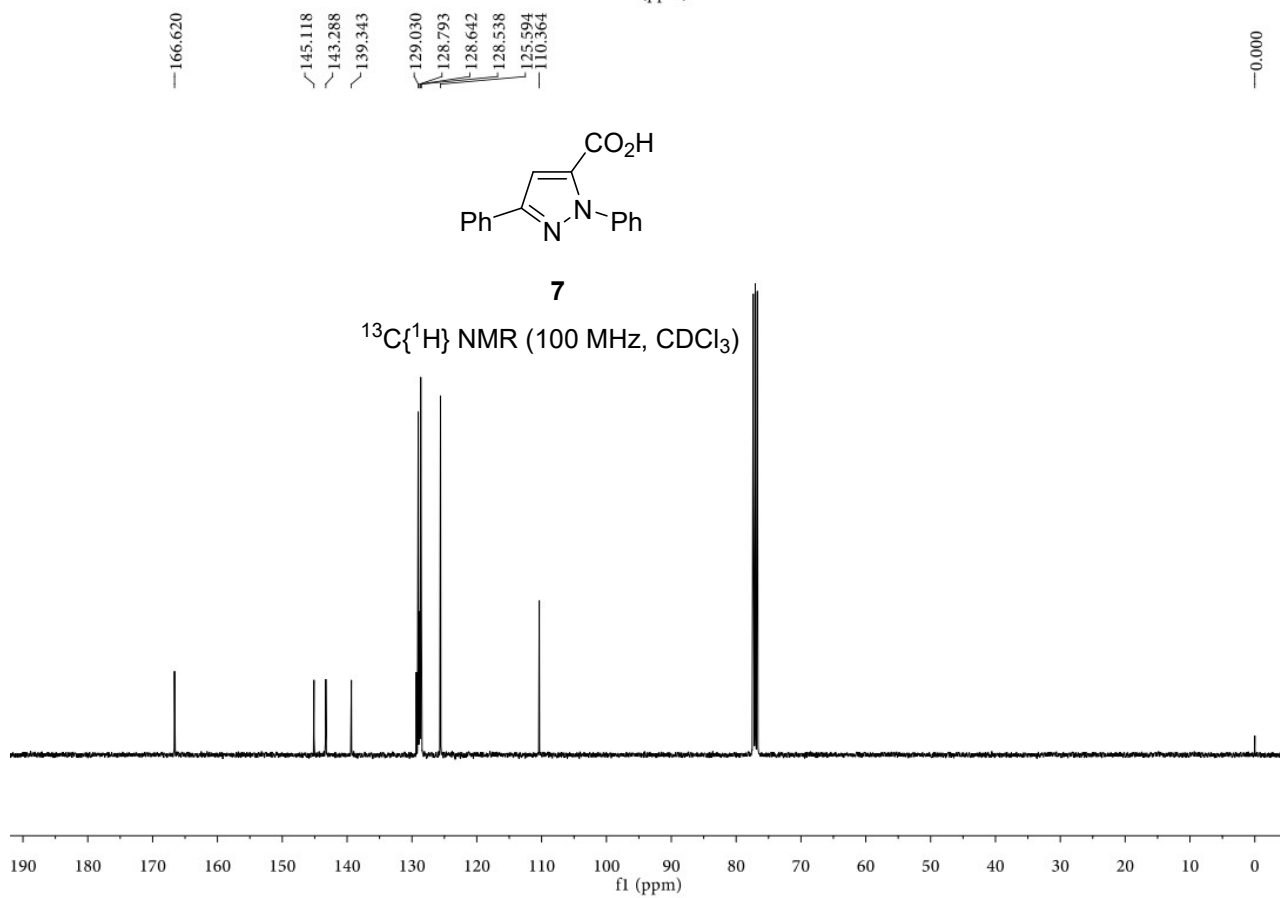

Supplement: d2ob01253g1.pdf [file d2ob01253g1.pdf]
